# Supplementary material for: Worldwide Burden, Risk Factors, and Temporal Trends of Ovarian Cancer: A Global Study
Source: MDPI journal article supplement (doi:10.3390/cancers14092230), 2022-04-29

## **Supplementary Legends**

**Supplementary Figure S1:** The plots of incidence and mortality trends for each country

**Supplementary Figure S2:** The graphs of the joinpoint regression output

**Supplementary Figure S3.** AAPC of incidence of ovarian cancer aged 50 years and older

**Supplementary Figure S4.** AAPC of incidence of ovarian cancer aged  $< 50$  years old

**Supplementary Figure S5.** AAPC of incidence of ovarian cancer aged  $< 40$  years old

Supplementary Figure S1: The plots of incidence and mortality trends for each country

Female

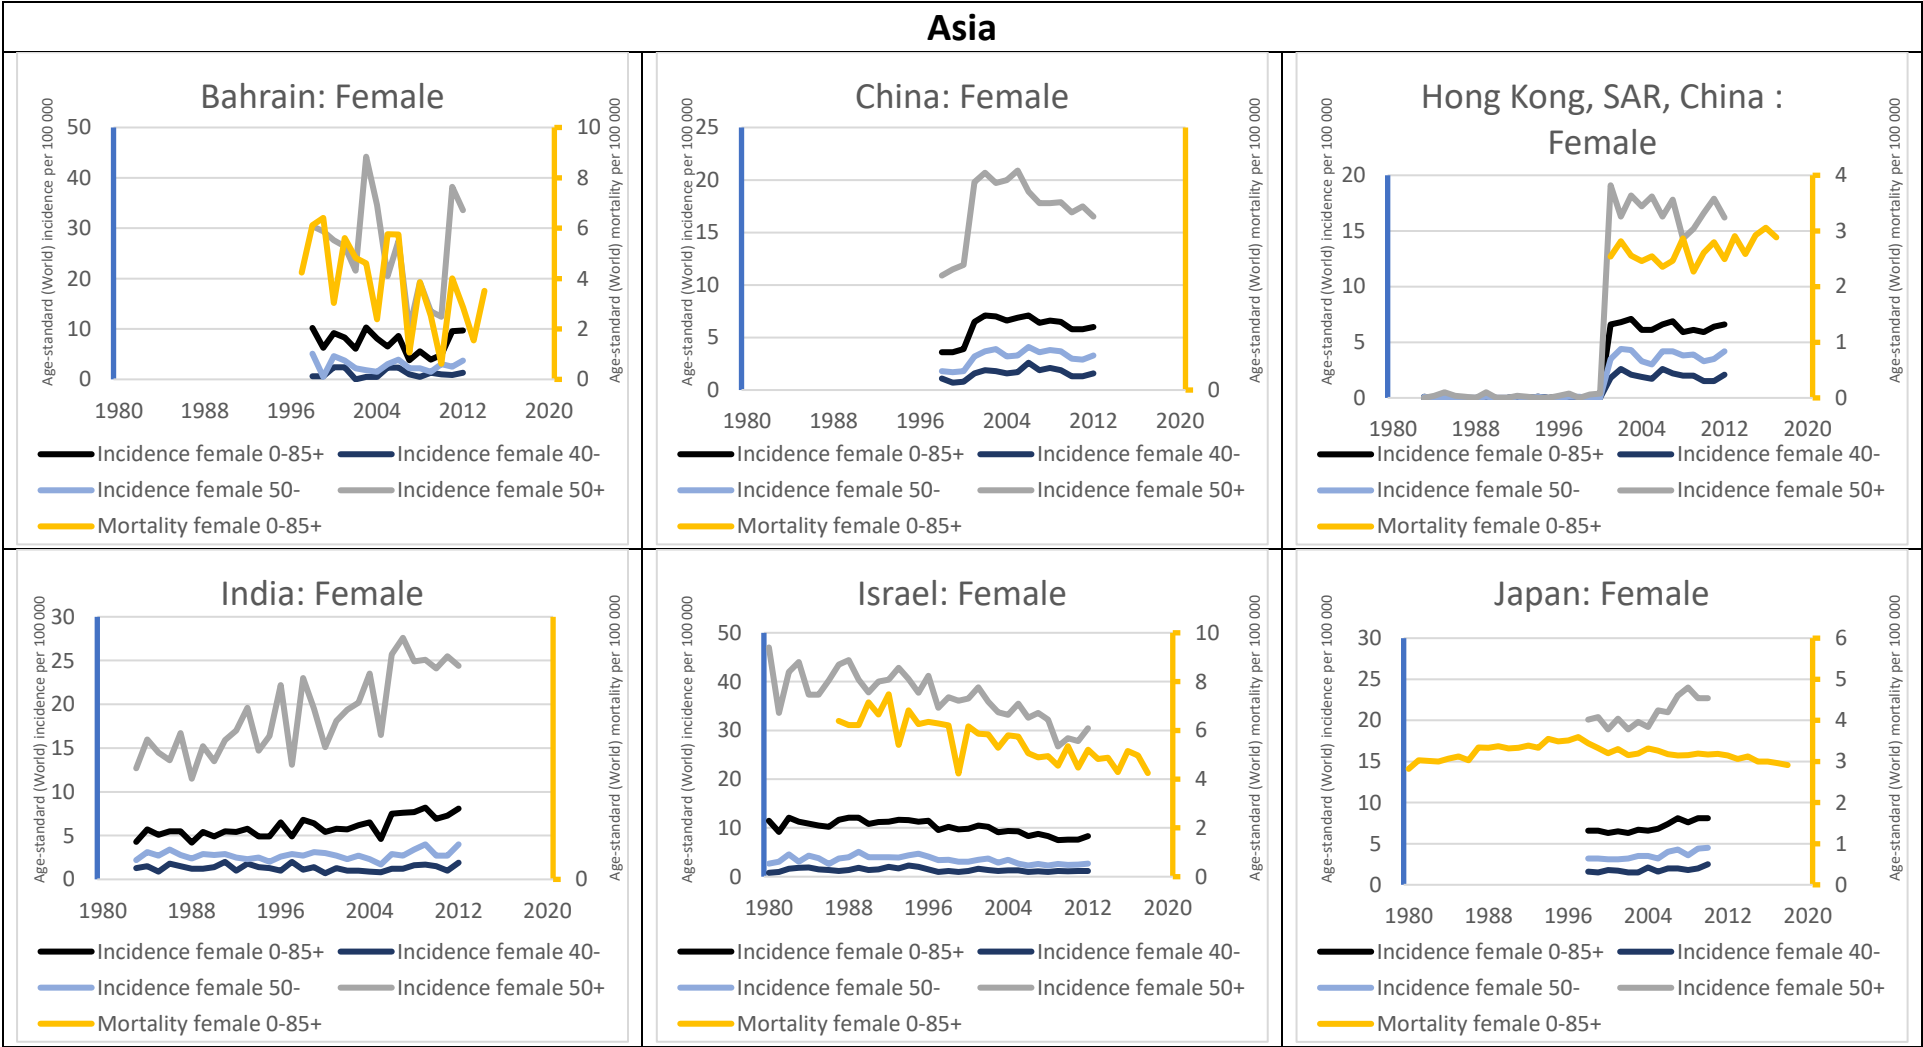

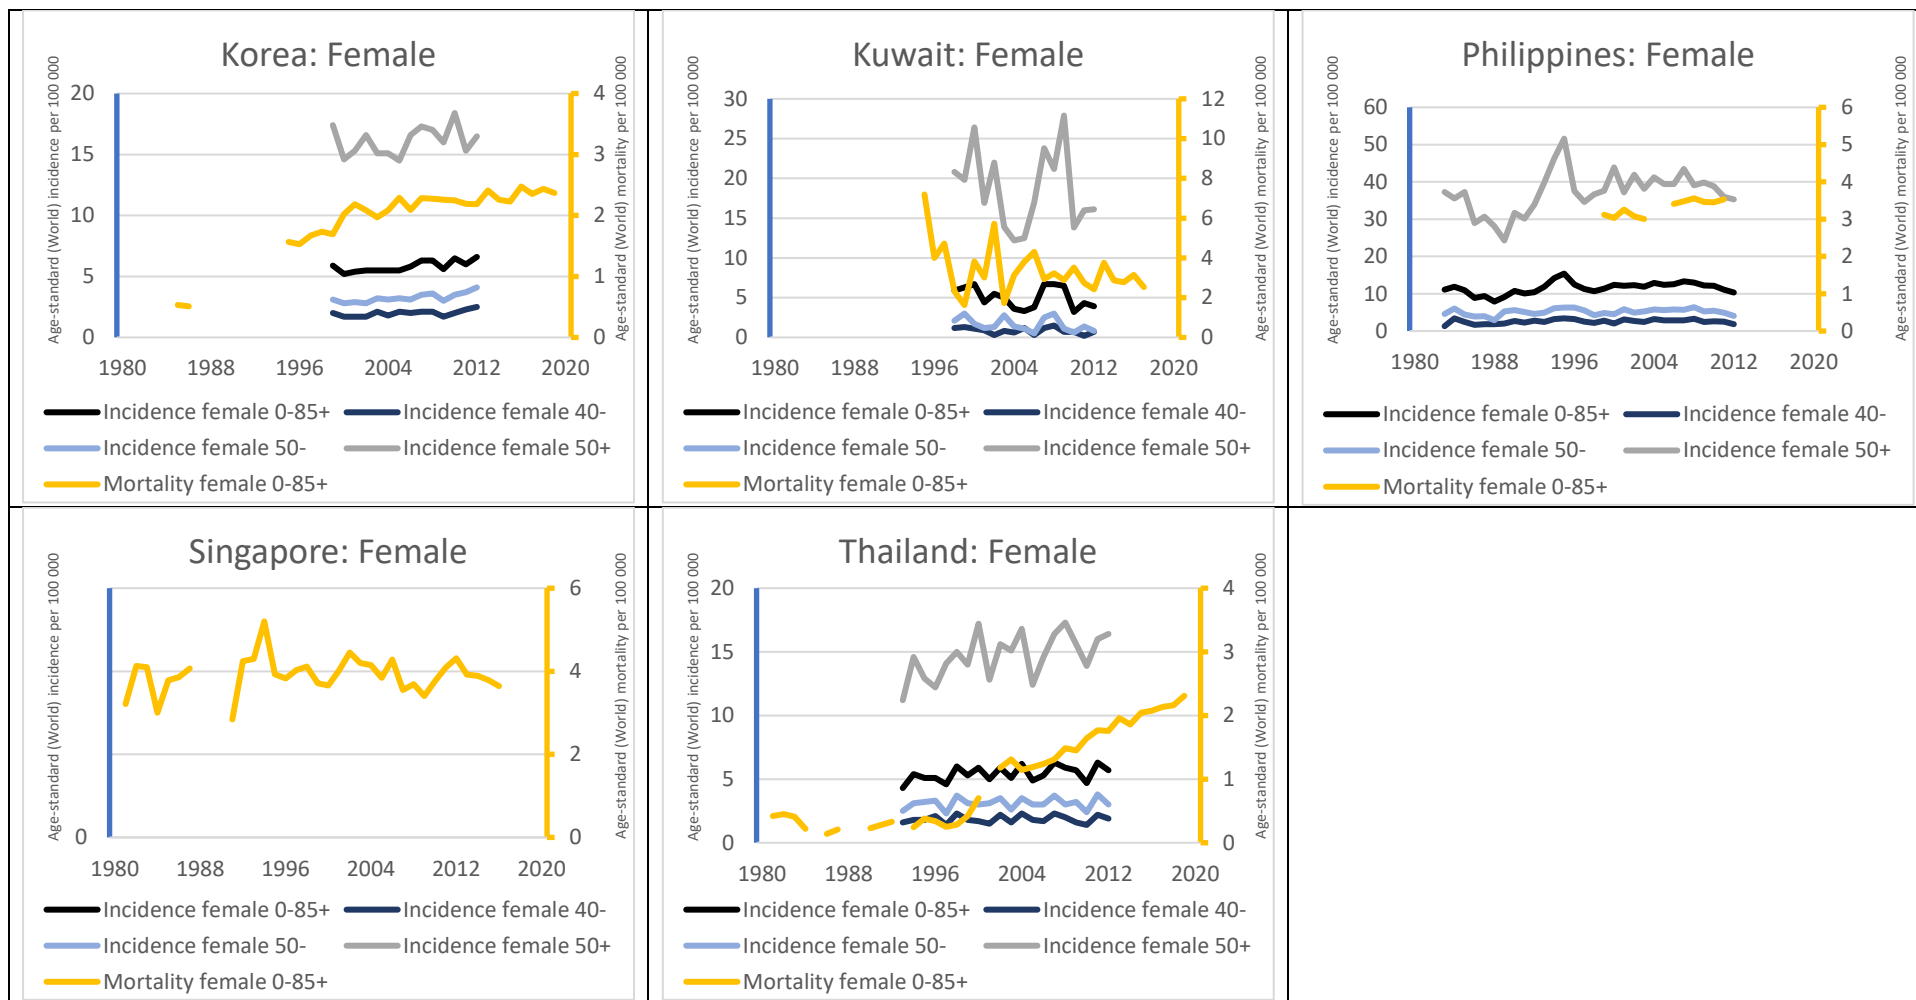

## Oceania

### Australia: Female

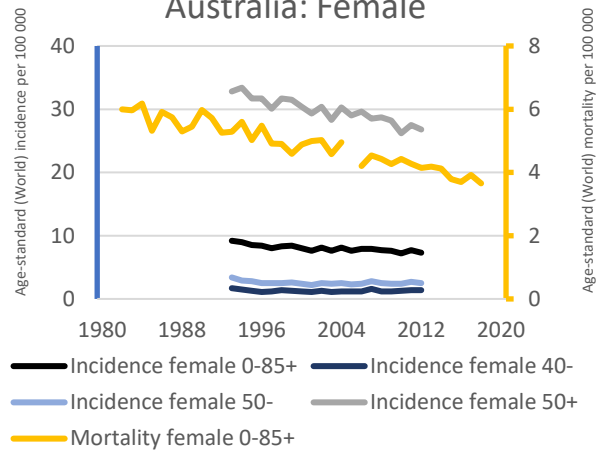

### New Zealand: Female

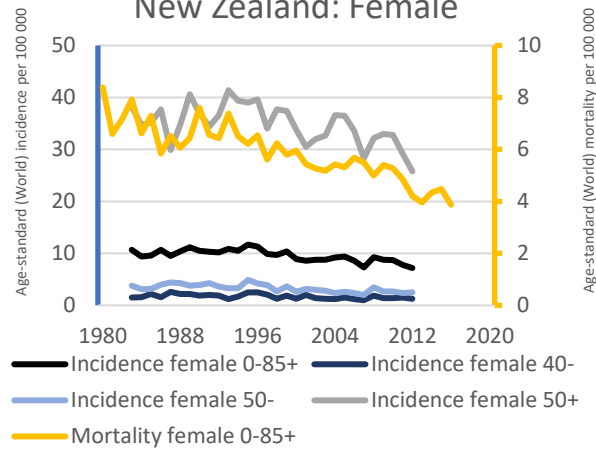

## Northern America

### Canada: Female

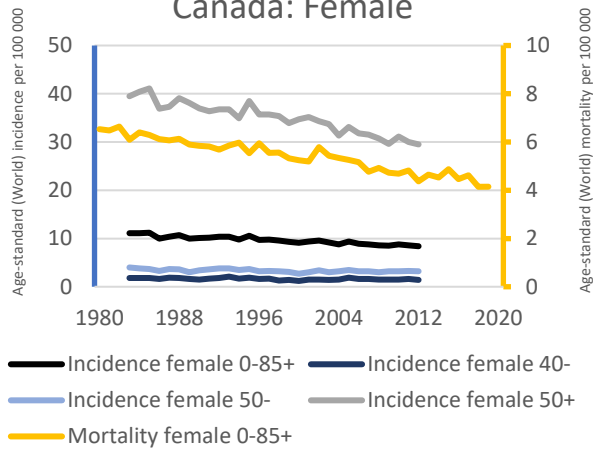

### USA: Female

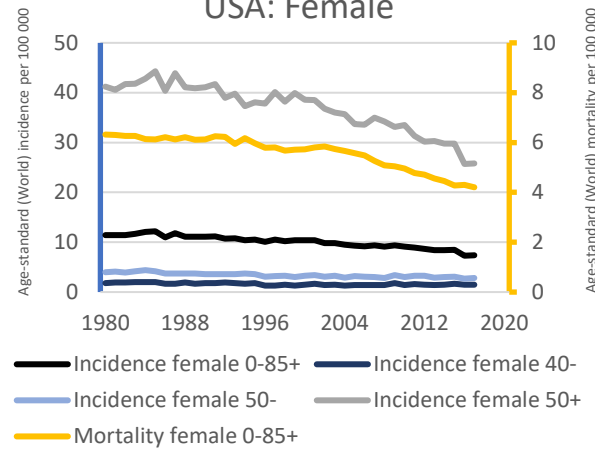

### USA Black: Female

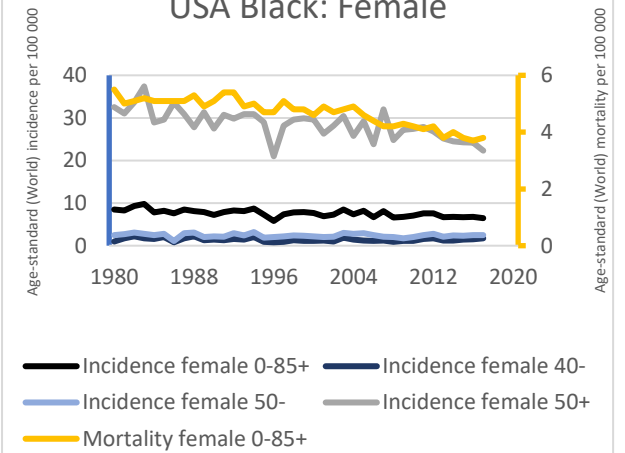

### USA White: Female

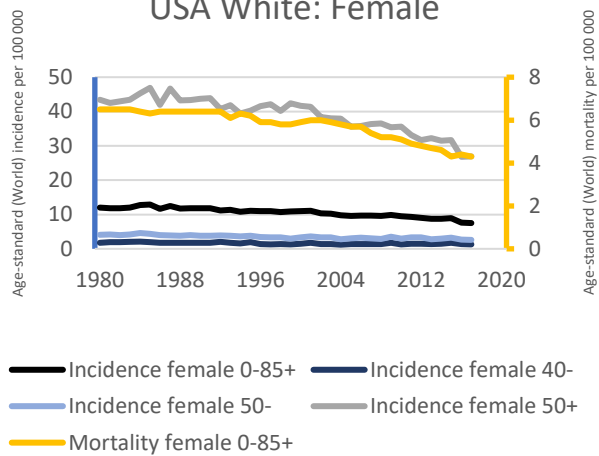

## Southern America

### Brazil: Female

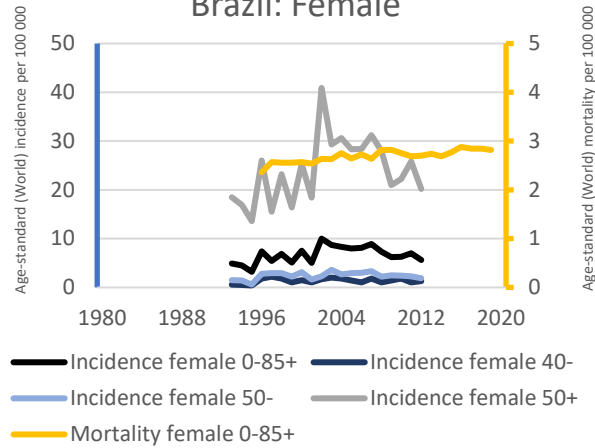

### Chile: Female

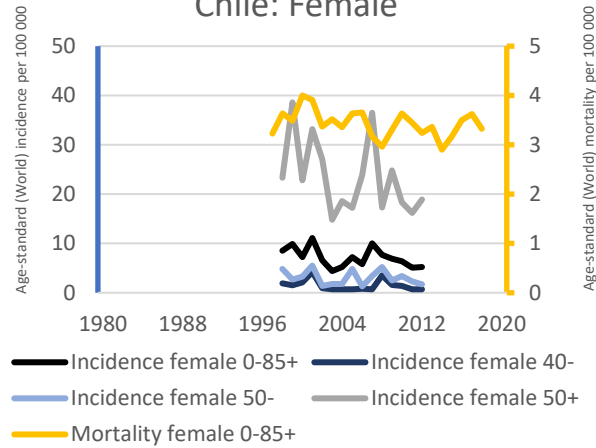

### Colombia: Female

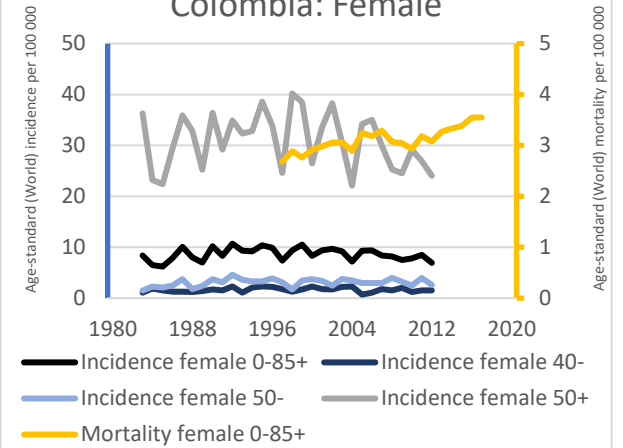

### Costa Rica: Female

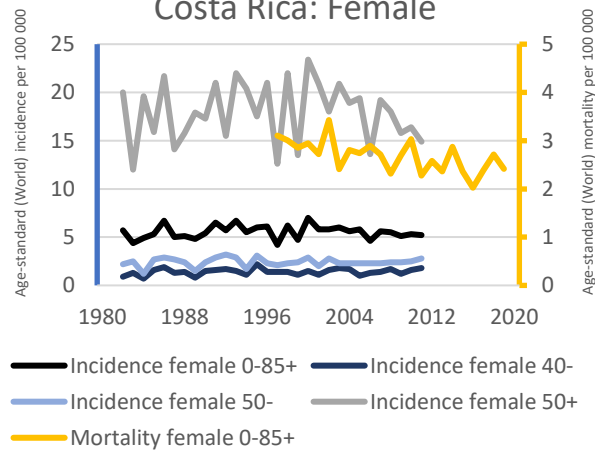

### Ecuador: Female

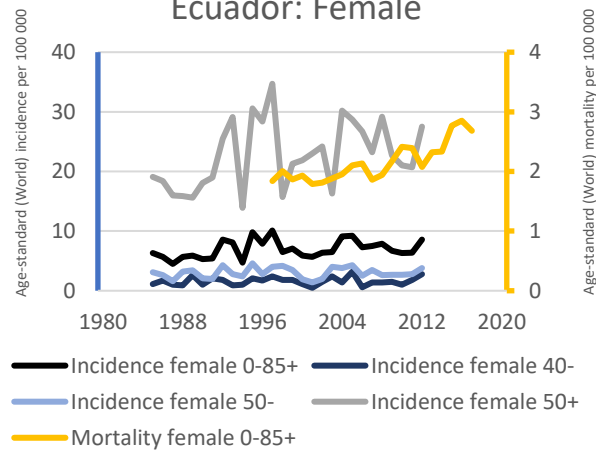

## Northern Europe

### Denmark: Female

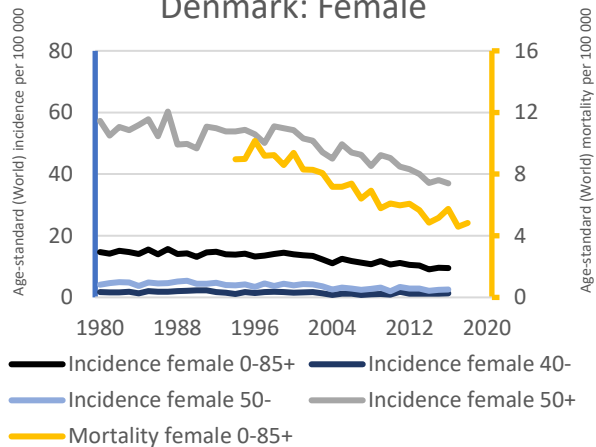

### Estonia: Female

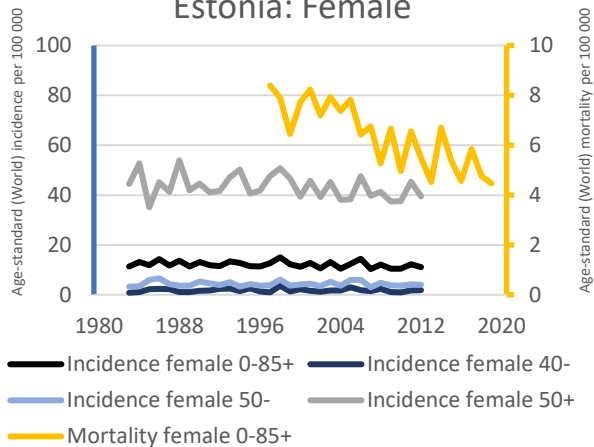

### Faroe Islands: Female

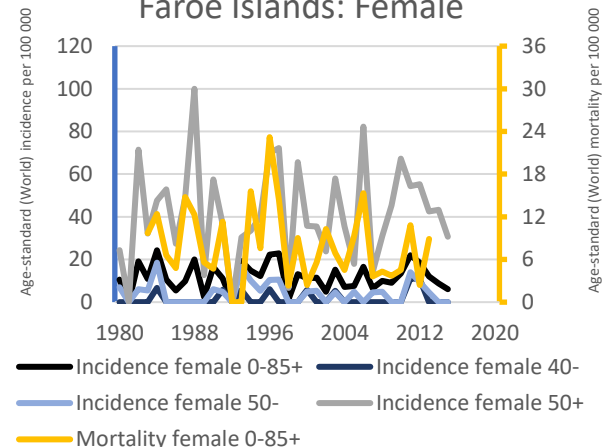

### Finland: Female

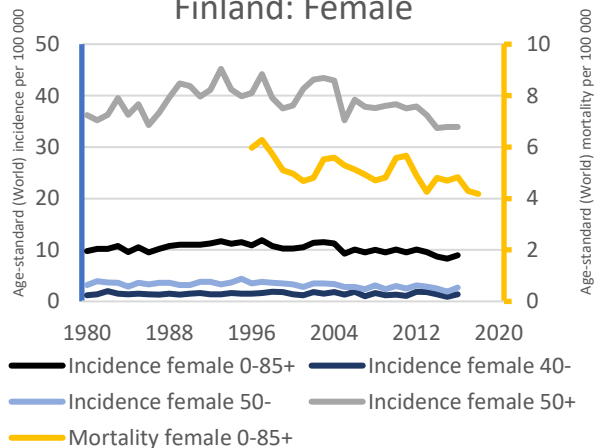

### Greenland: Female

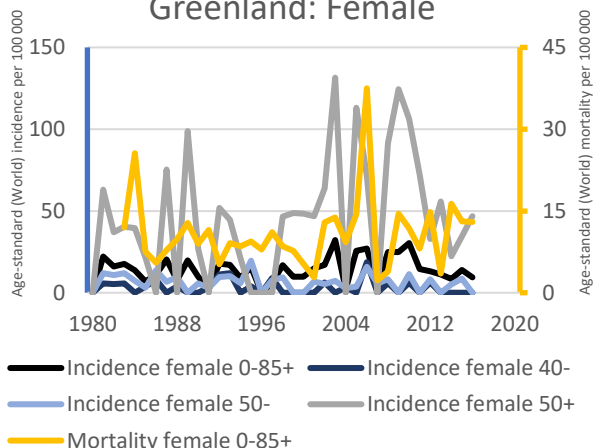

### Iceland: Female

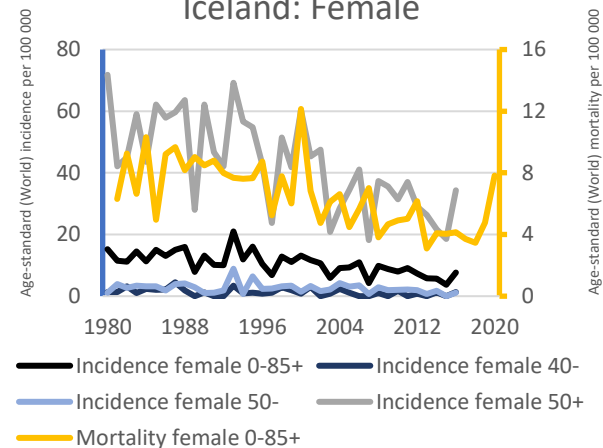

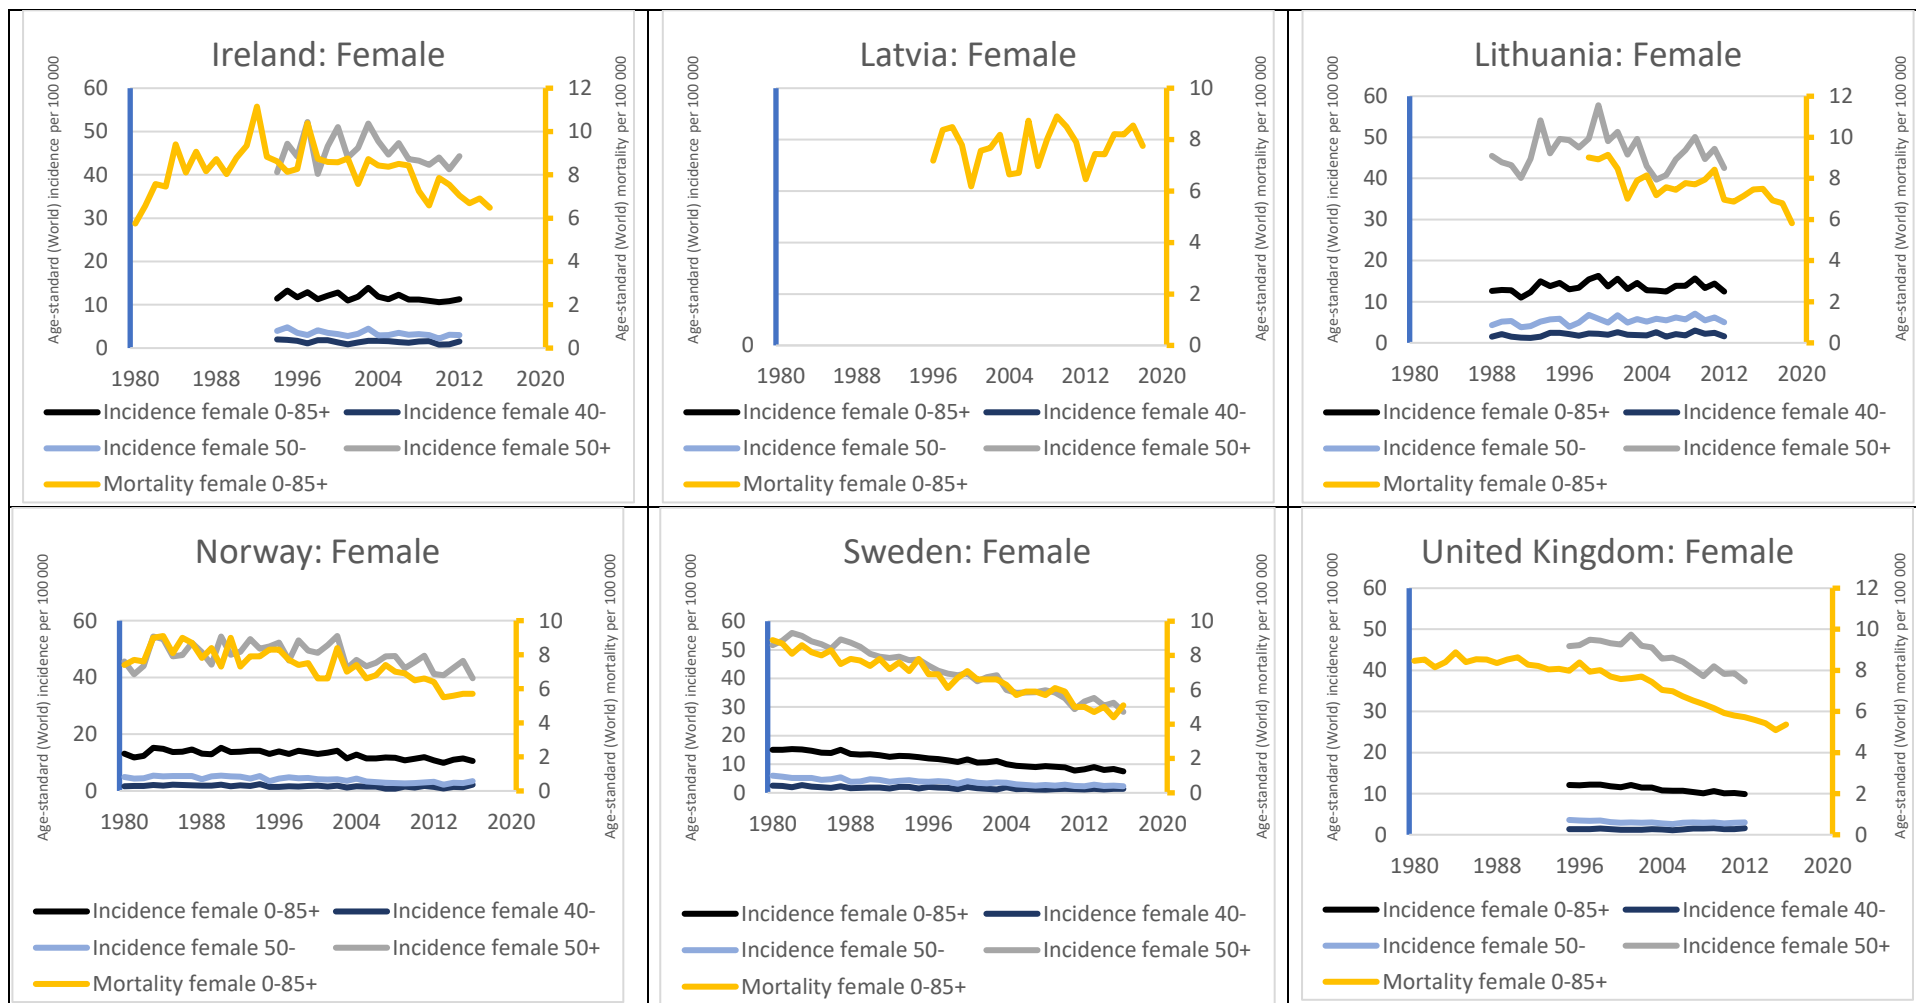



## Western Europe

### Austria: Female

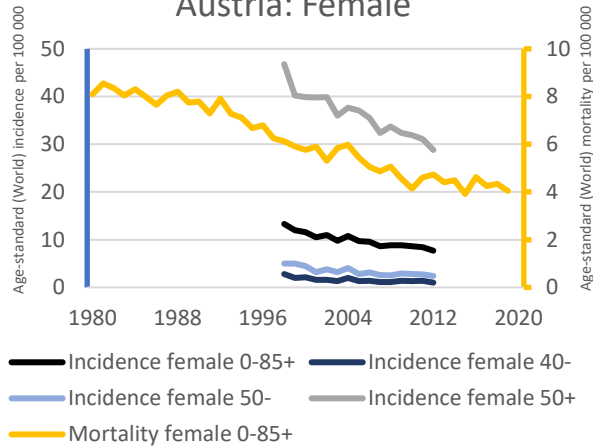

### Belgium: Female

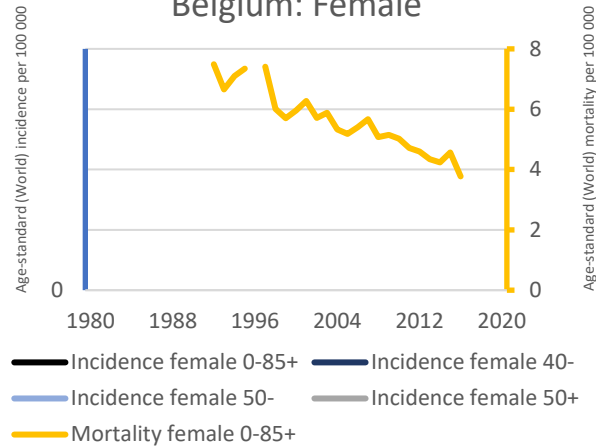

### France: Female

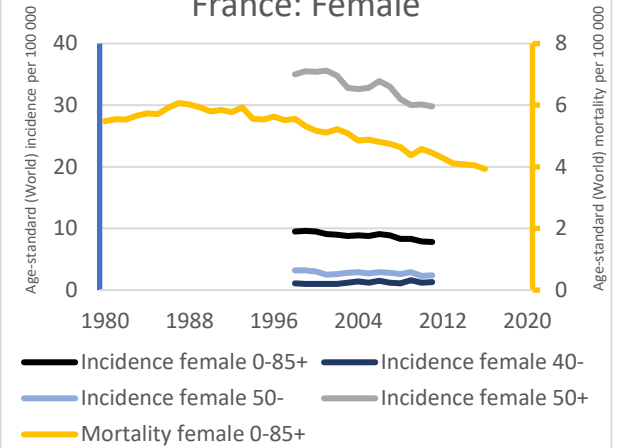

### Germany: Female

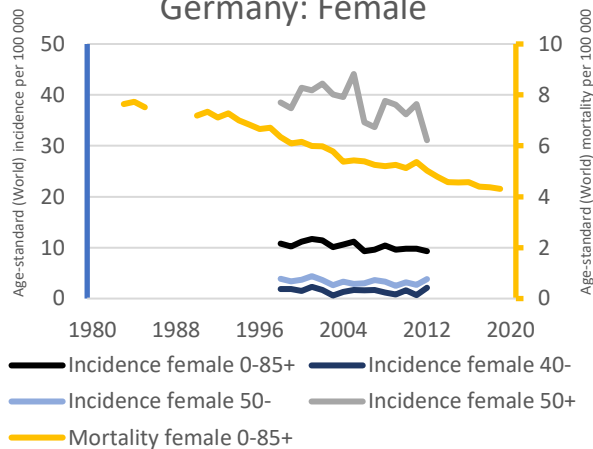

### Netherlands: Female

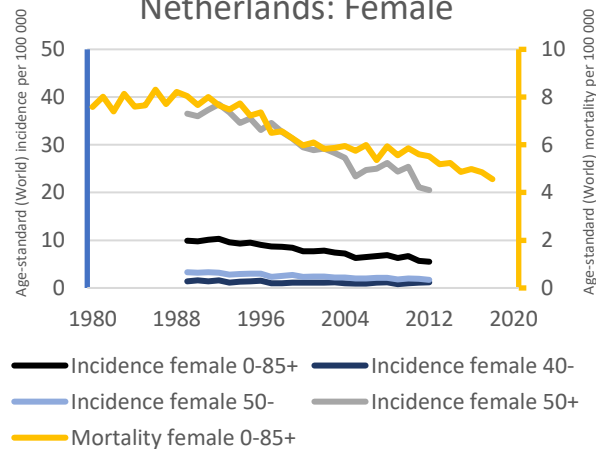

### Switzerland: Female

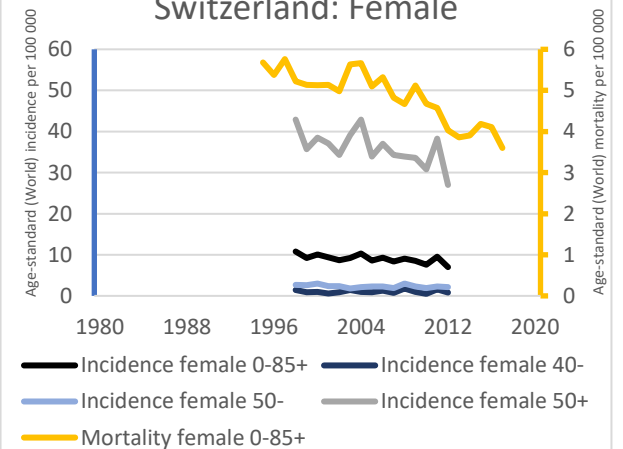

## Southern Europe

### Croatia: Female

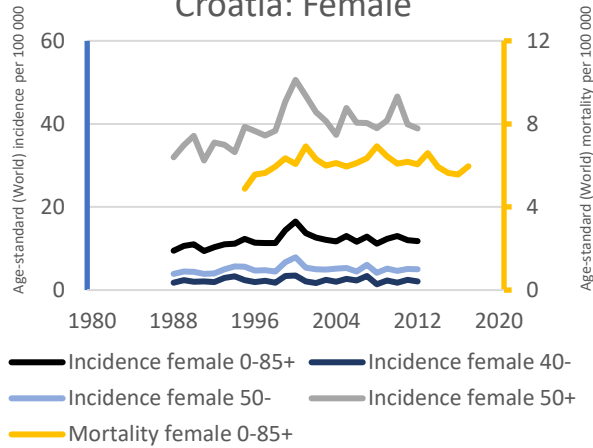

### Cyprus: Female

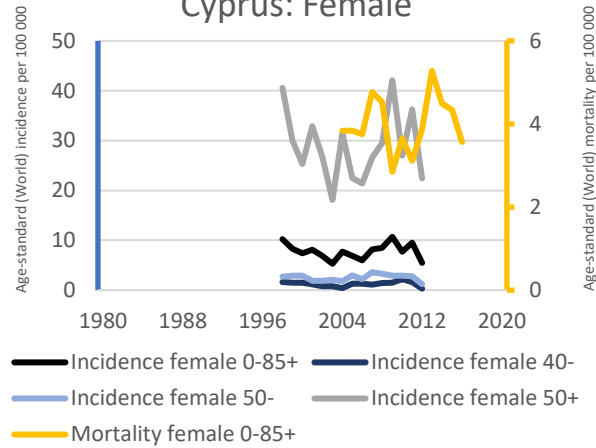

### Italy: Female

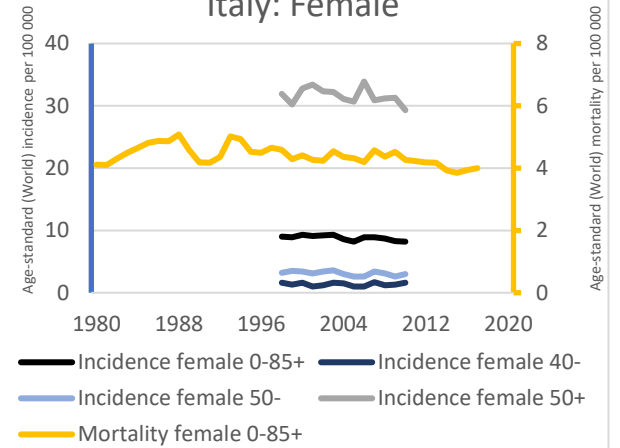

### Malta: Female

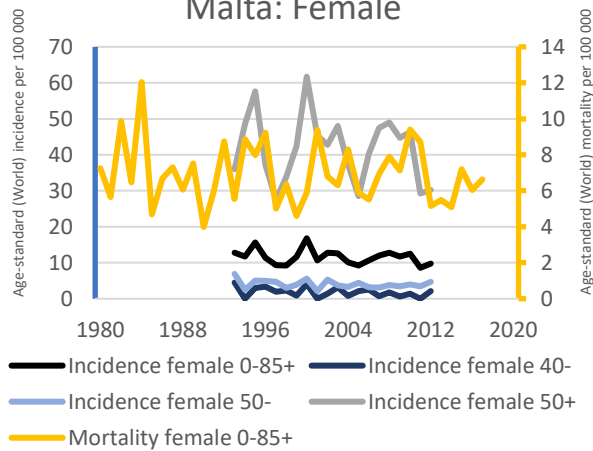

### Portugal: Female

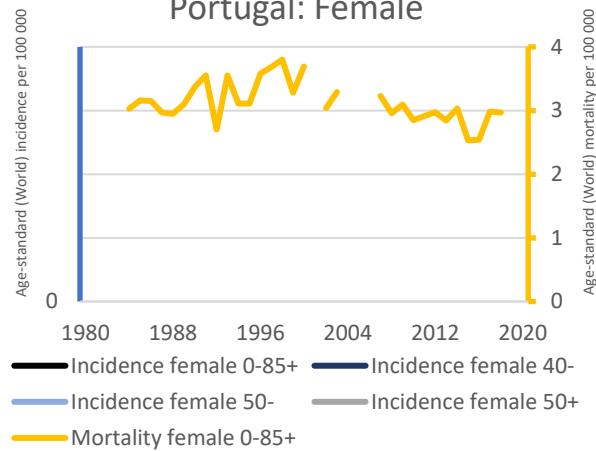

### Slovenia: Female

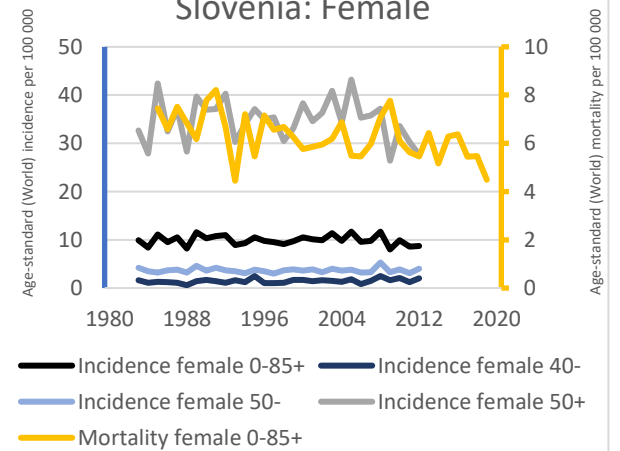

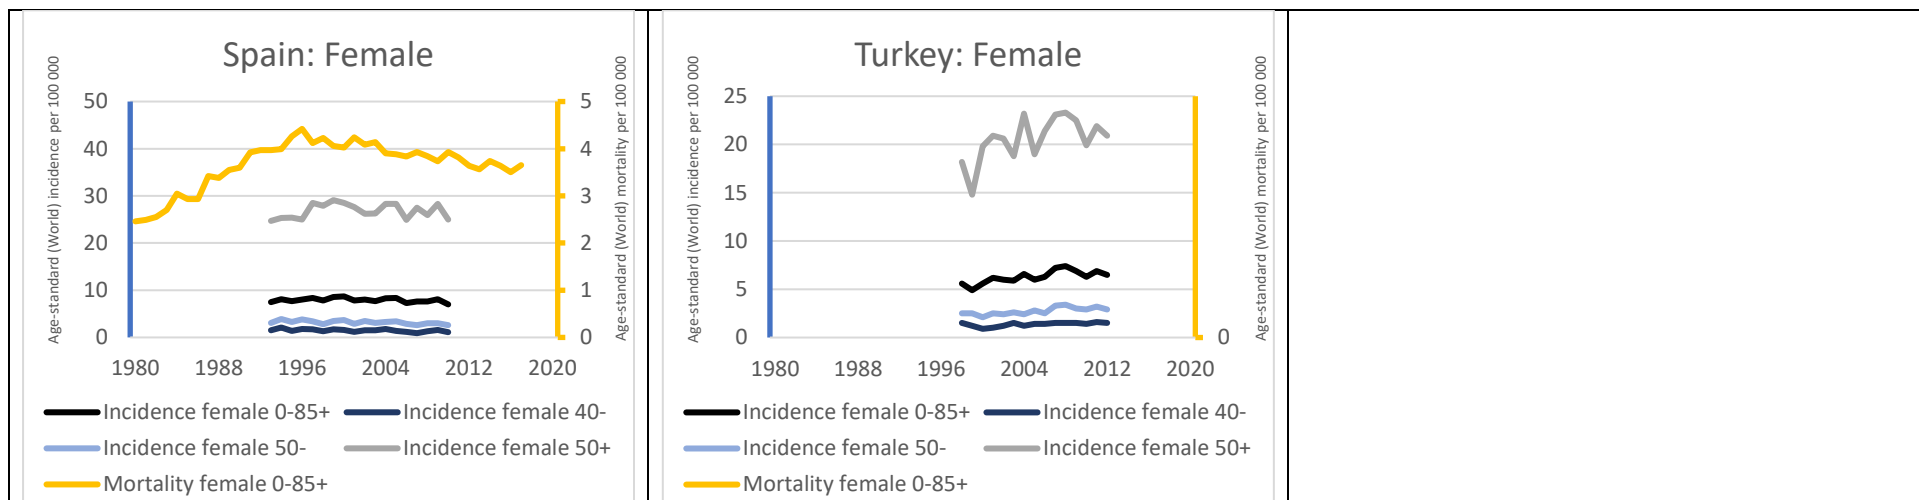

## Eastern Europe

### Belarus: Female

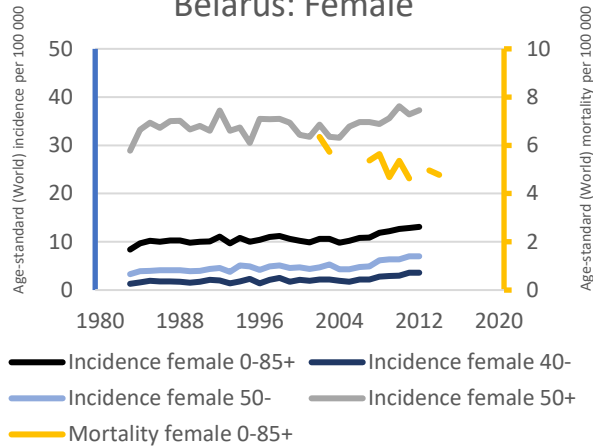

### Bulgaria: Female

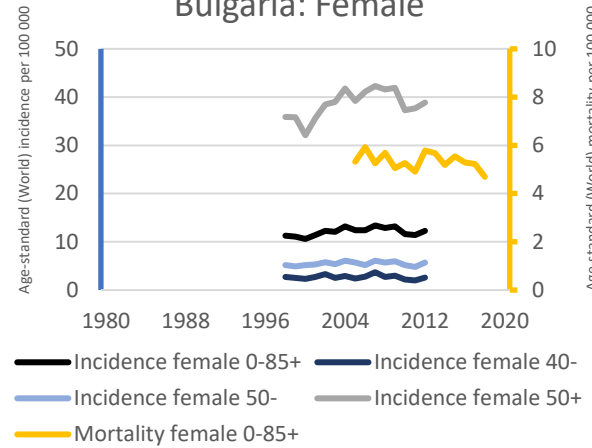

### Czech Republic: Female

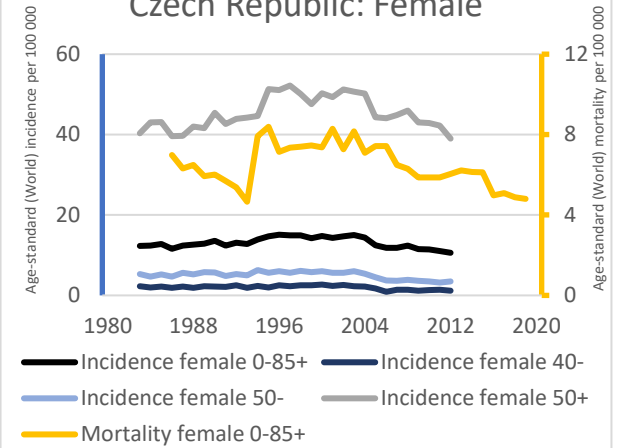

### Poland: Female

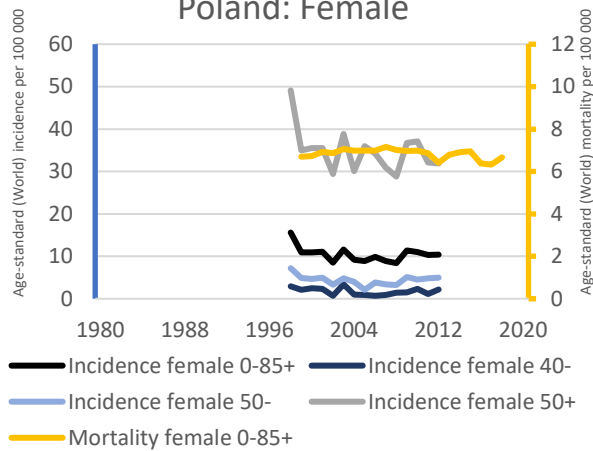

### Russian Federation: Female

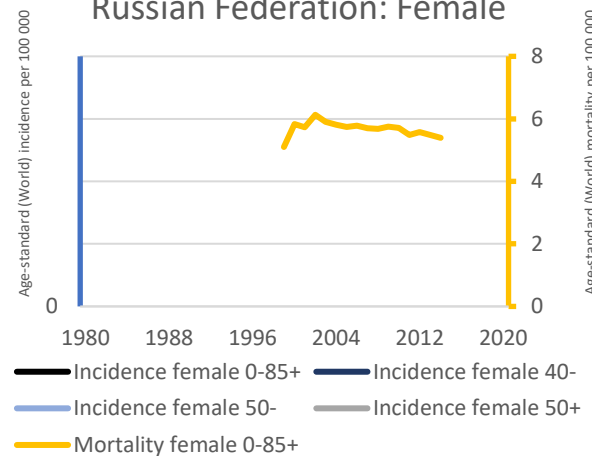

### Slovakia: Female

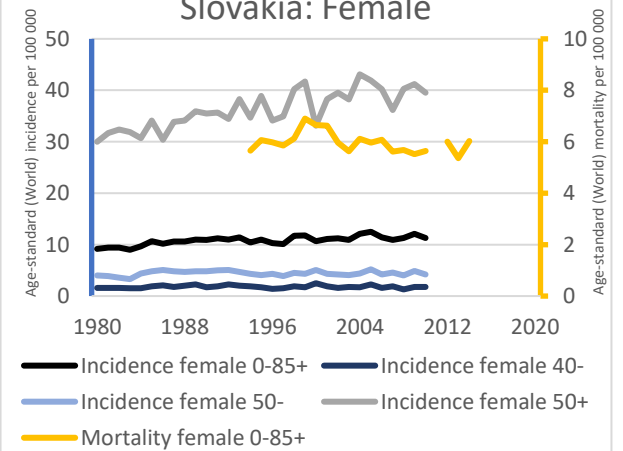

Africa

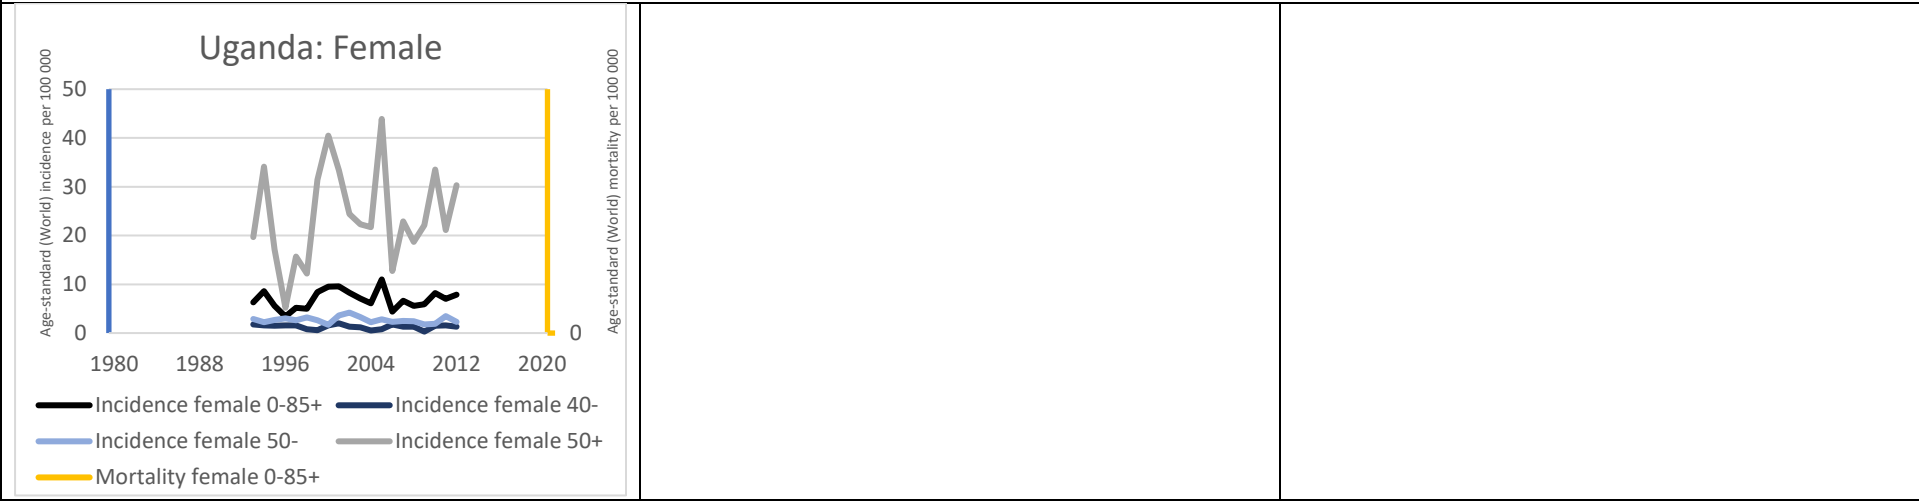

**Supplementary Figure S2: The graphs of the joinpoint regression**  
output a.) Incidence female all ages

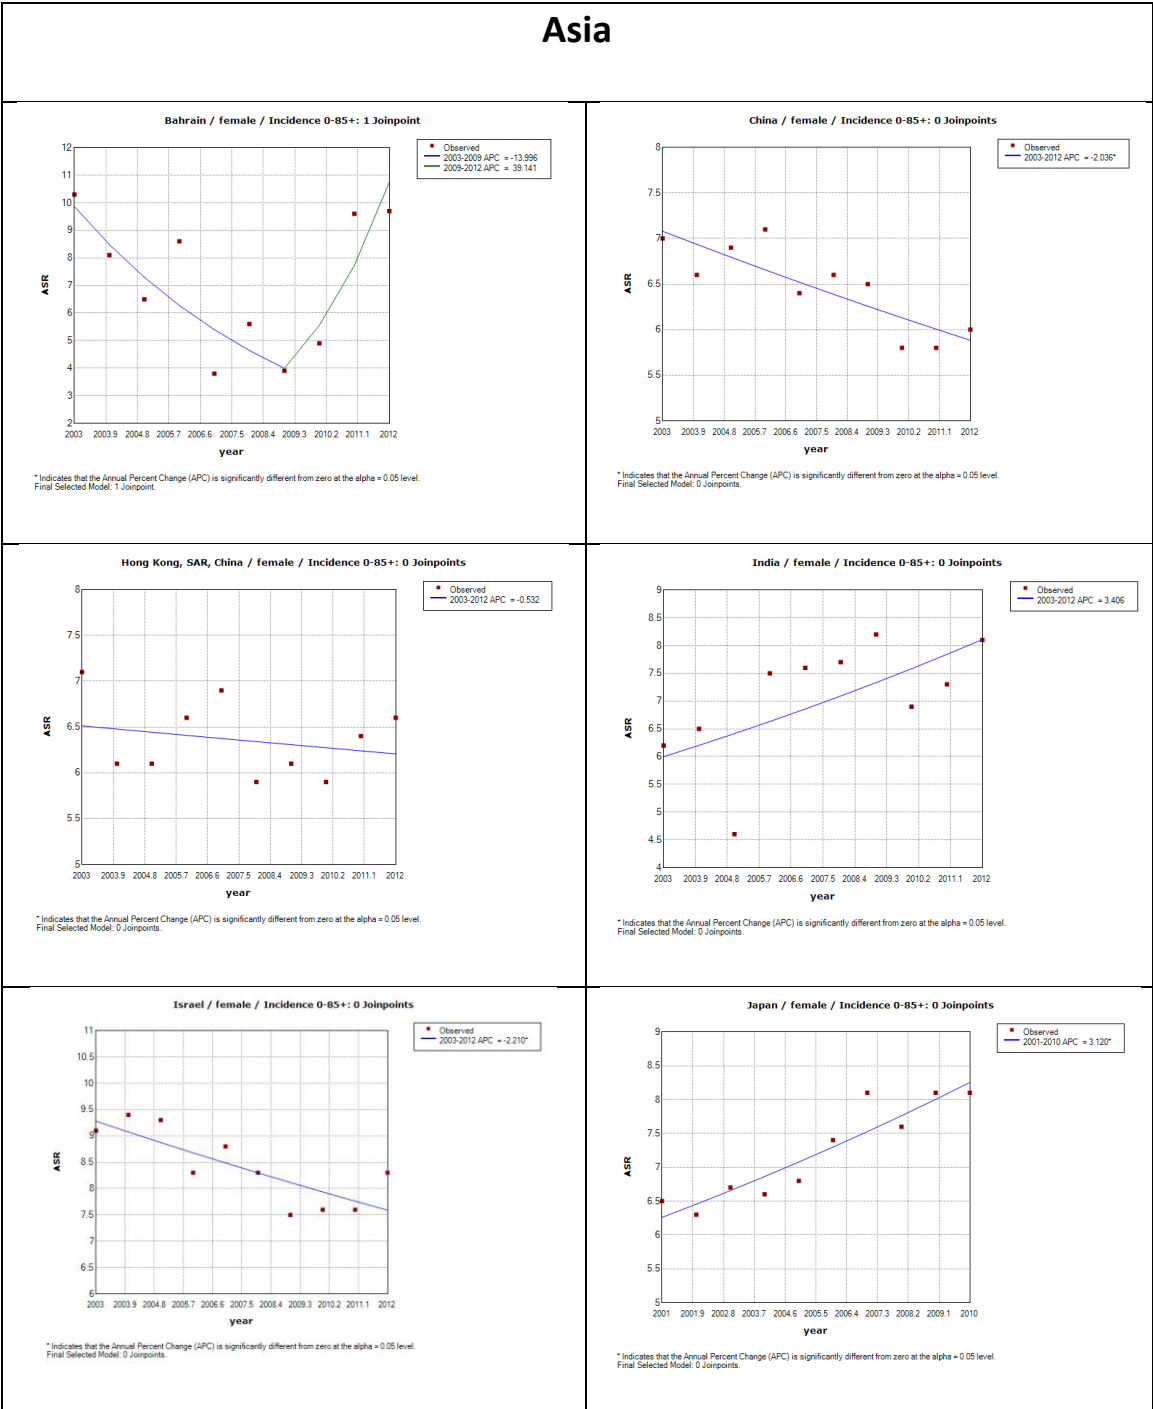

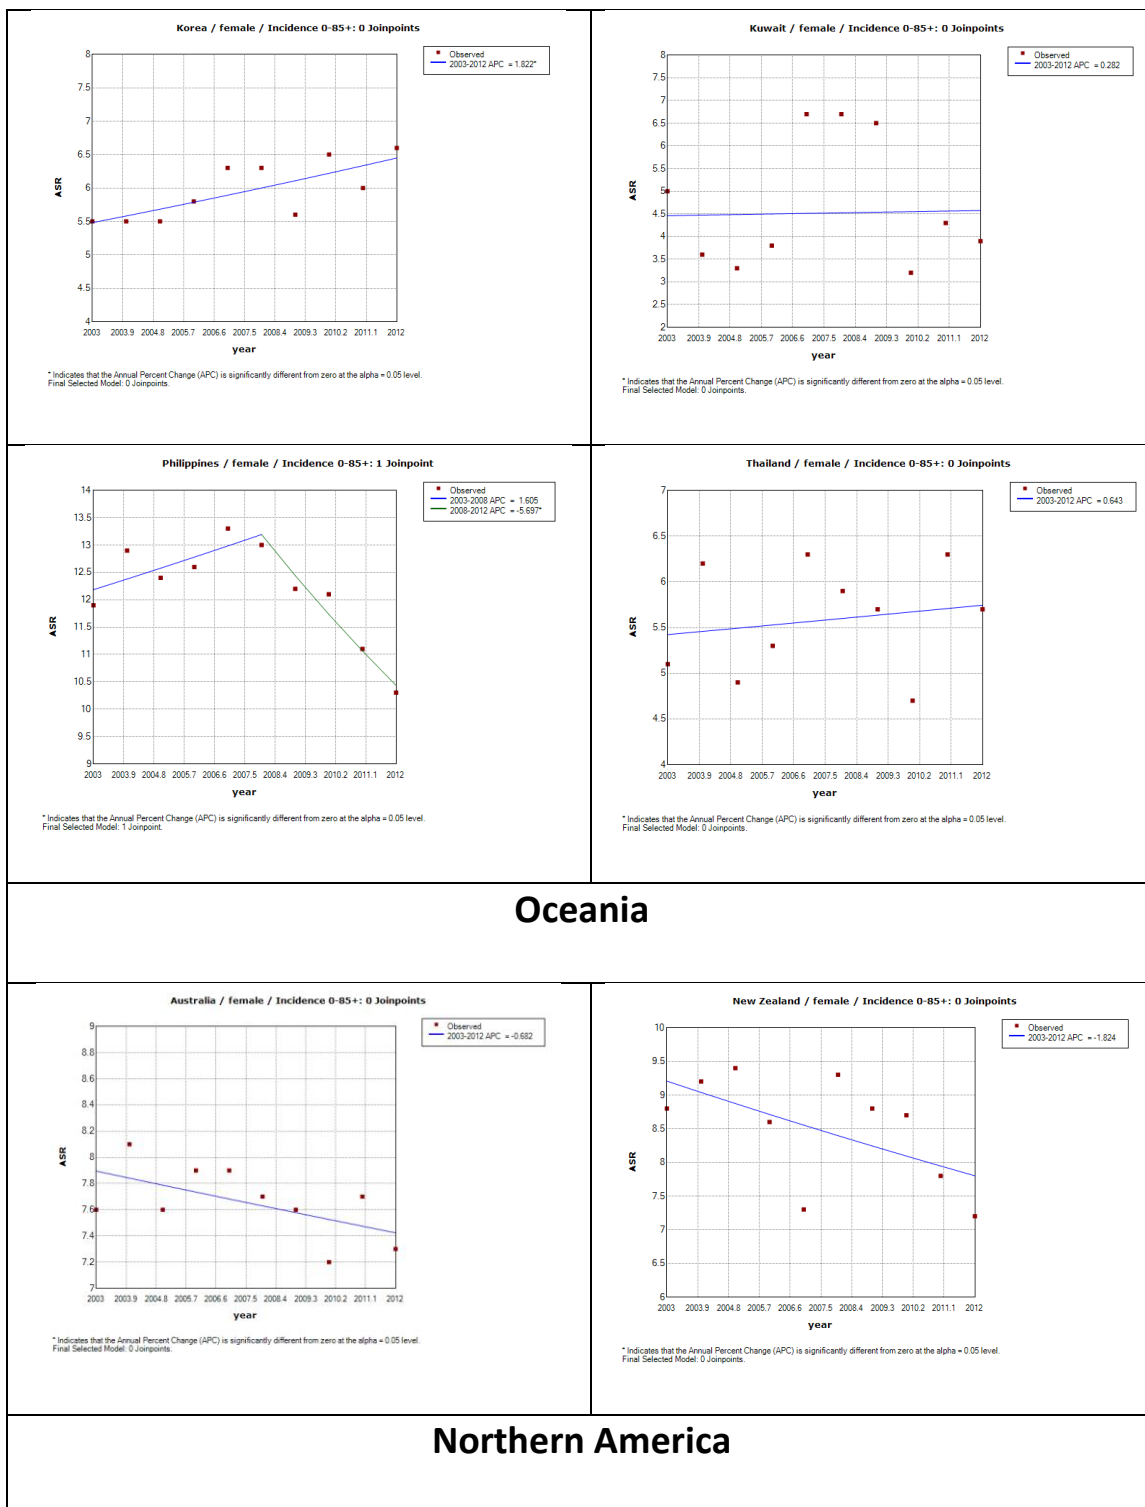

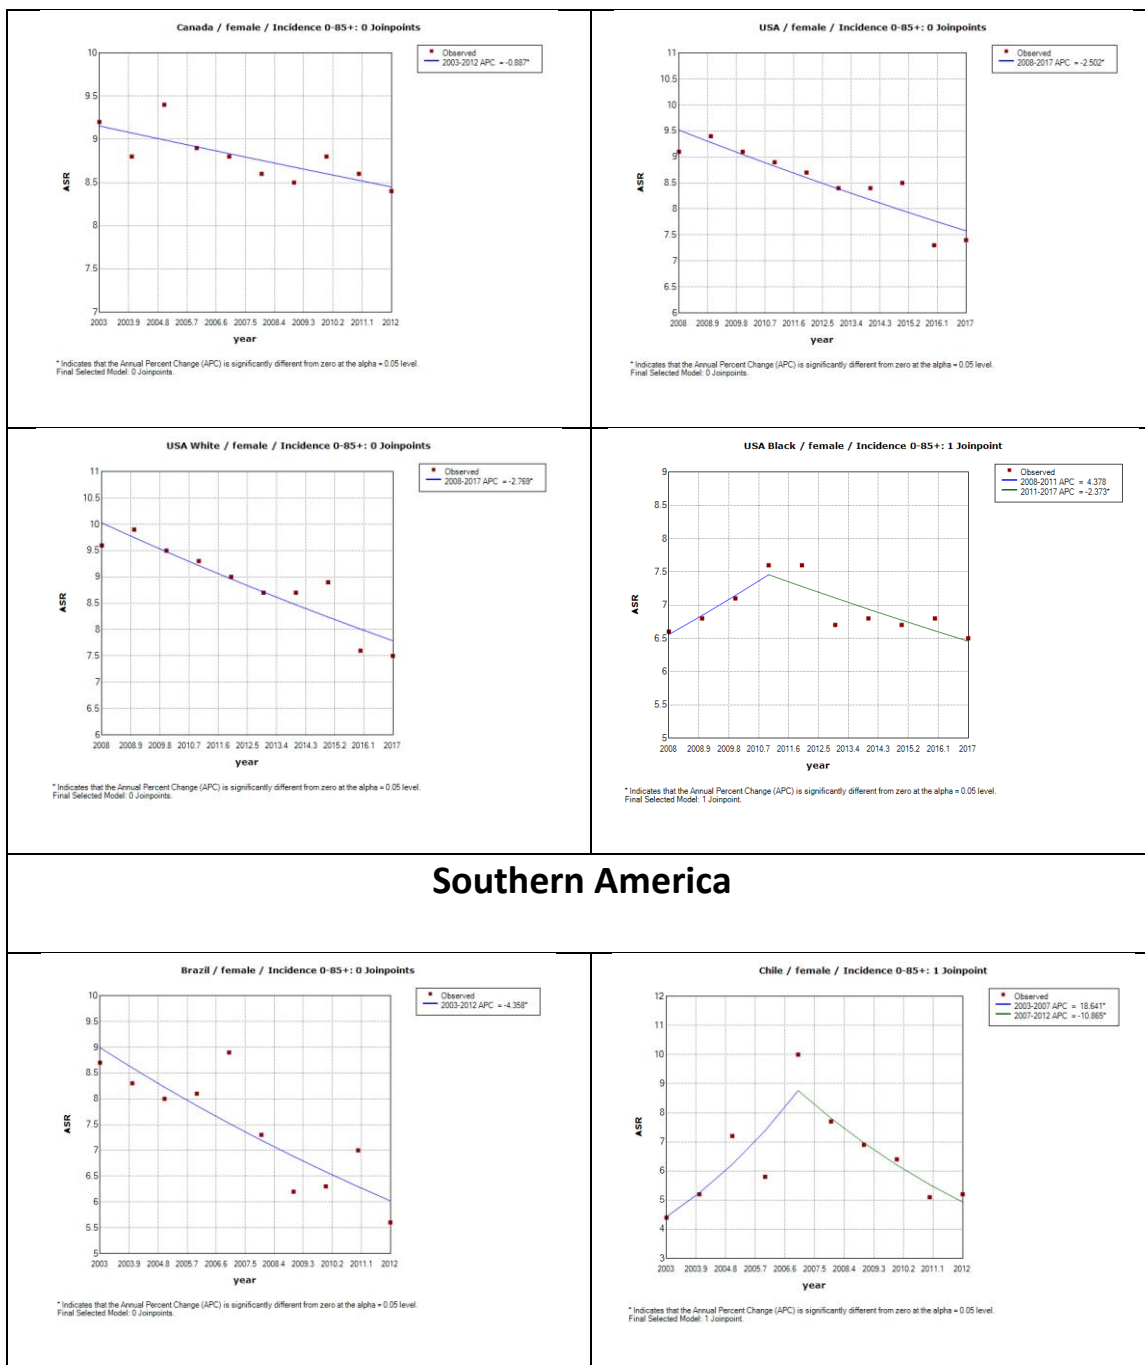



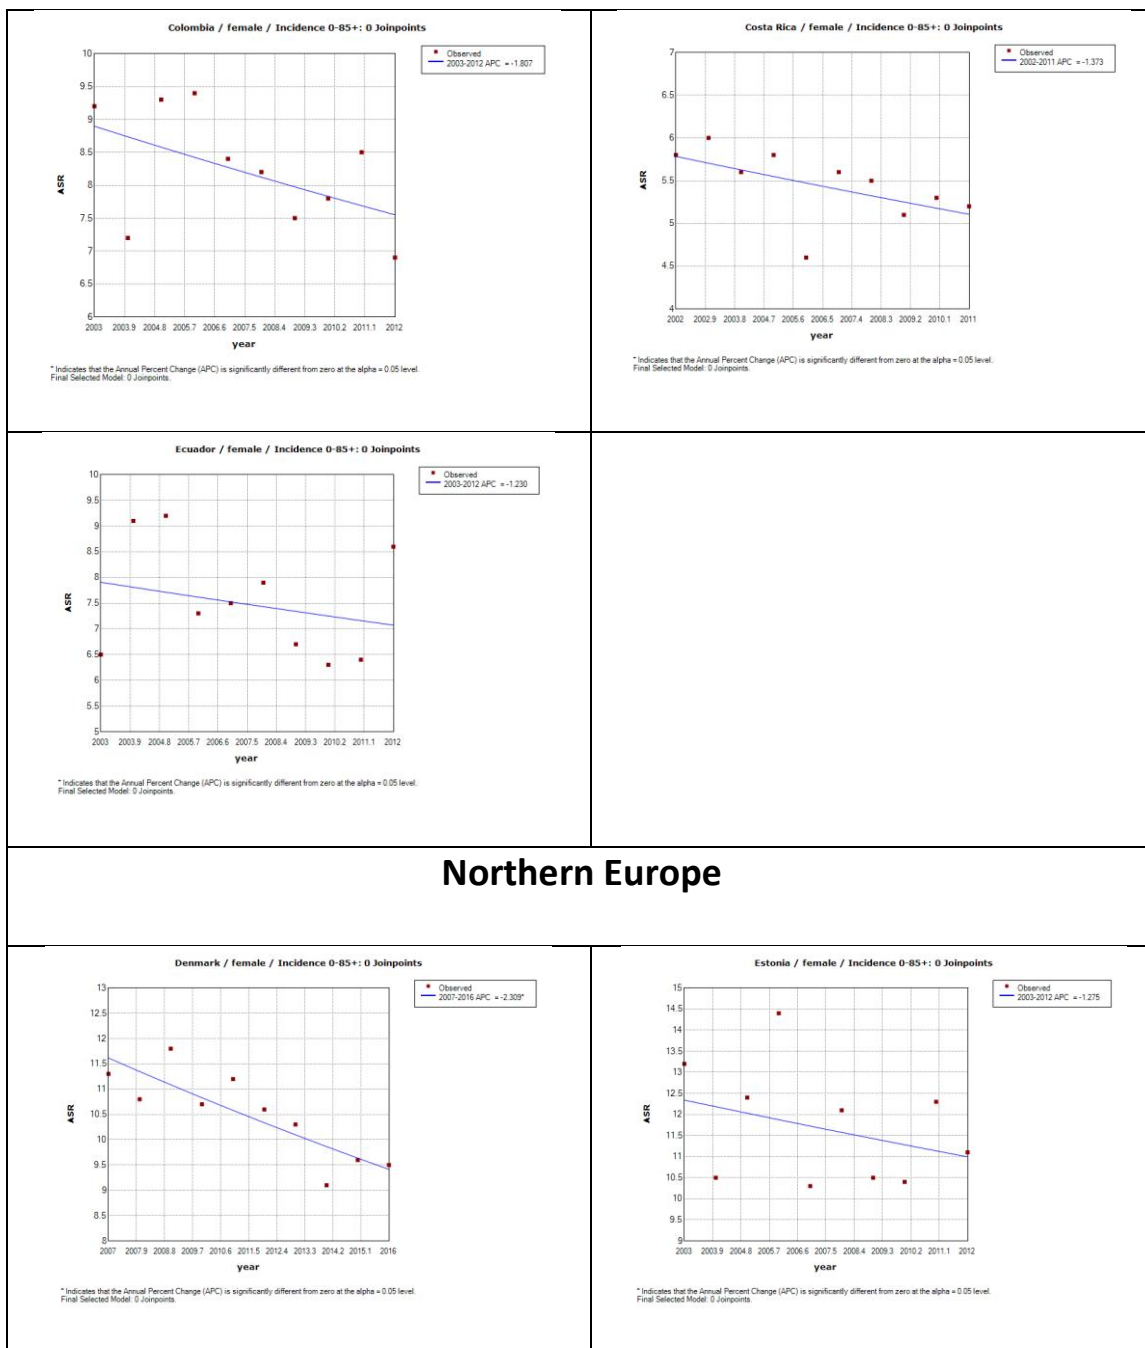

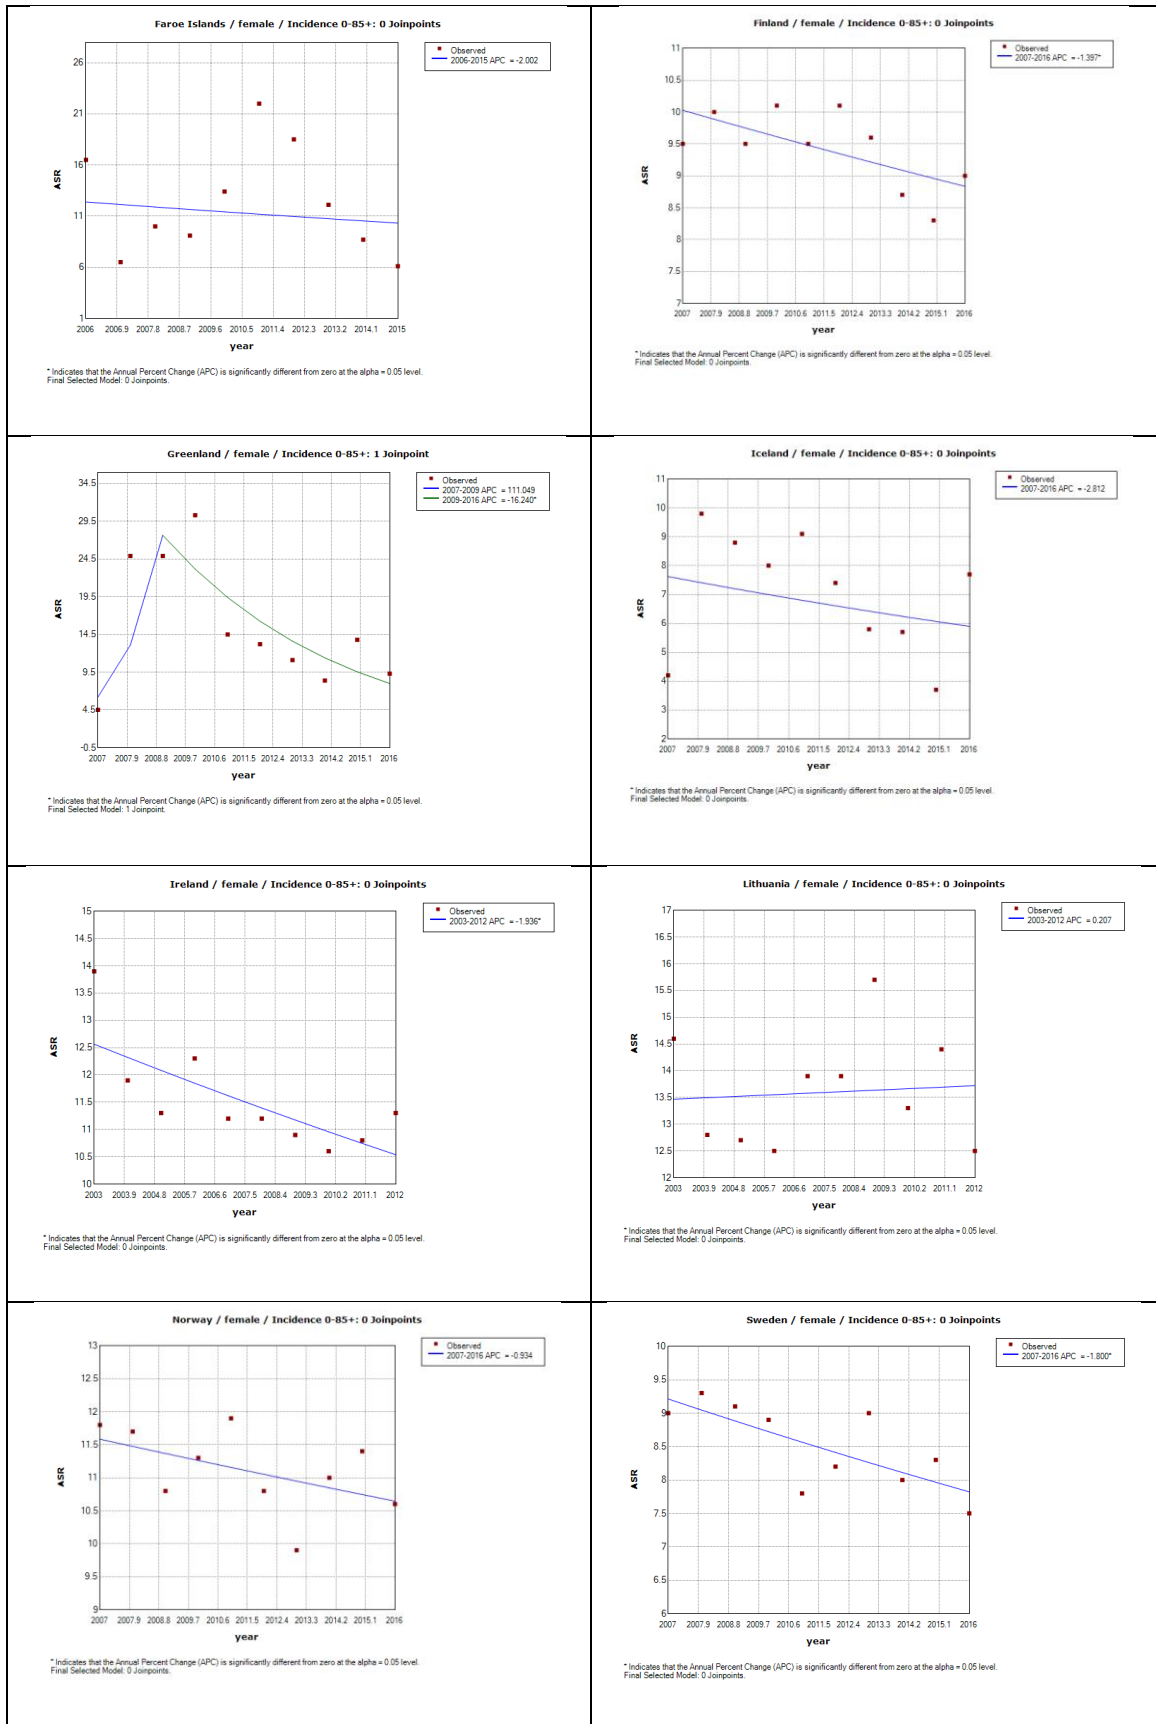

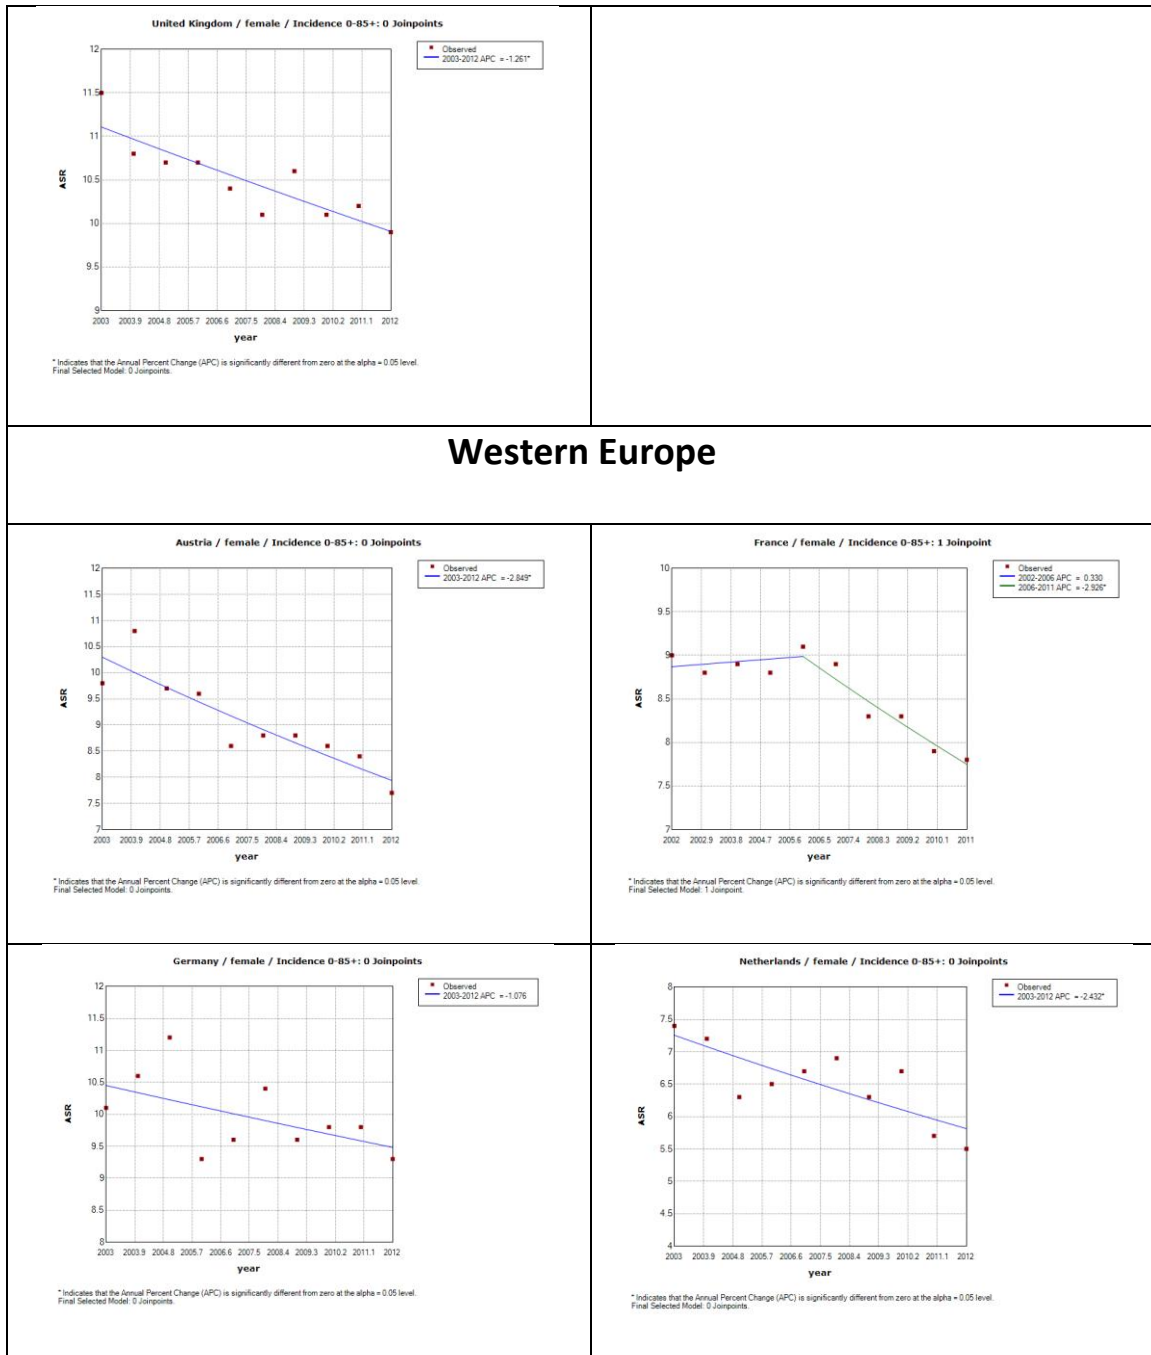

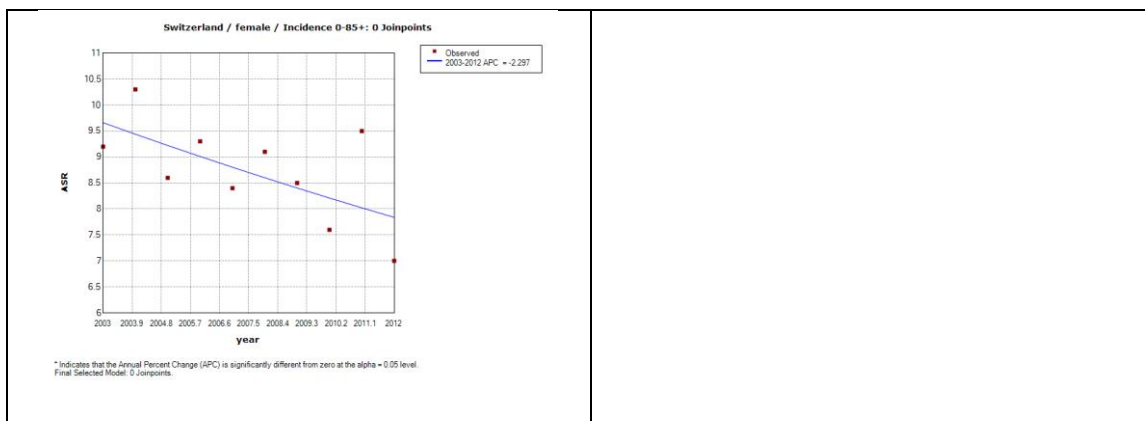

## Southern Europe

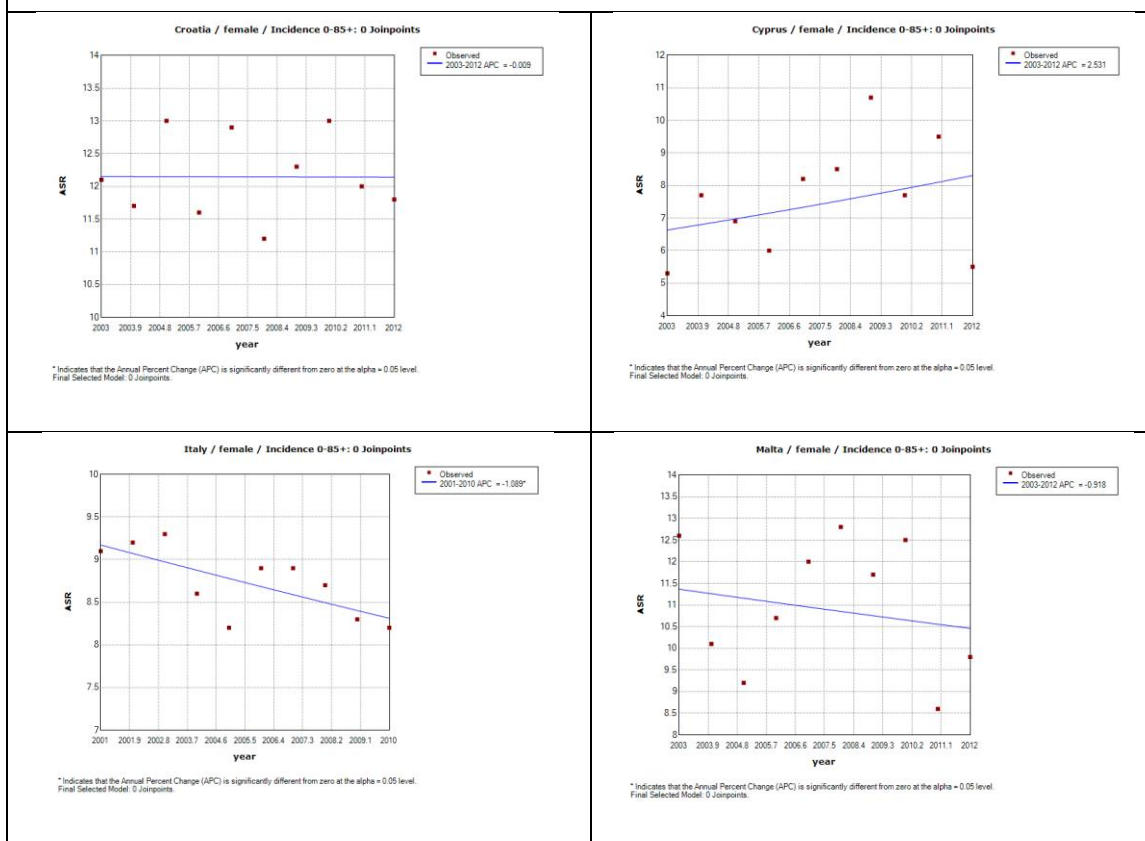

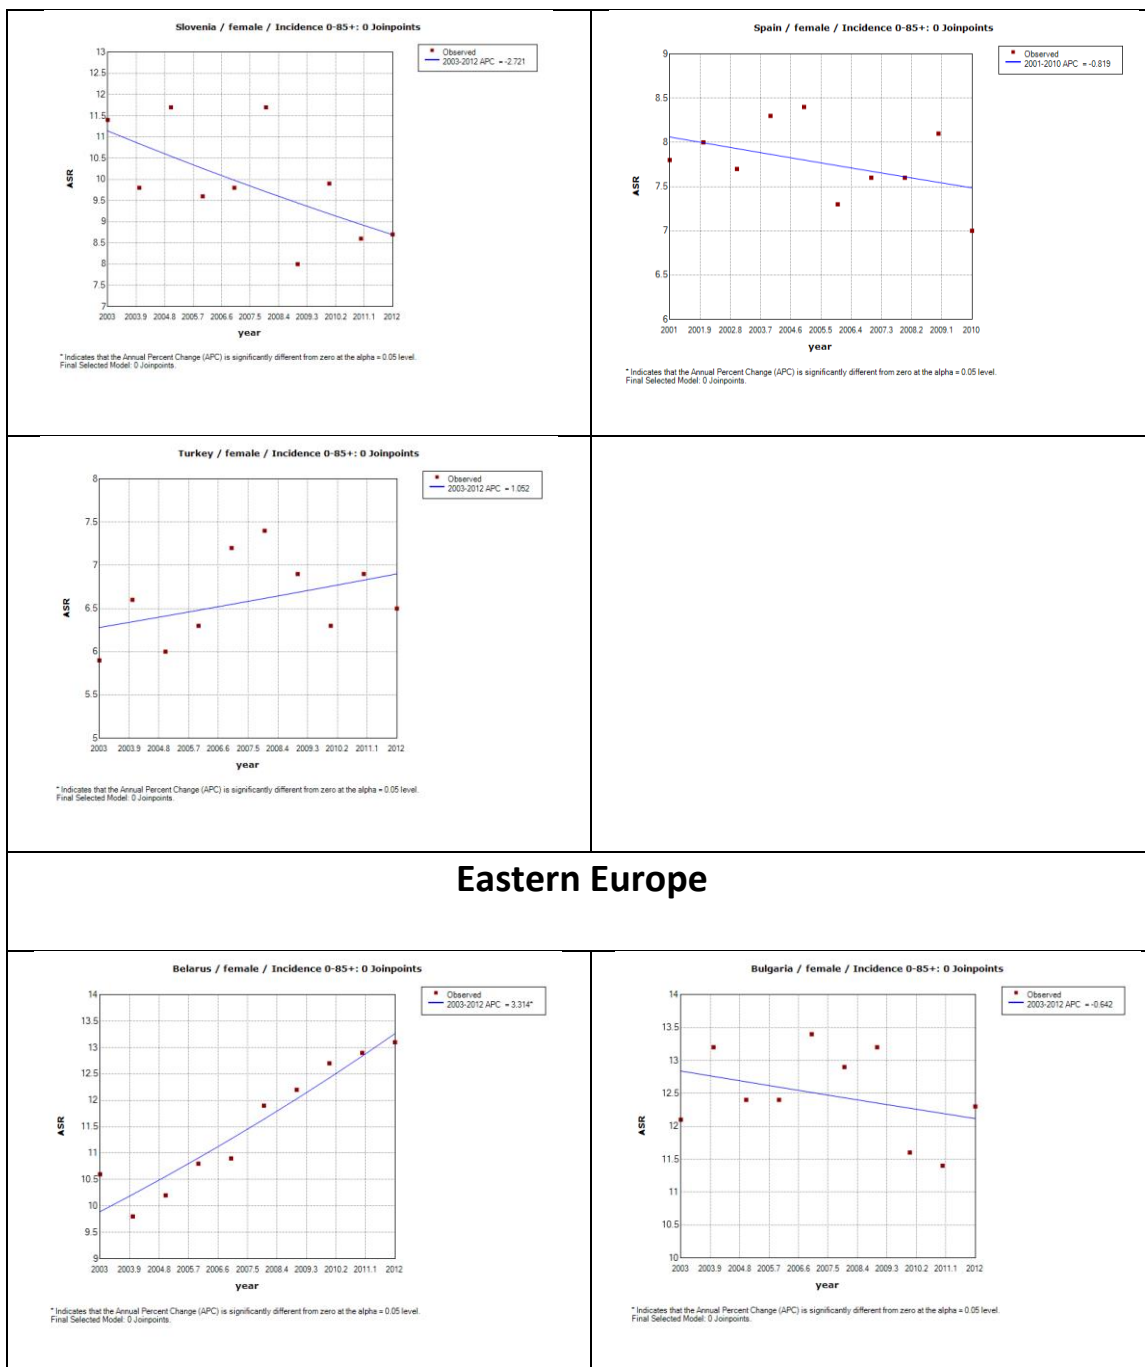

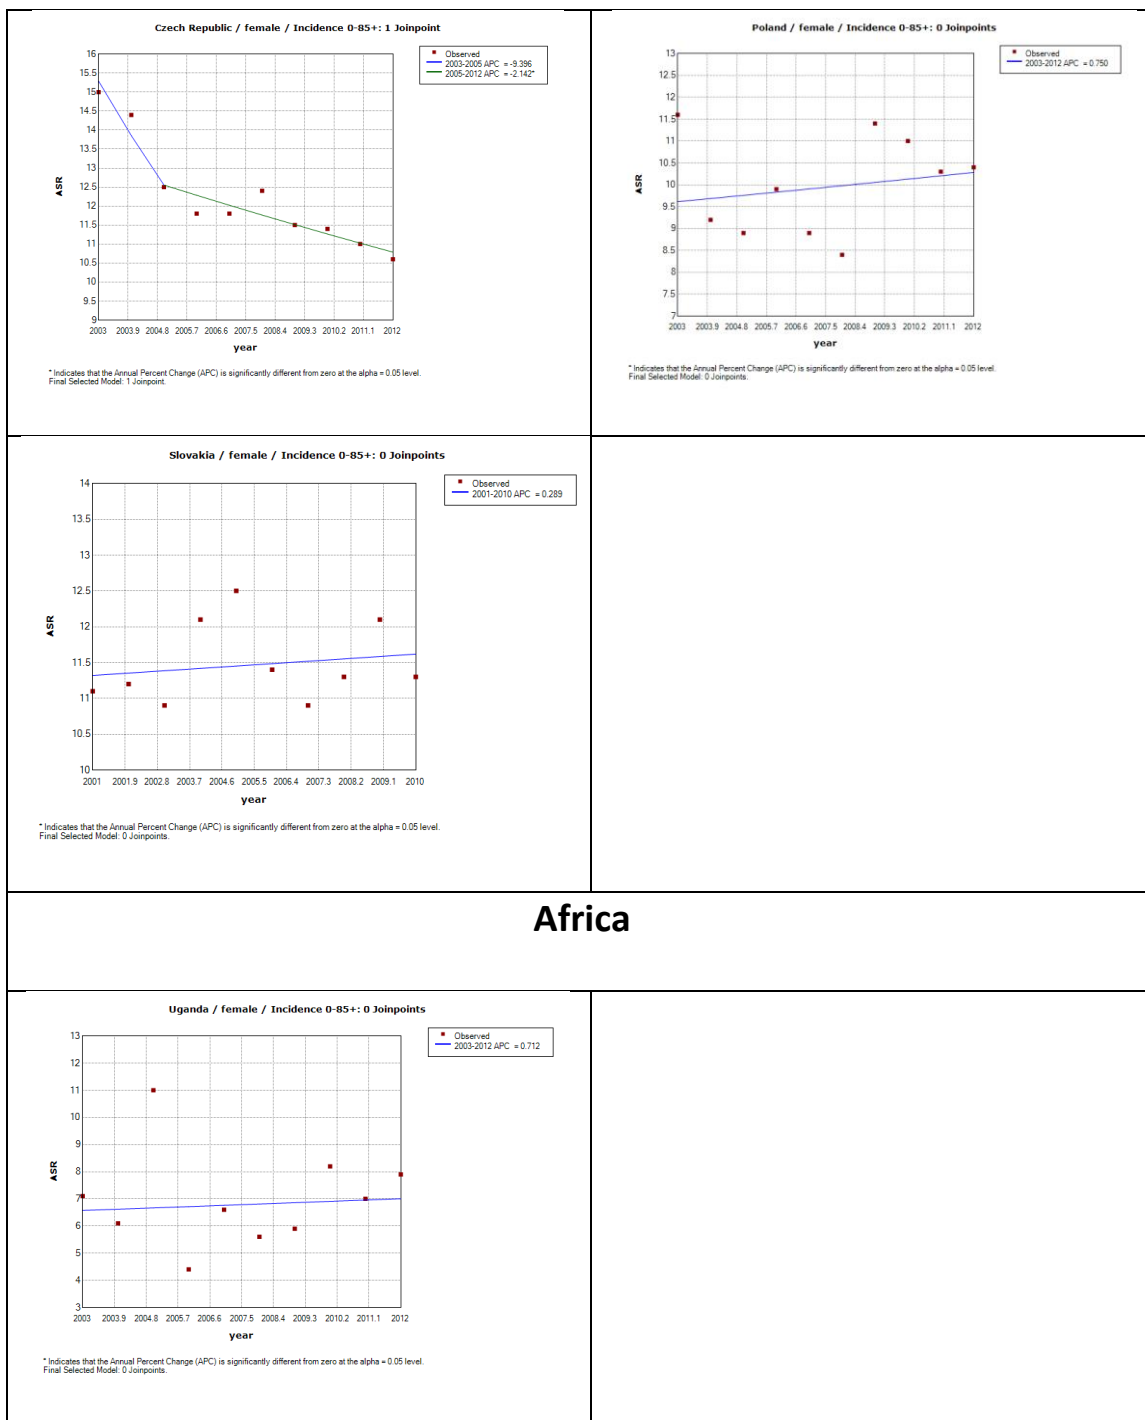

b.) Incidence female below 40 years old

## Asia

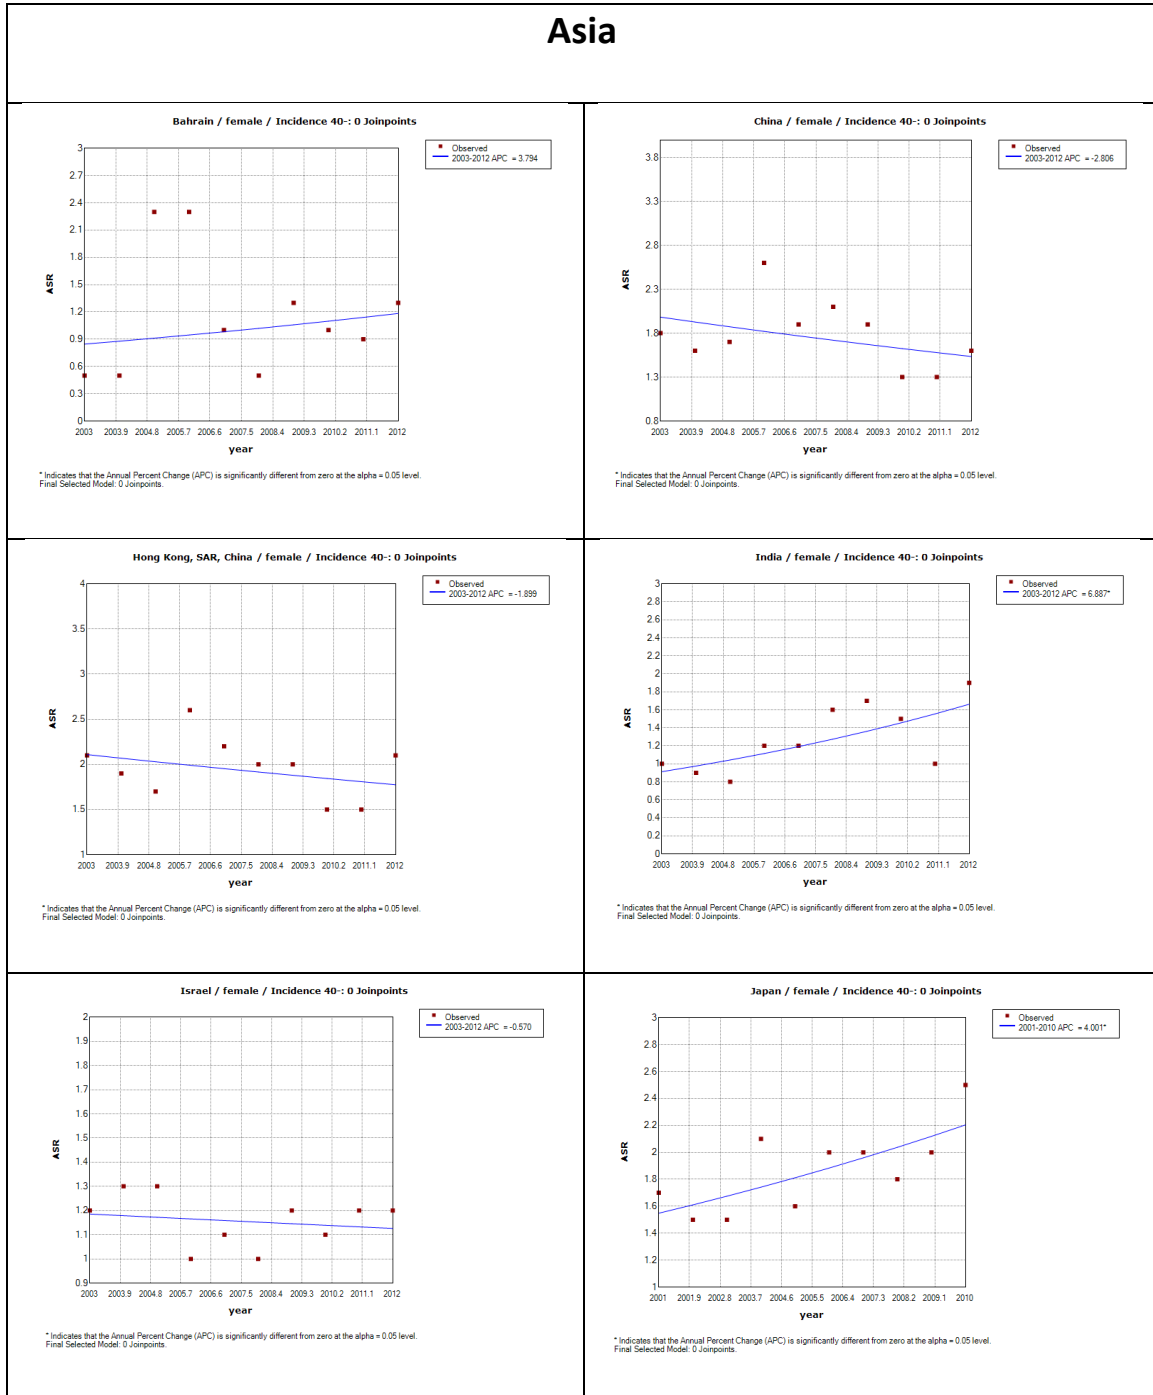

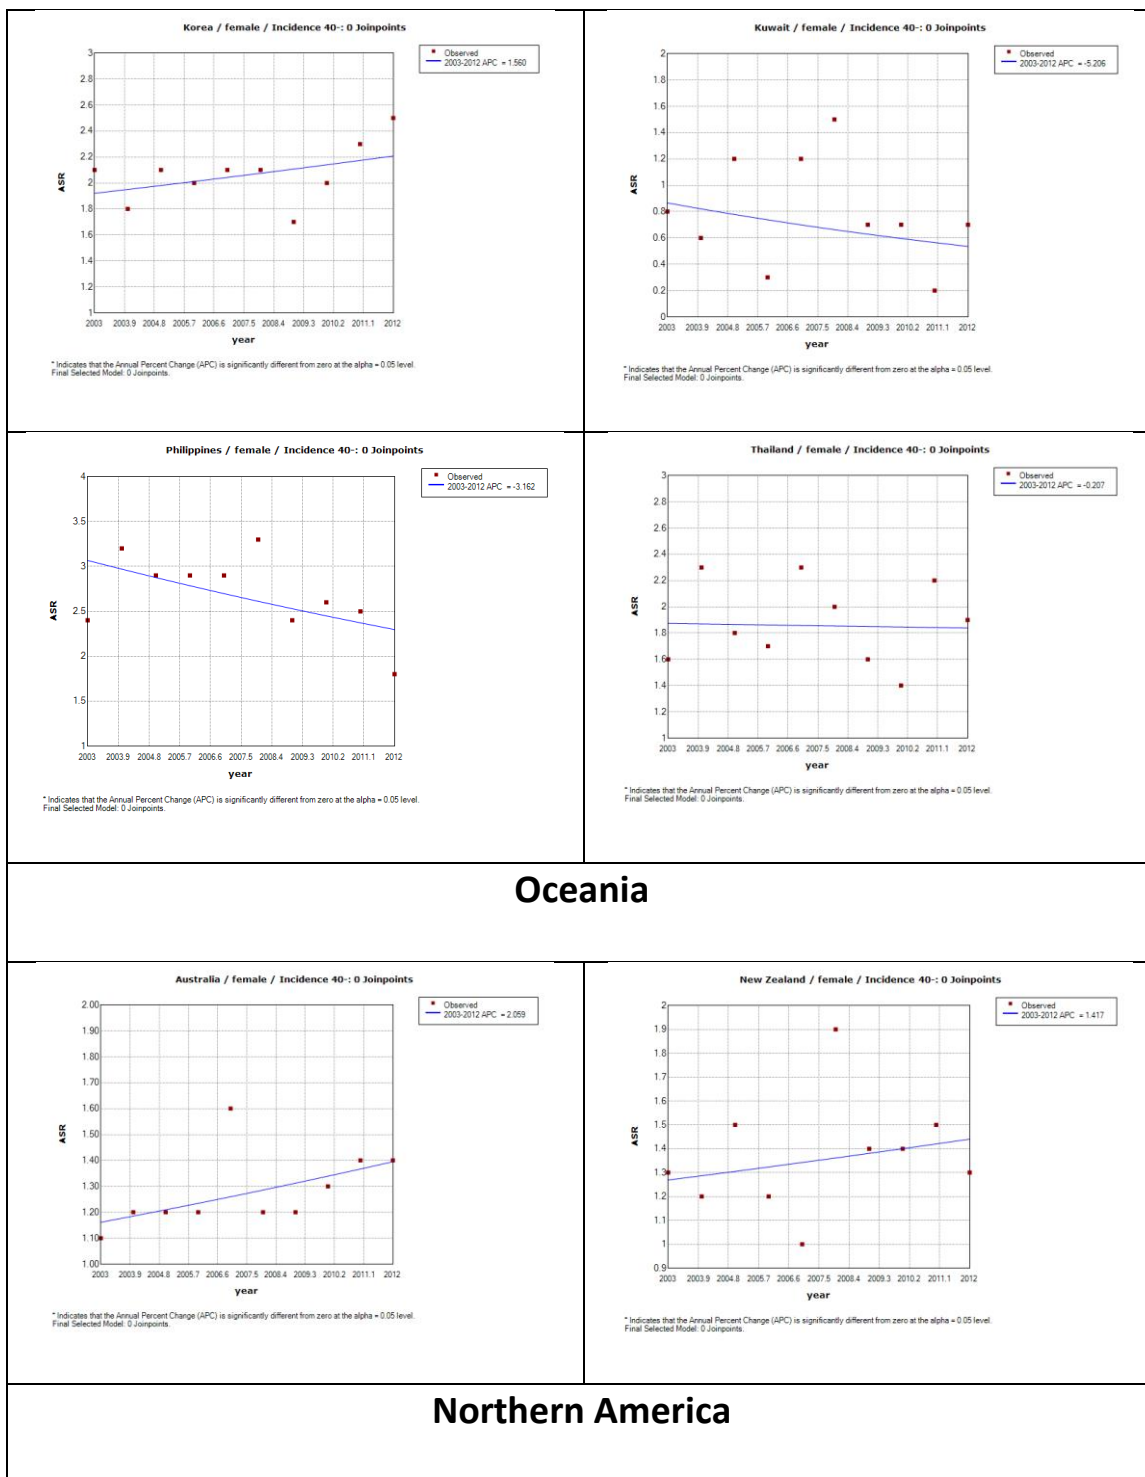



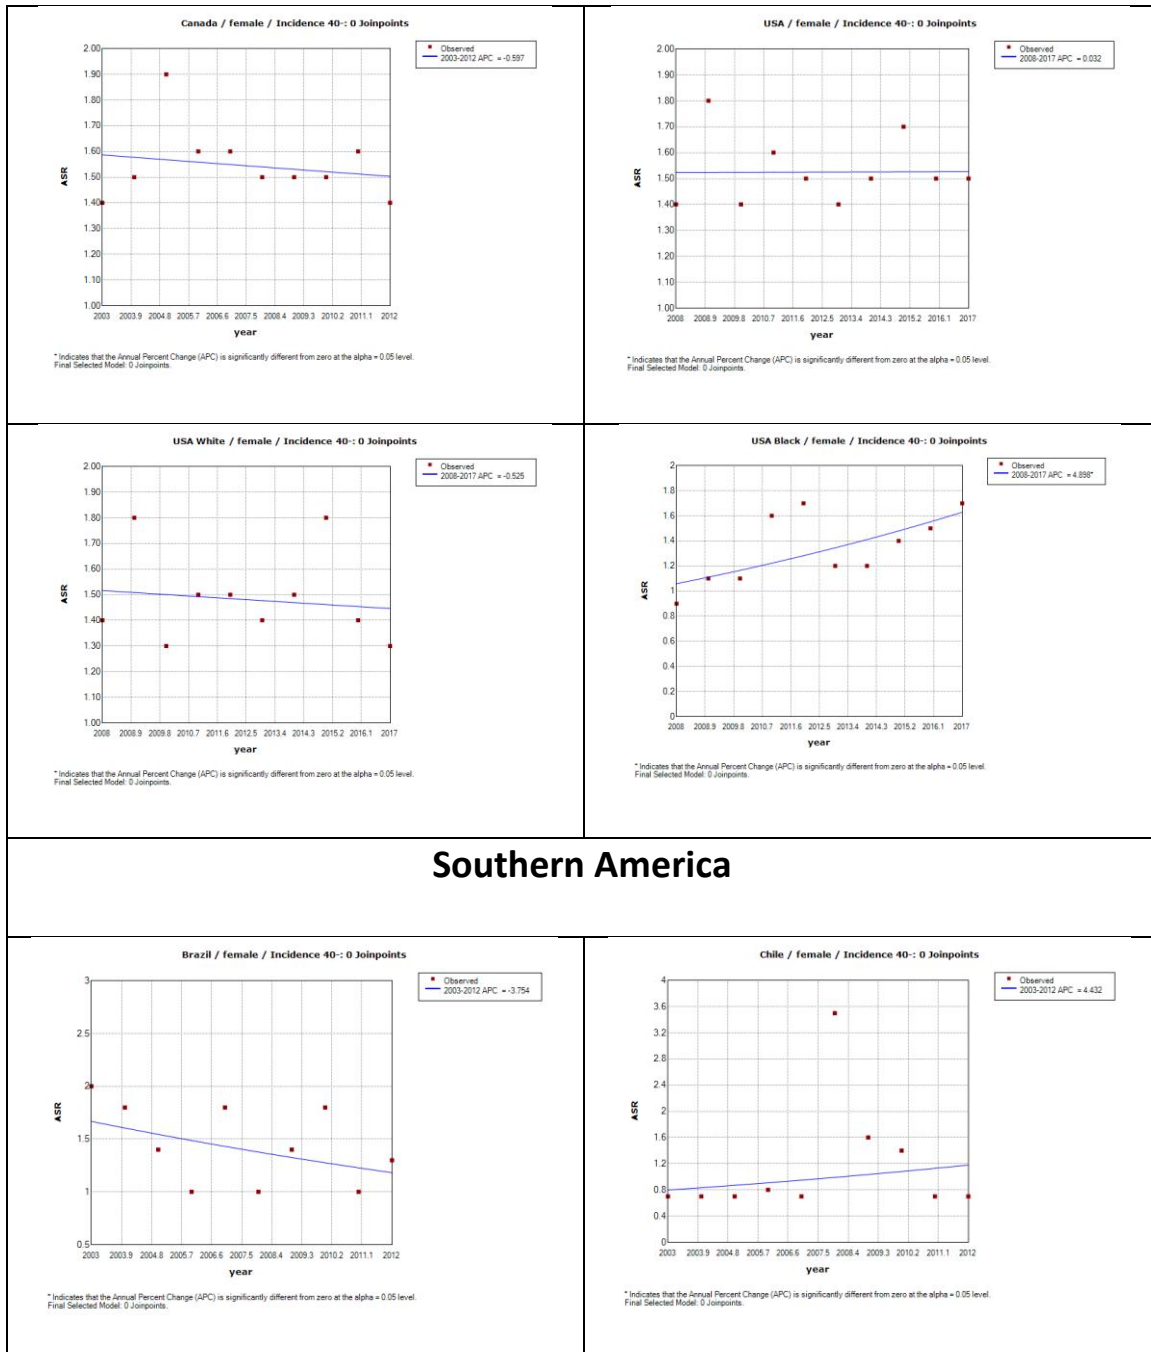

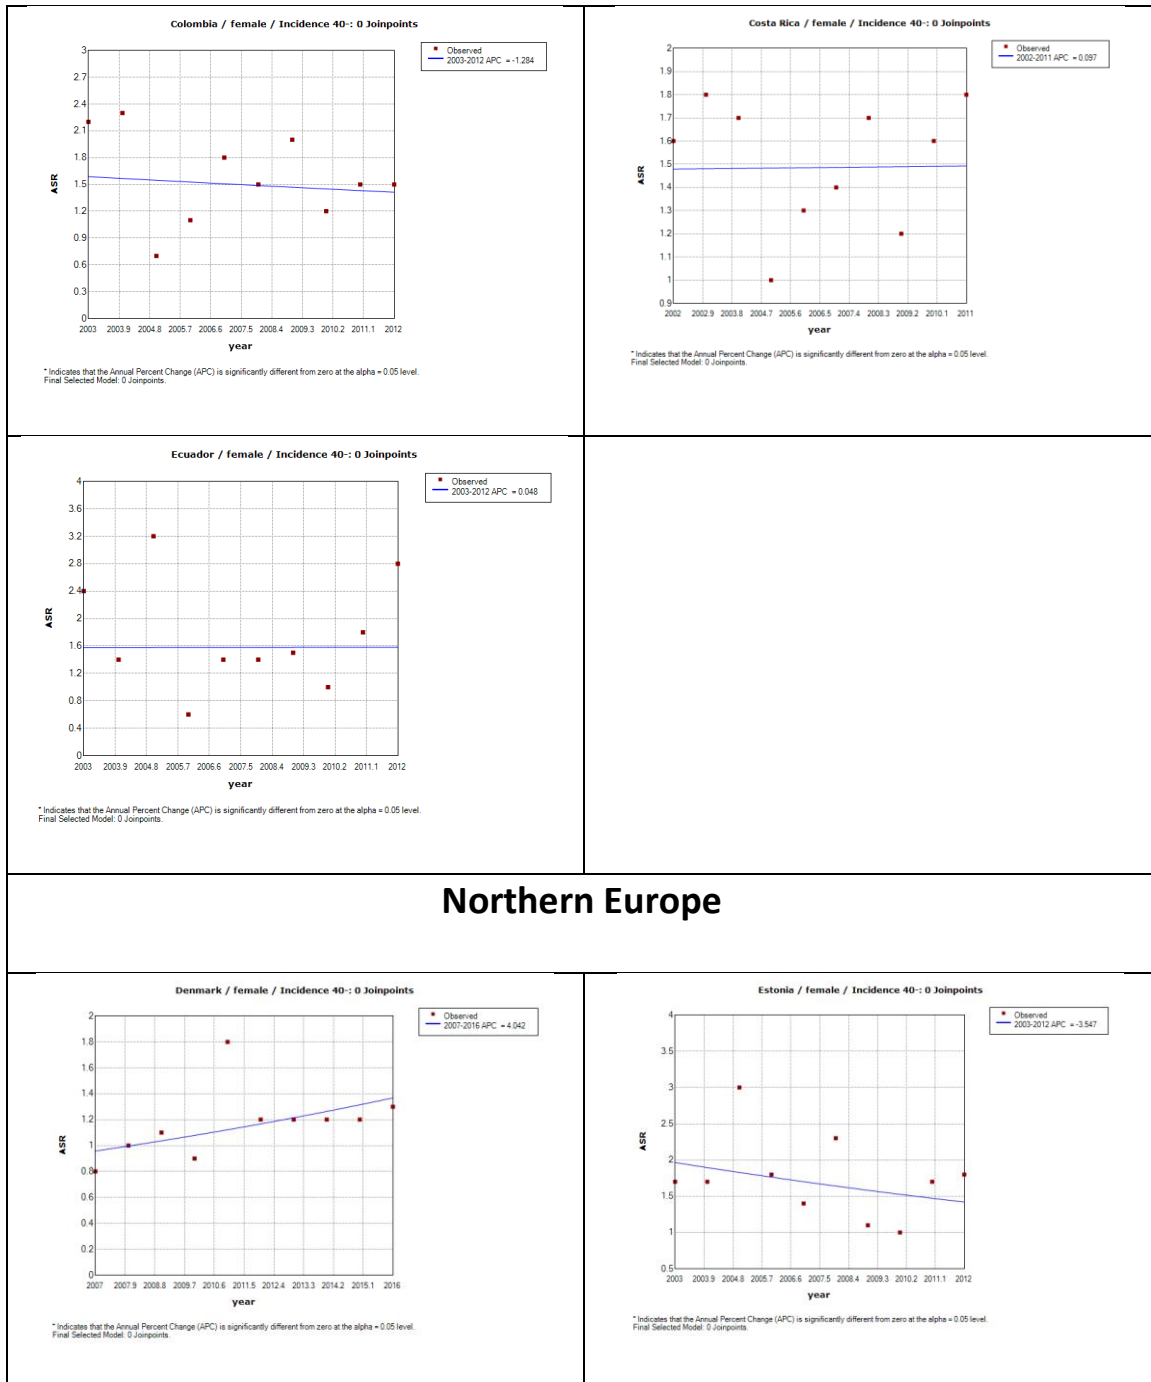

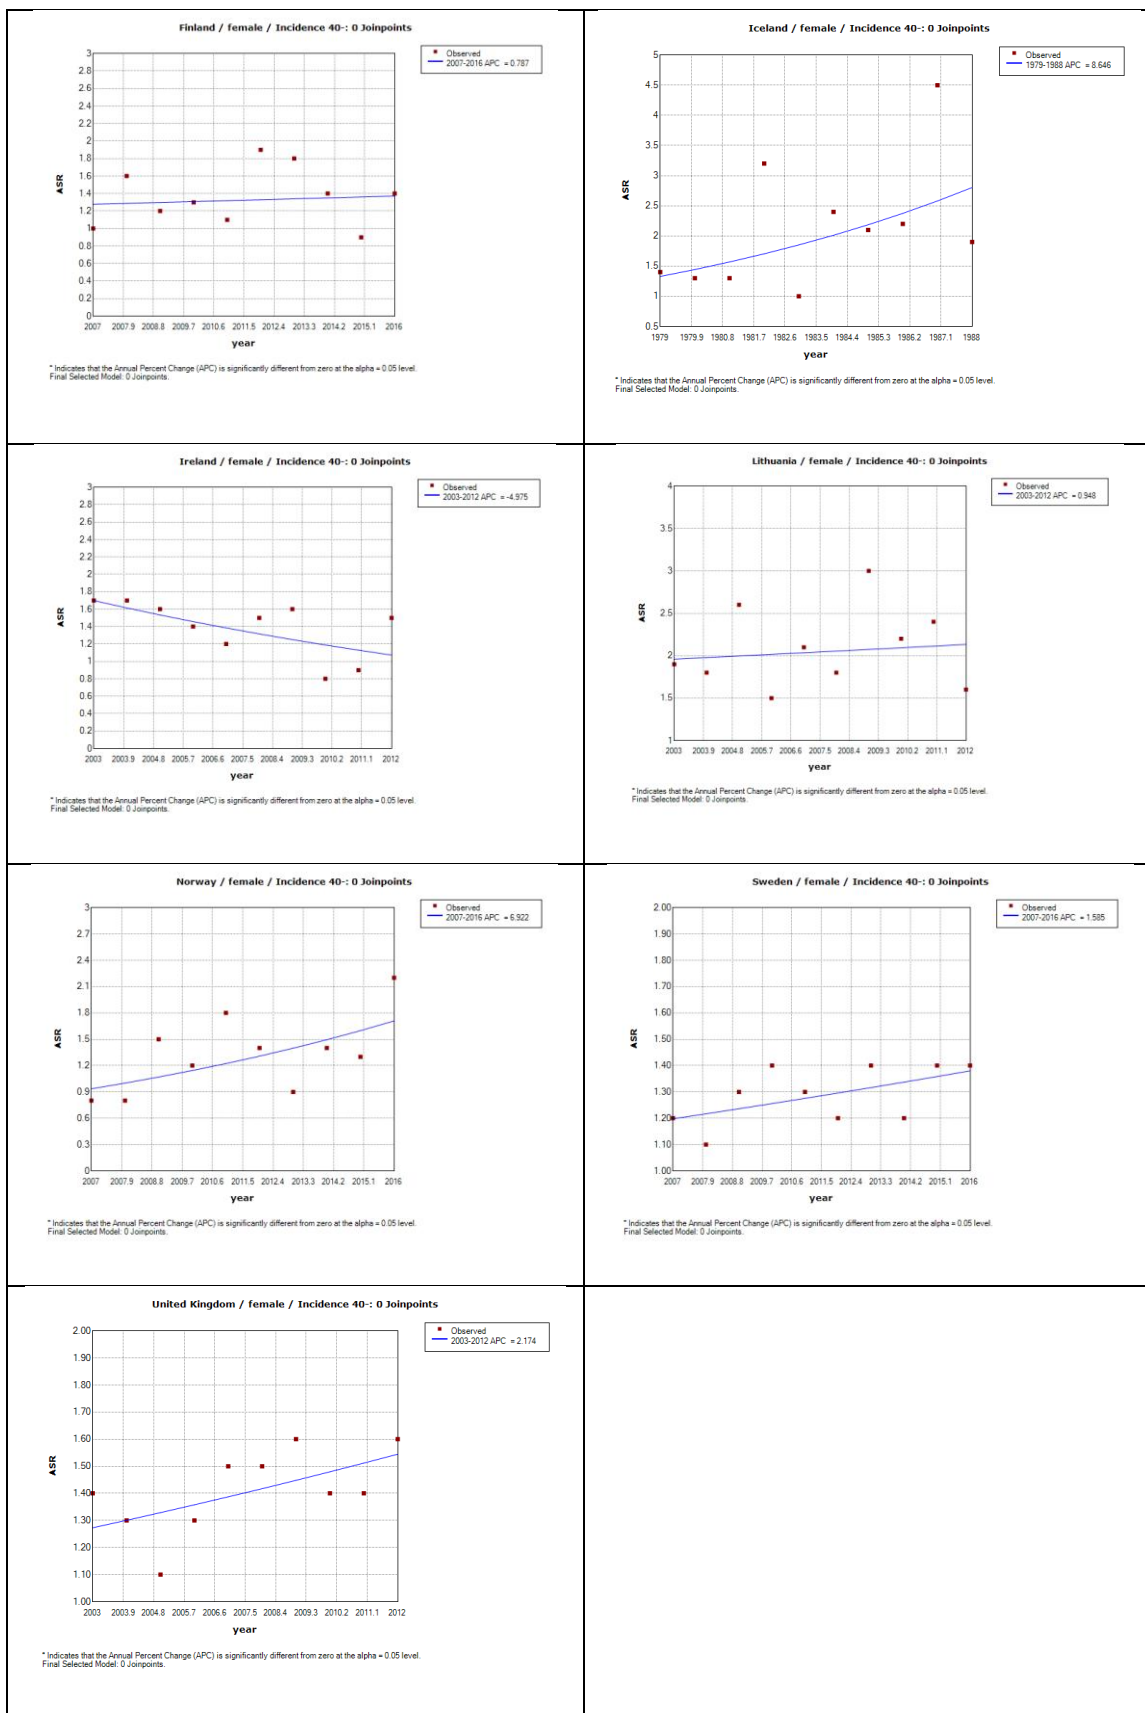

## Western Europe

Austria / female / Incidence 40+: 0 Joinspoints

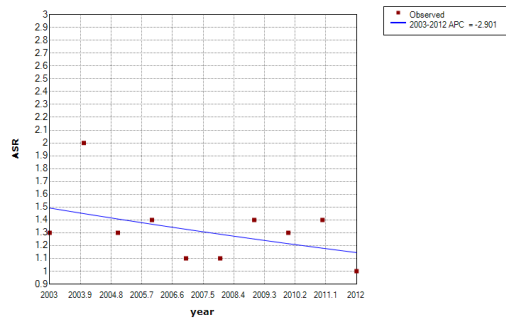

\* Indicates that the Annual Percent Change (APC) is significantly different from zero at the alpha = 0.05 level.  
Final Selected Model: 0 Joinspoints

France / female / Incidence 40+: 0 Joinspoints

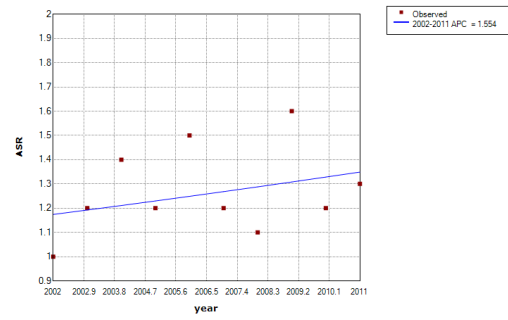

\* Indicates that the Annual Percent Change (APC) is significantly different from zero at the alpha = 0.05 level.  
Final Selected Model: 0 Joinspoints

Germany / female / Incidence 40+: 0 Joinspoints

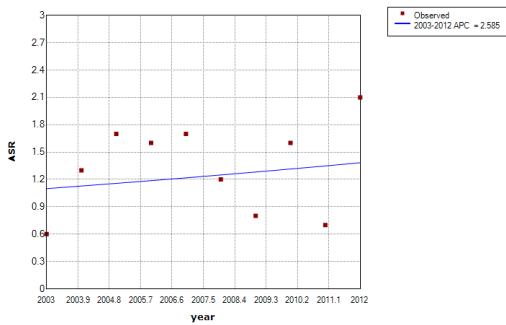

\* Indicates that the Annual Percent Change (APC) is significantly different from zero at the alpha = 0.05 level.  
Final Selected Model: 0 Joinspoints

Netherlands / female / Incidence 40+: 0 Joinspoints

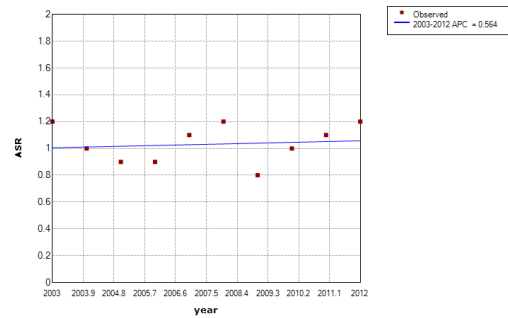

\* Indicates that the Annual Percent Change (APC) is significantly different from zero at the alpha = 0.05 level.  
Final Selected Model: 0 Joinspoints

Switzerland / female / Incidence 40+: 0 Joinspoints

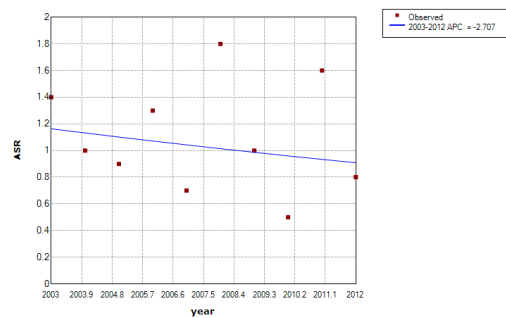

\* Indicates that the Annual Percent Change (APC) is significantly different from zero at the alpha = 0.05 level.  
Final Selected Model: 0 Joinspoints

## Southern Europe

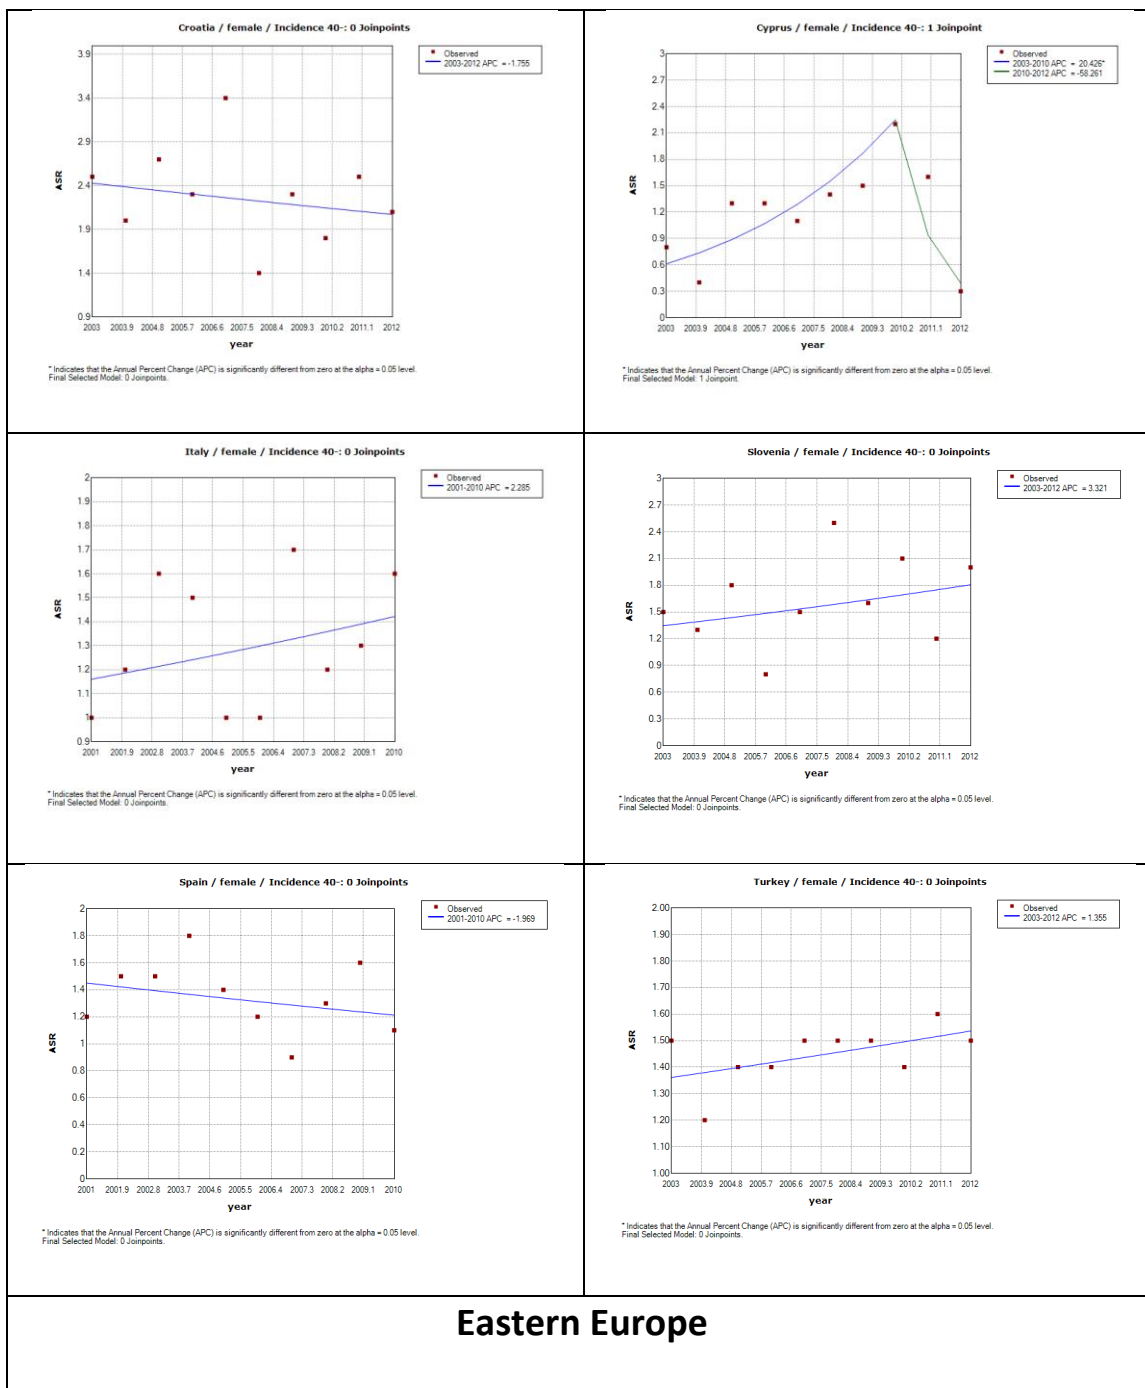

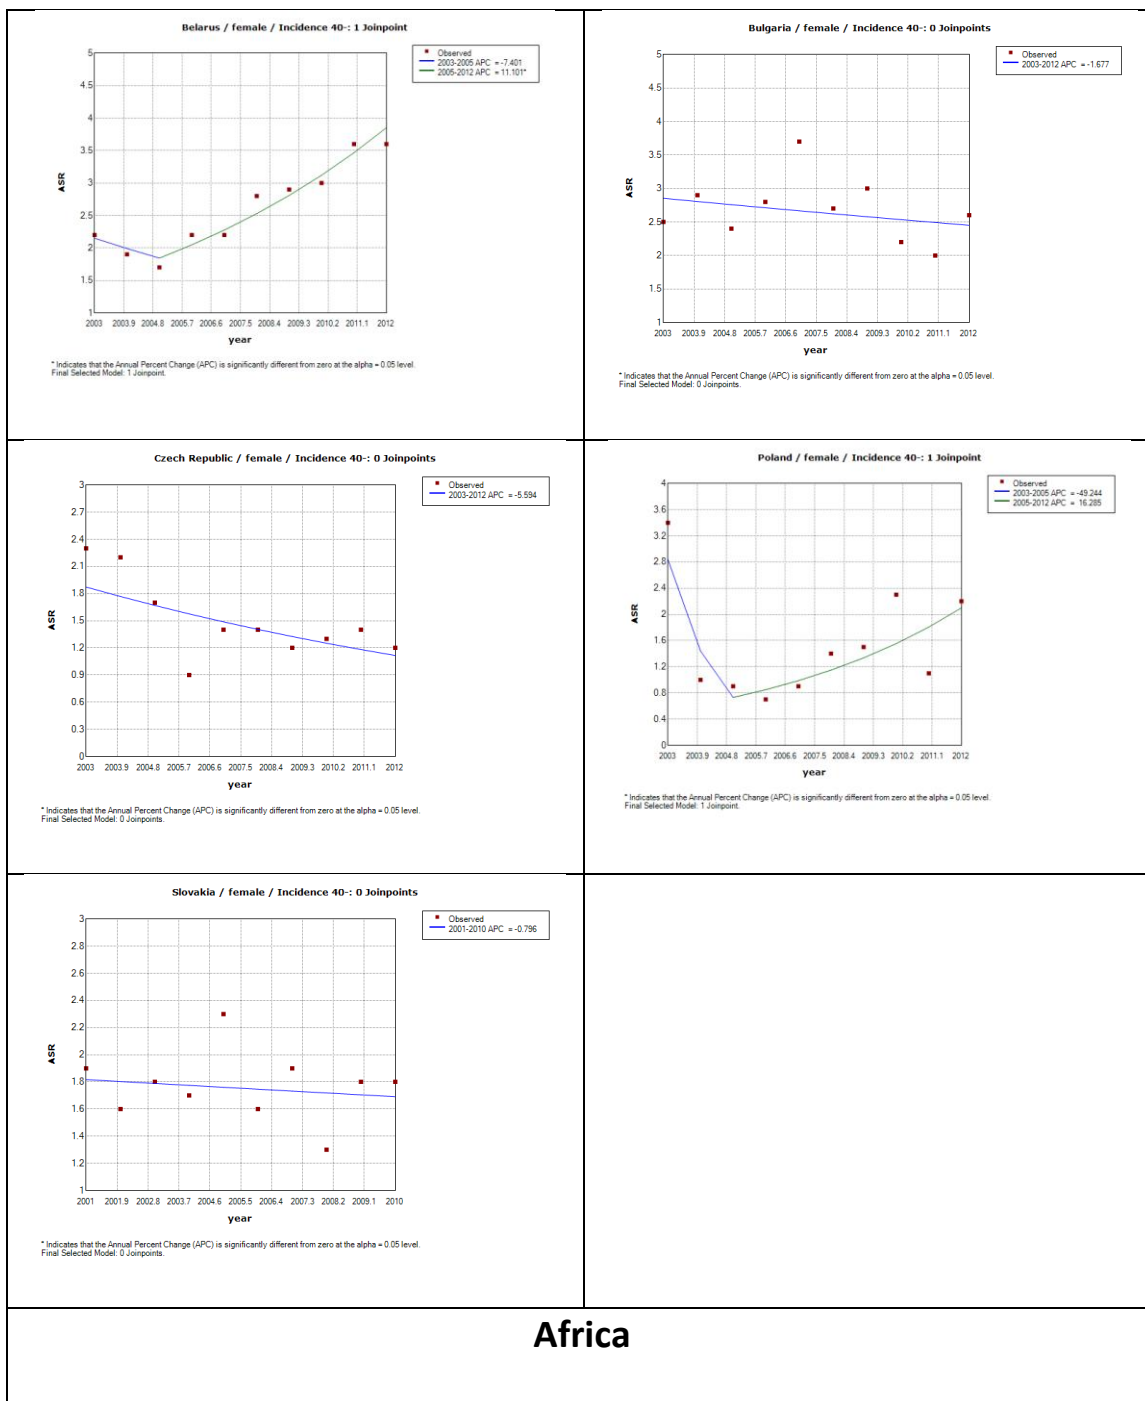

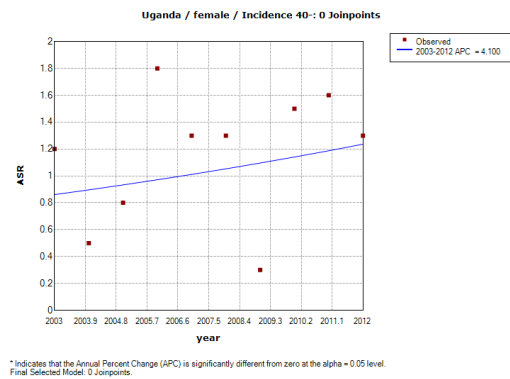

c.) Incidence female below 50 years old

## Asia

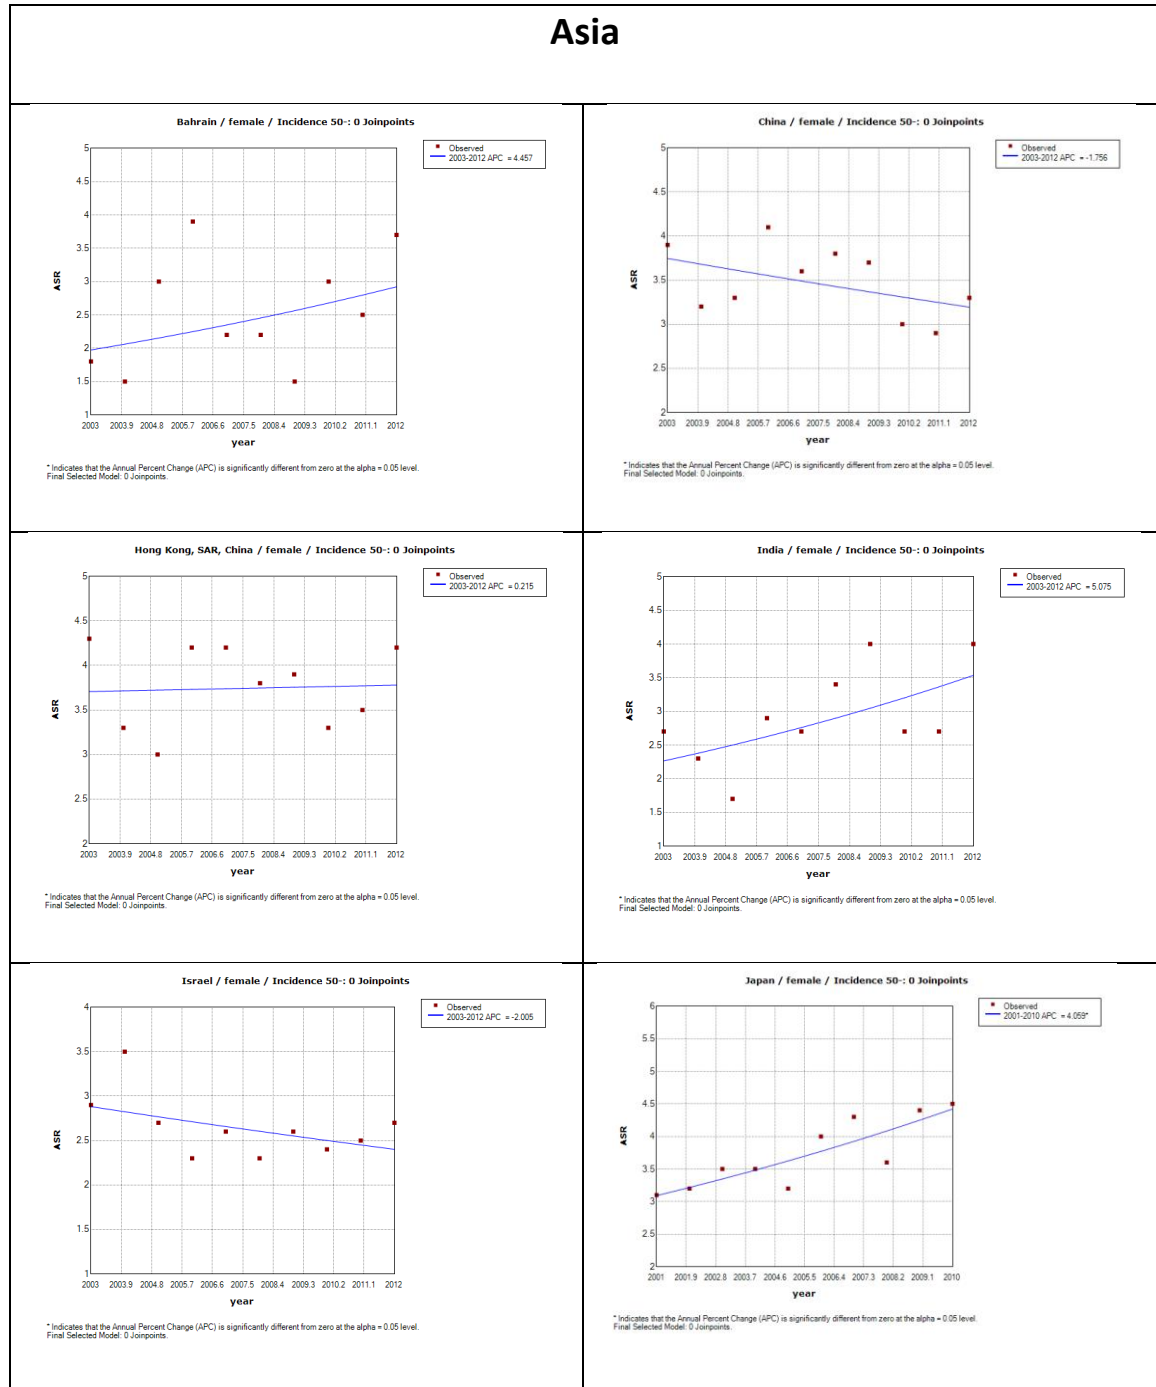



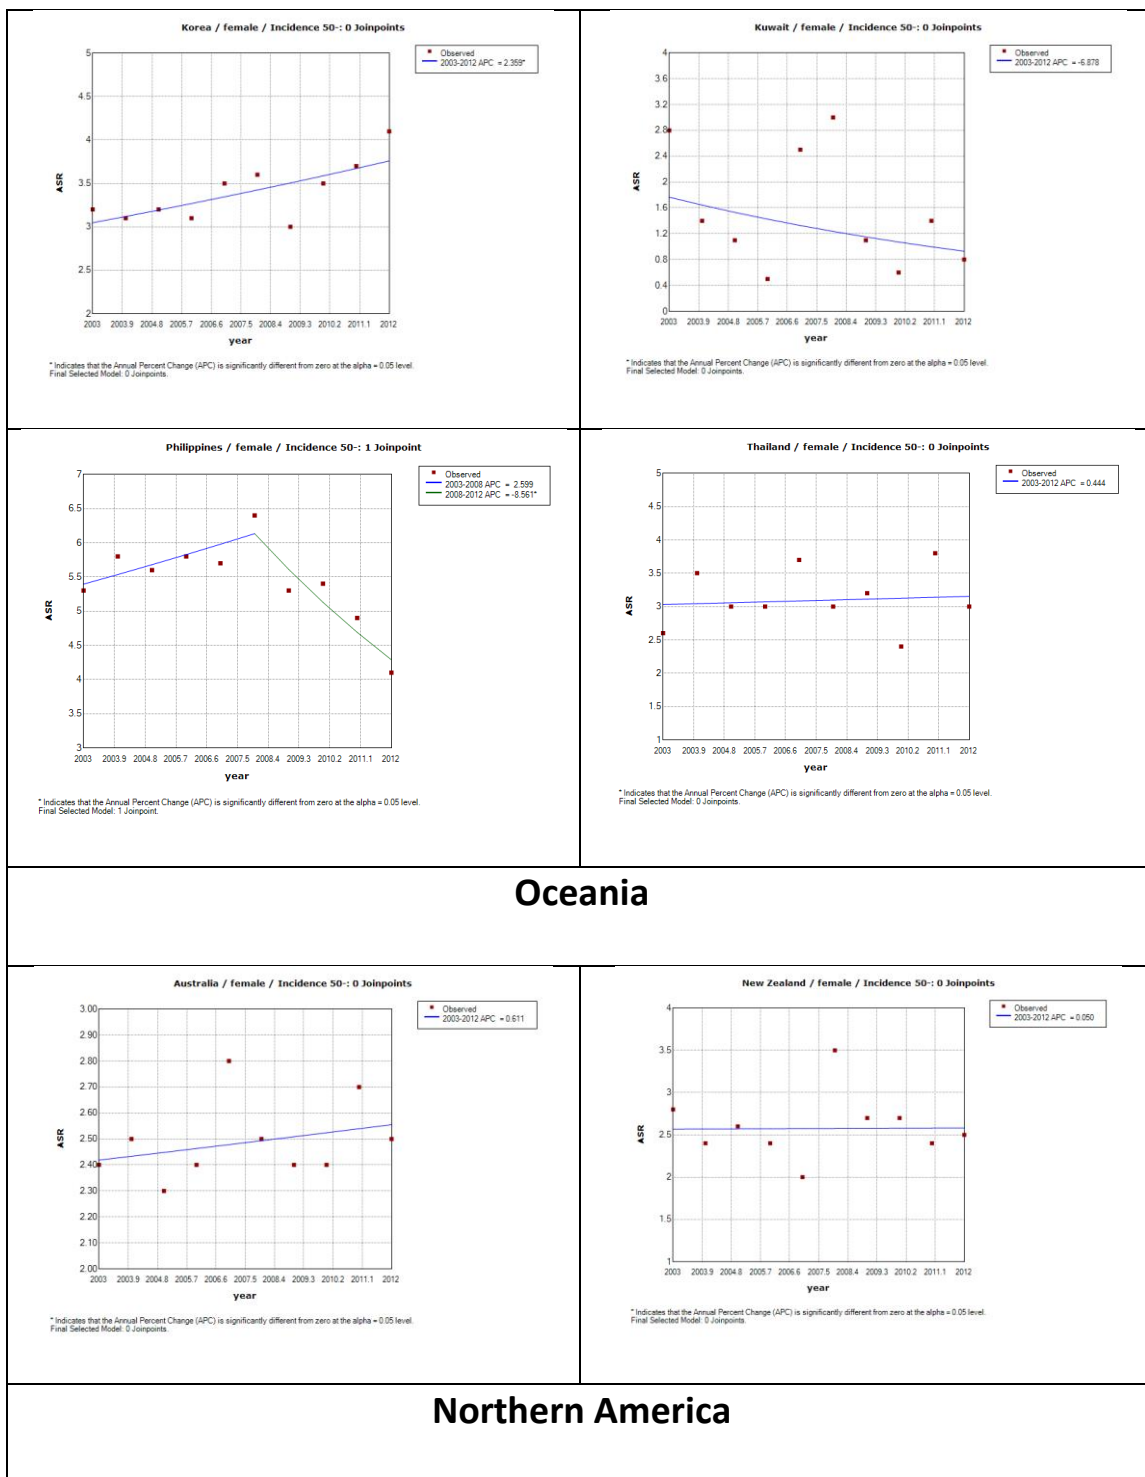

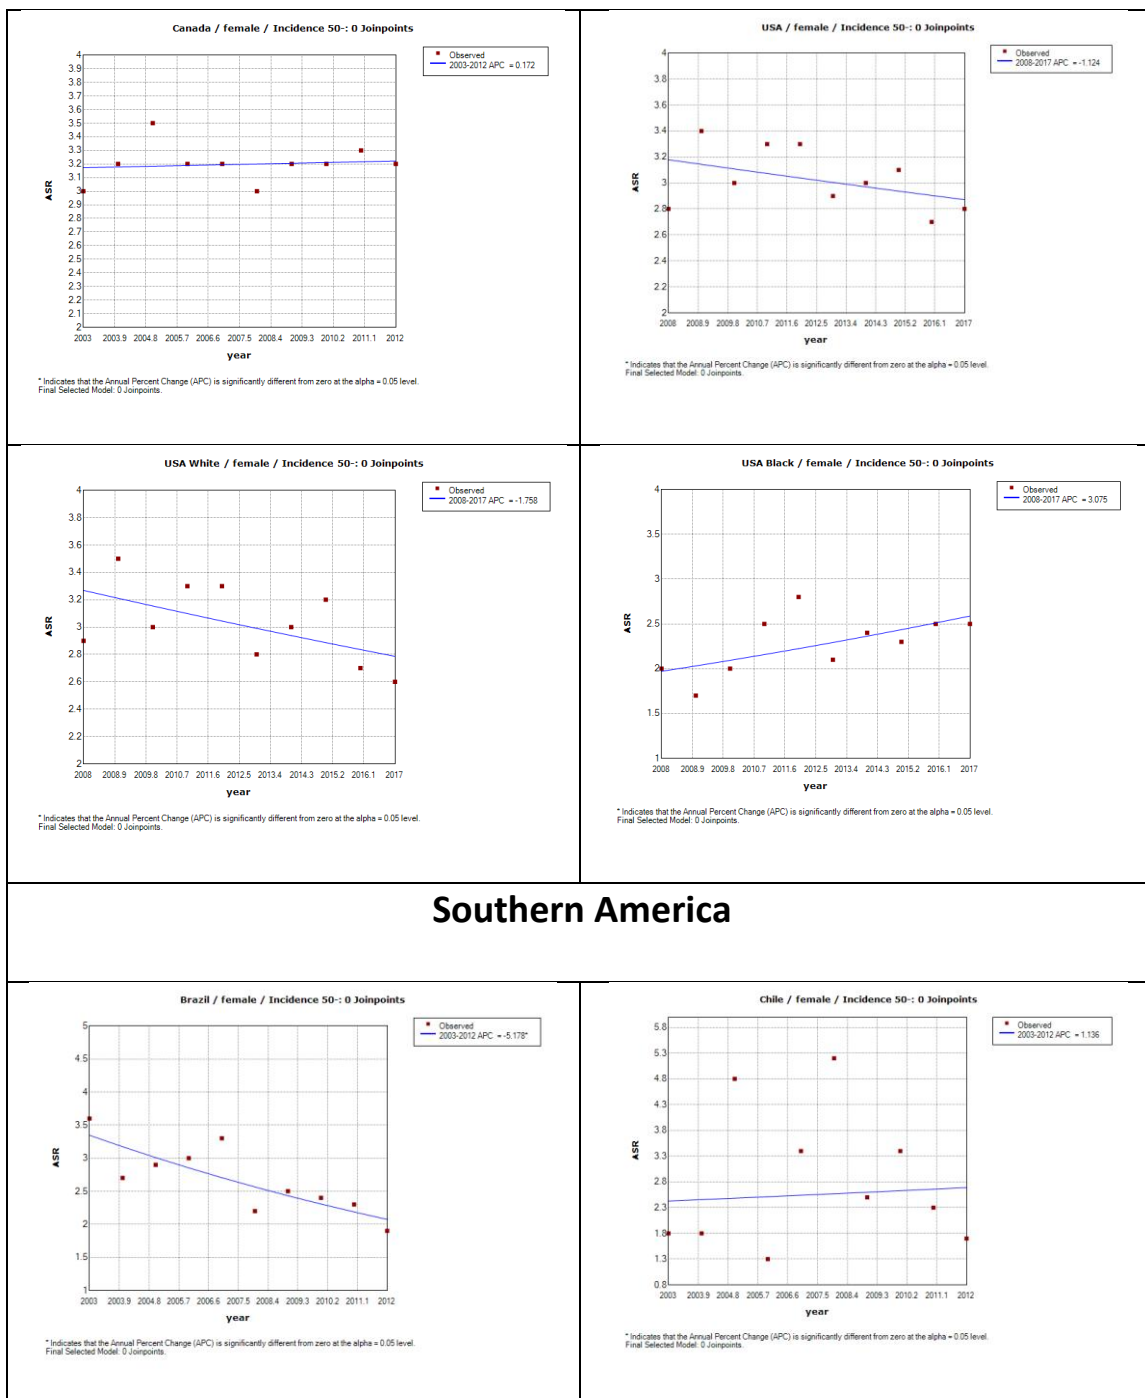

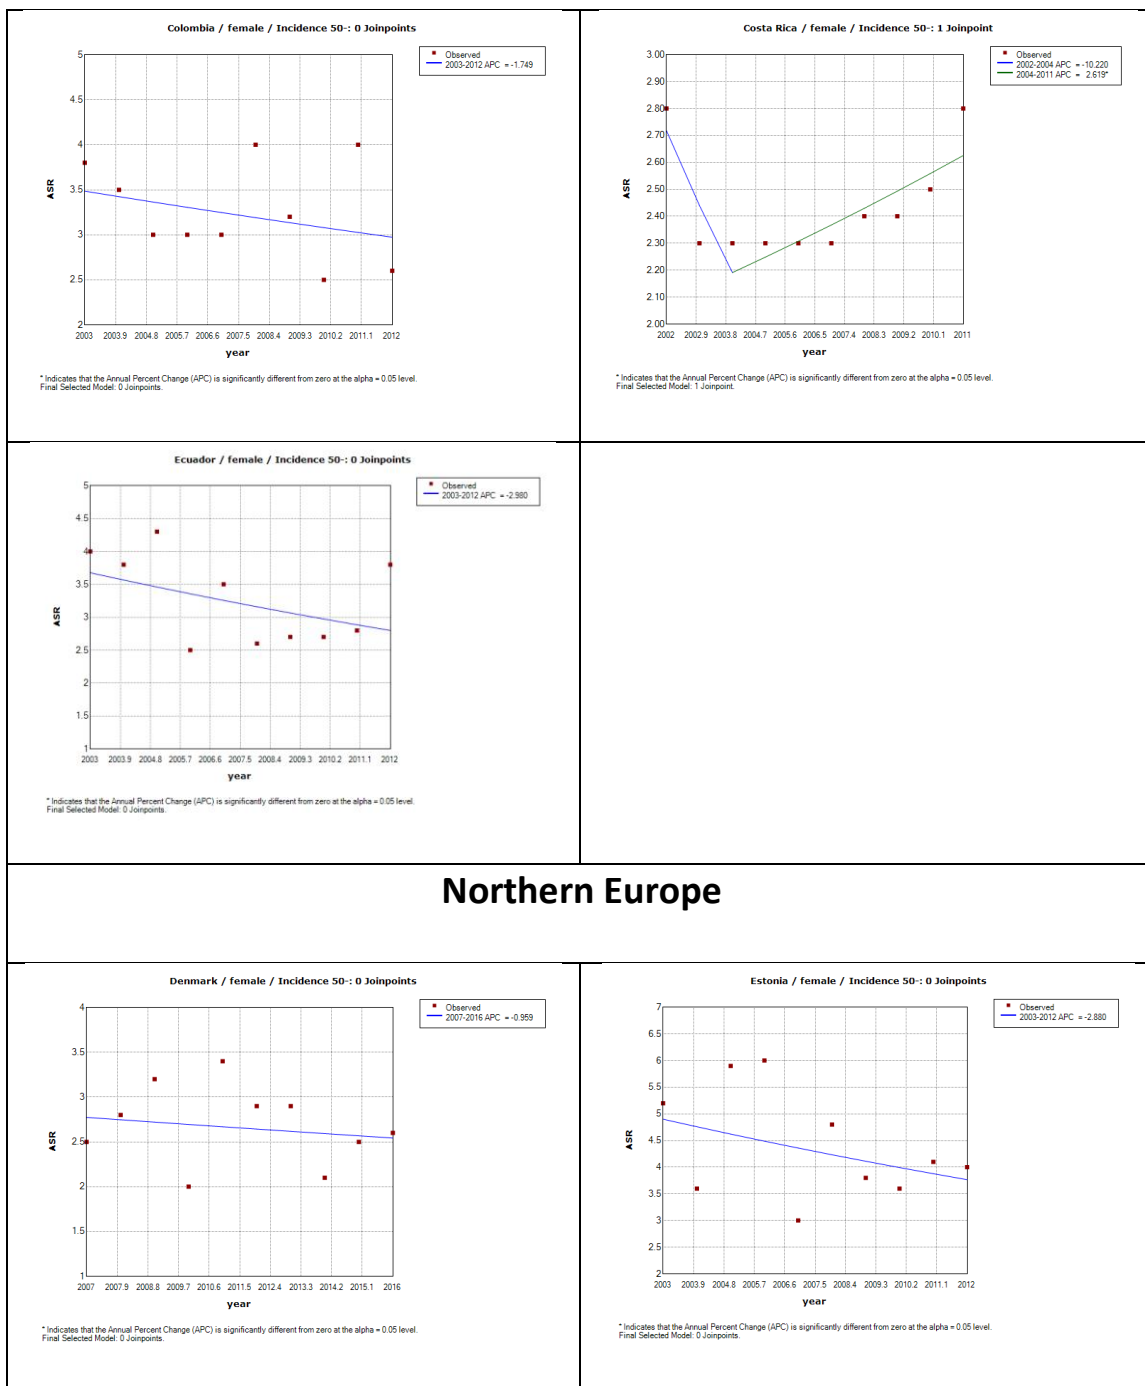

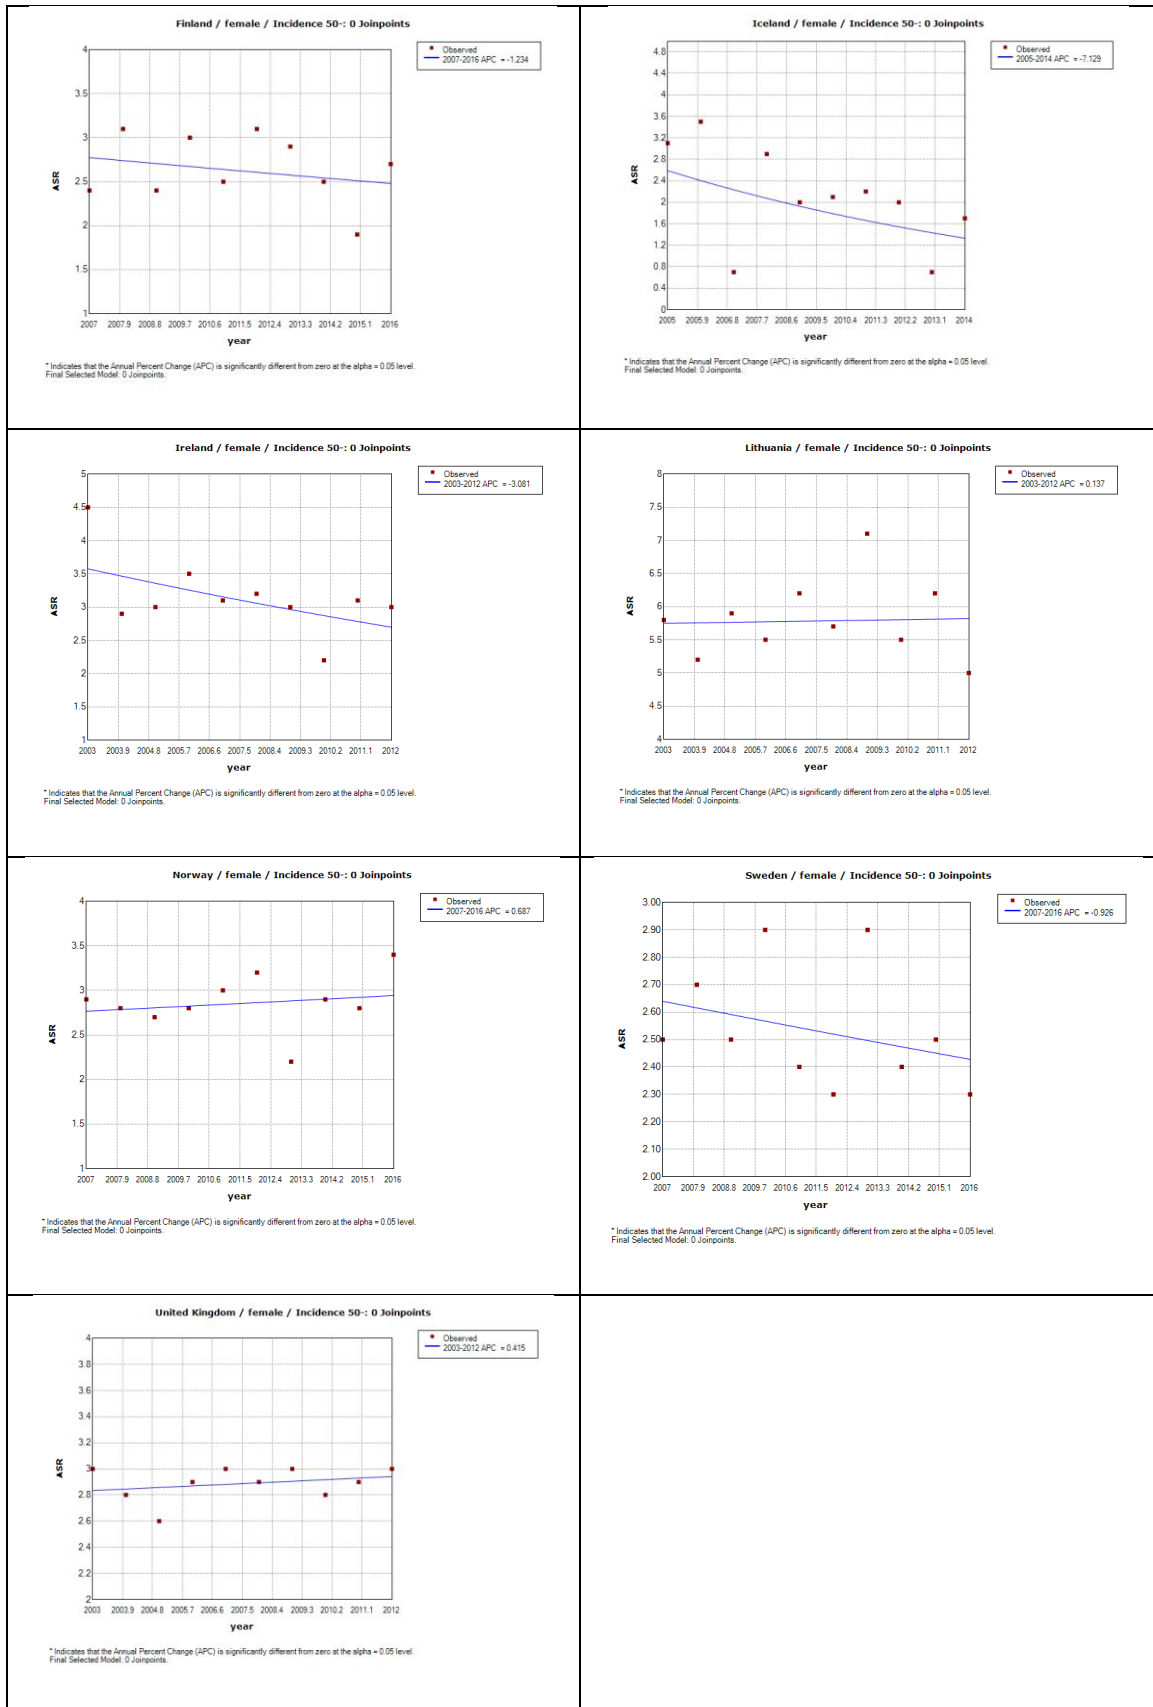

## Western Europe

Austria / female / Incidence 50+: 0 Joinpoints

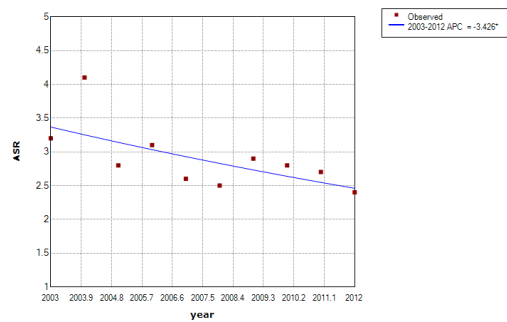

\* Indicates that the Annual Percent Change (APC) is significantly different from zero at the alpha = 0.05 level.  
Final Selected Model: 0 Joinpoints.

France / female / Incidence 50+: 0 Joinpoints

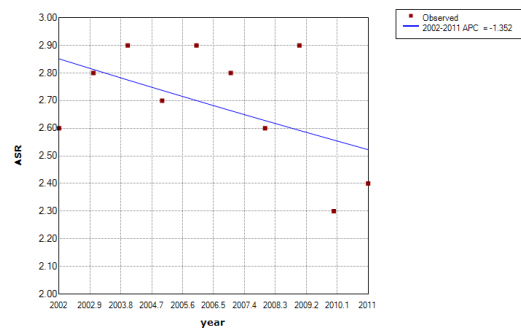

\* Indicates that the Annual Percent Change (APC) is significantly different from zero at the alpha = 0.05 level.  
Final Selected Model: 0 Joinpoints.

Germany / female / Incidence 50+: 0 Joinpoints

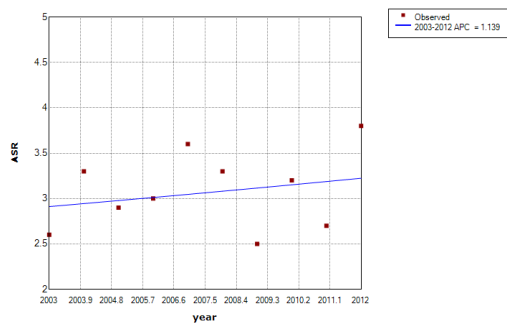

\* Indicates that the Annual Percent Change (APC) is significantly different from zero at the alpha = 0.05 level.  
Final Selected Model: 0 Joinpoints.

Netherlands / female / Incidence 50+: 0 Joinpoints

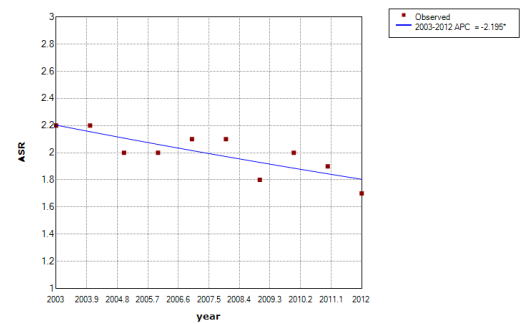

\* Indicates that the Annual Percent Change (APC) is significantly different from zero at the alpha = 0.05 level.  
Final Selected Model: 0 Joinpoints.

Switzerland / female / Incidence 50+: 0 Joinpoints

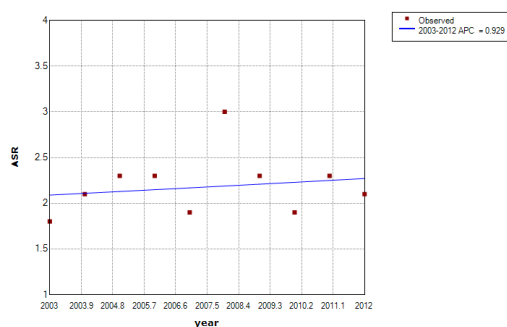

\* Indicates that the Annual Percent Change (APC) is significantly different from zero at the alpha = 0.05 level.  
Final Selected Model: 0 Joinpoints.

## Southern Europe

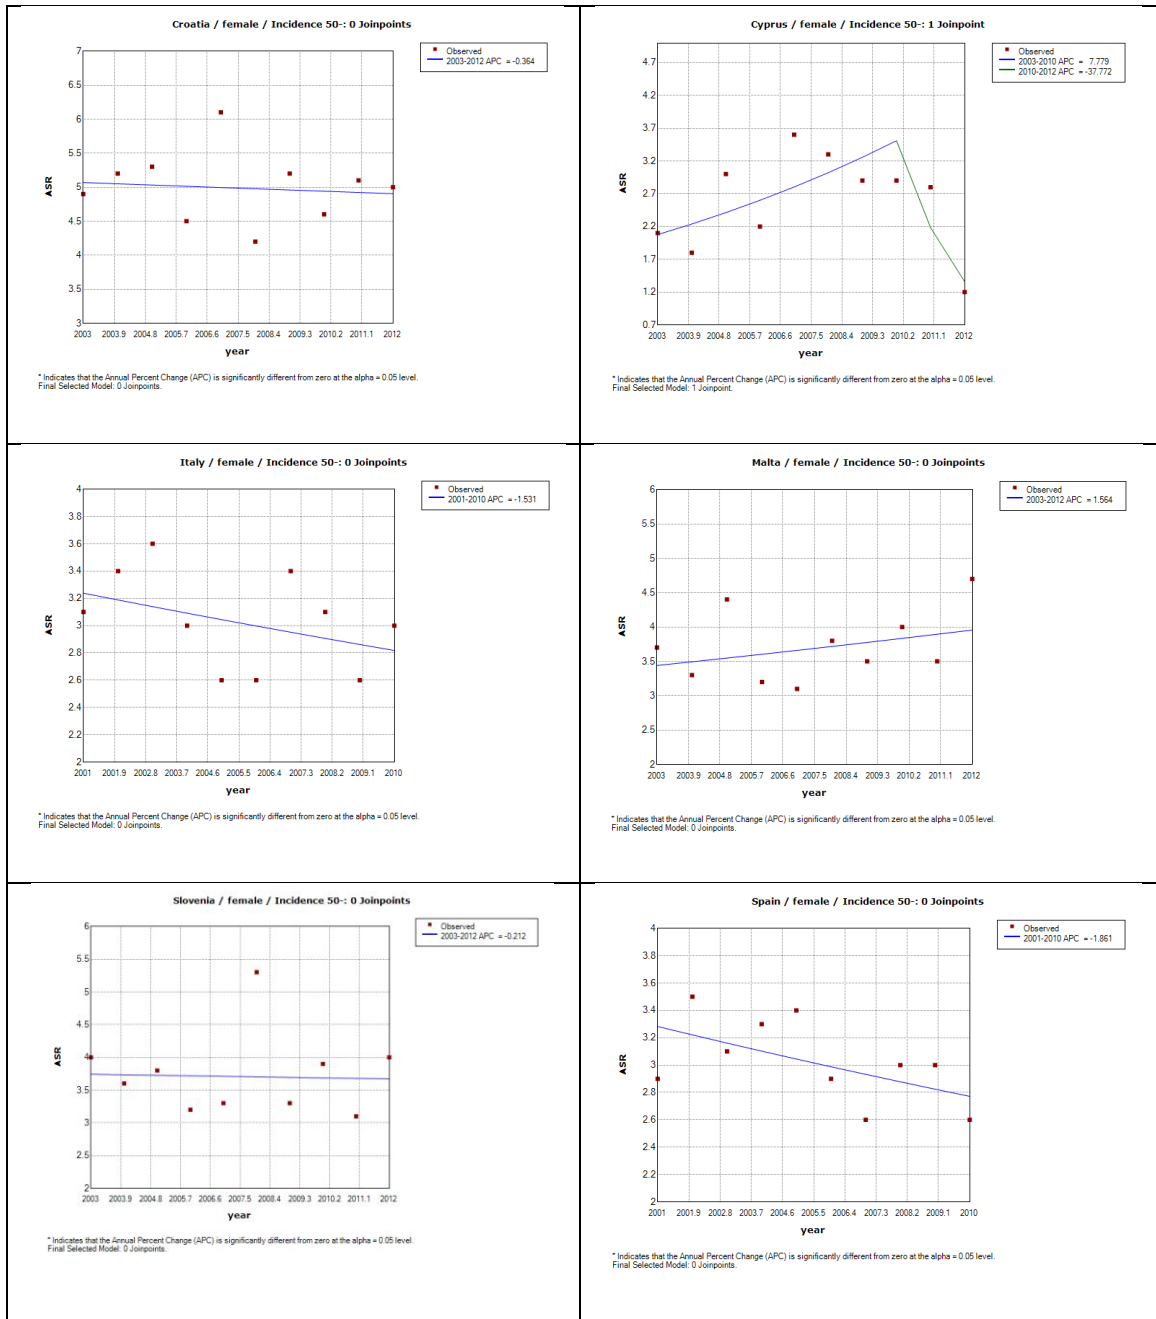

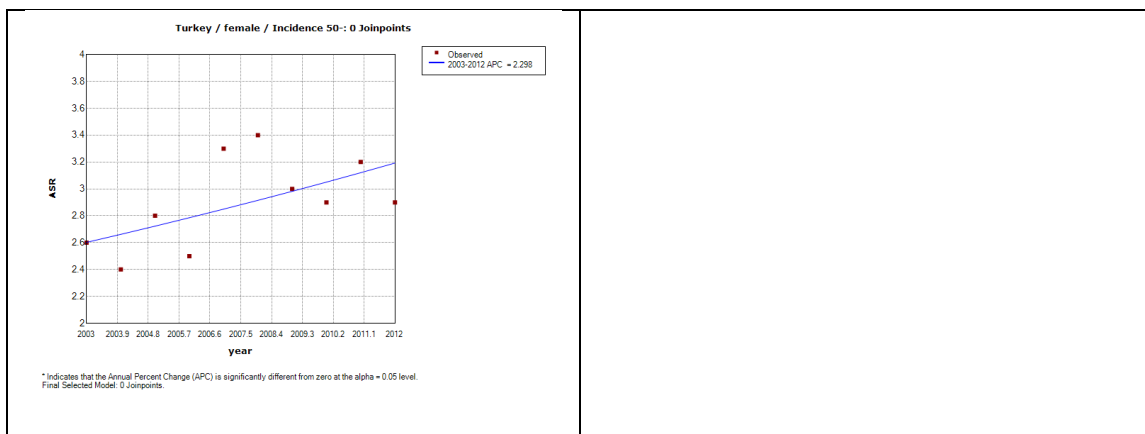

## Eastern Europe

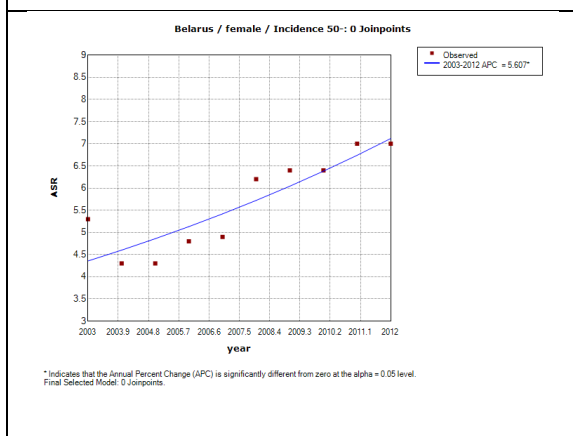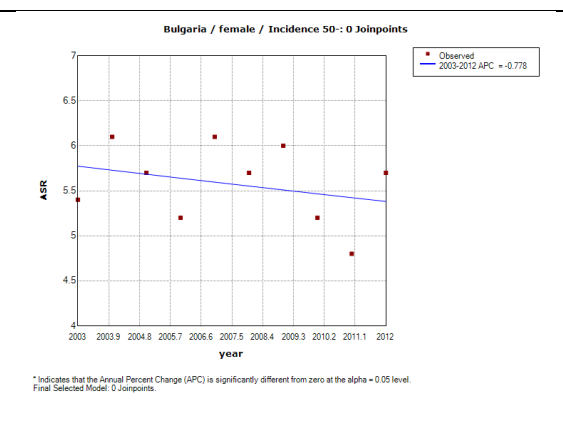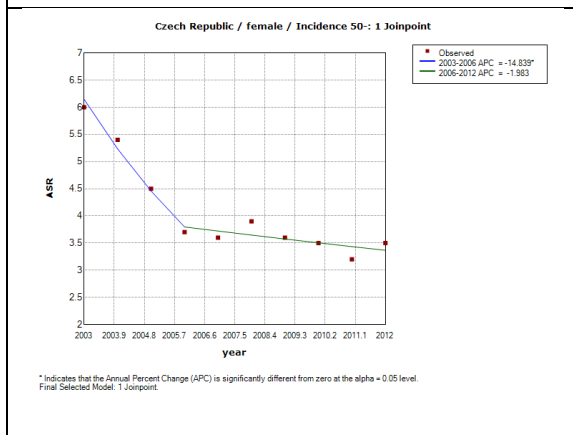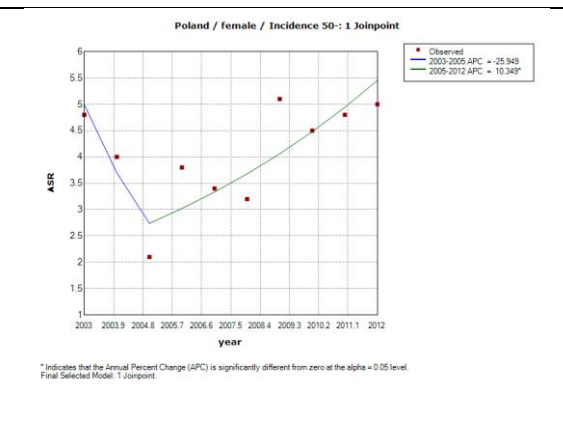

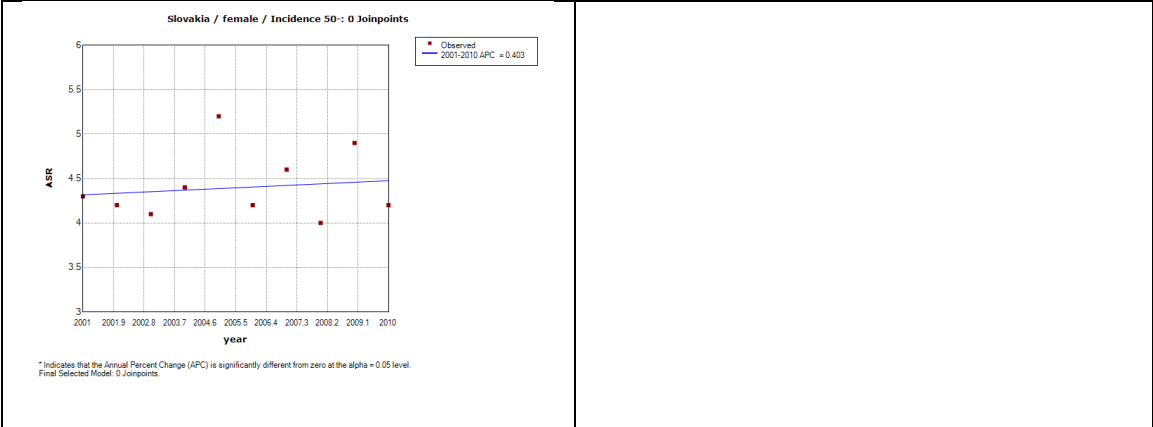

## Africa

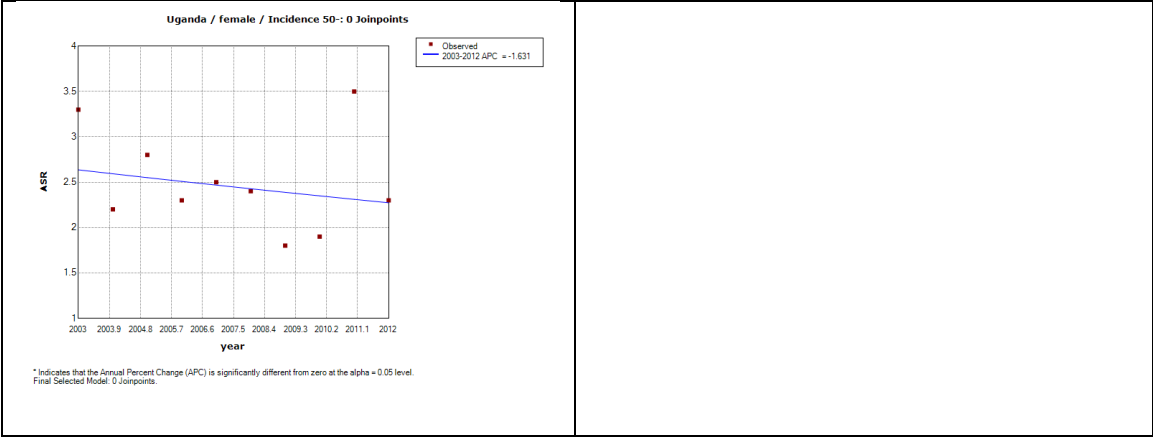



d.) Incidence female above 50 years old

## Asia

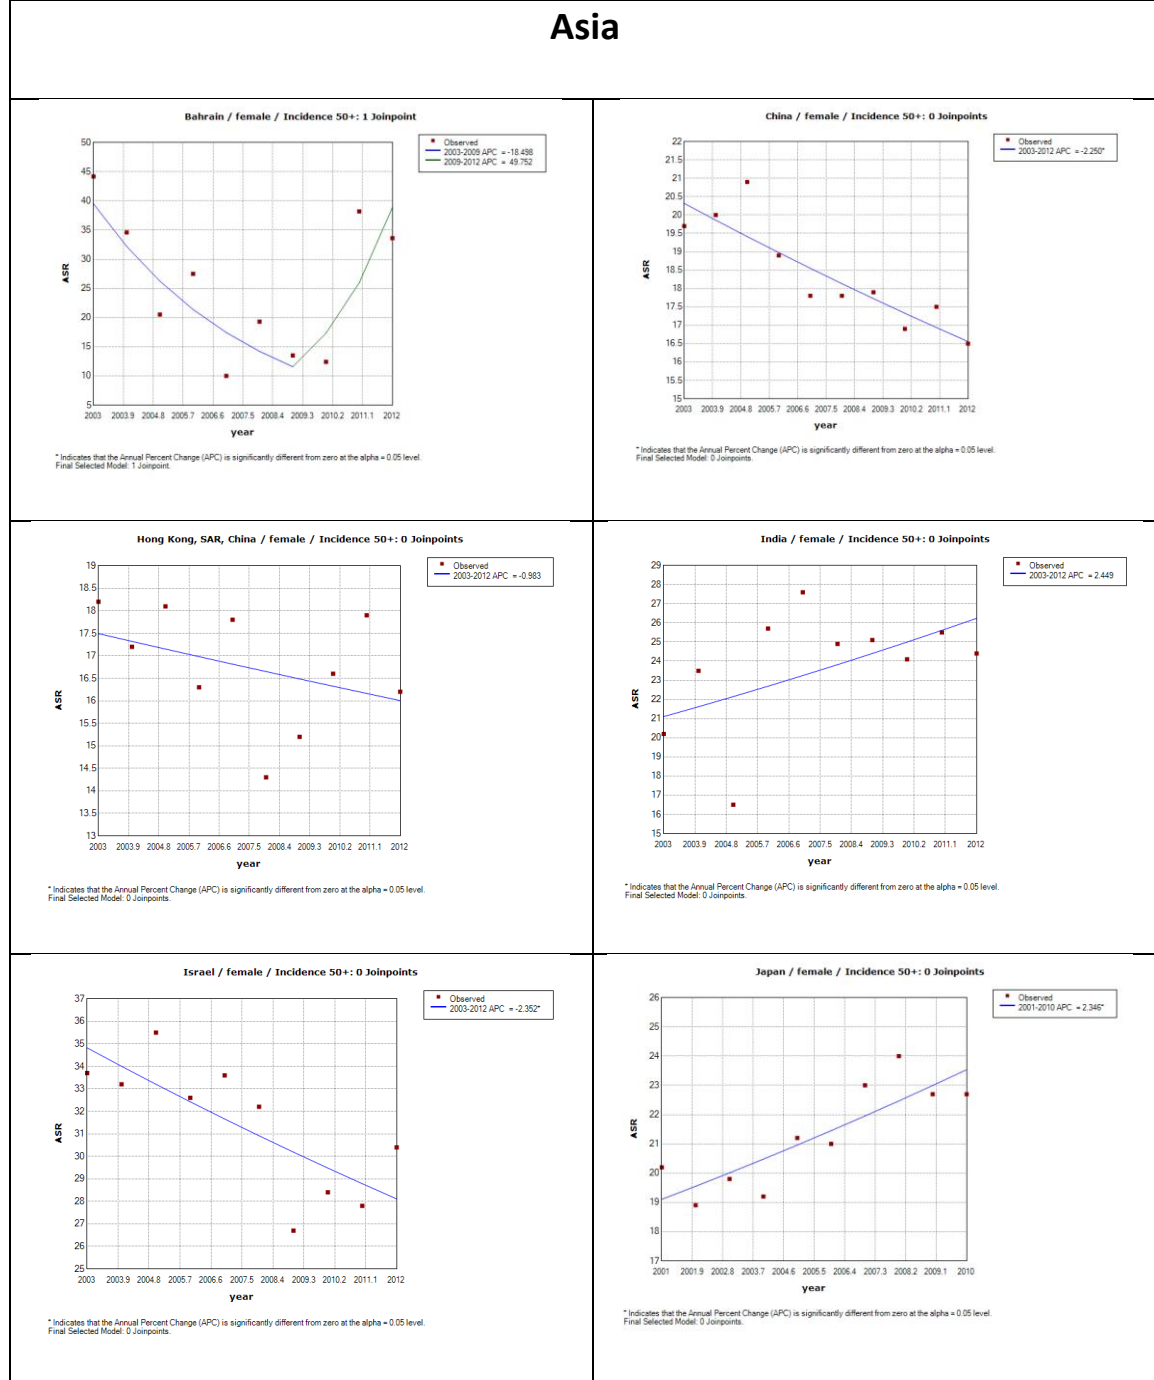

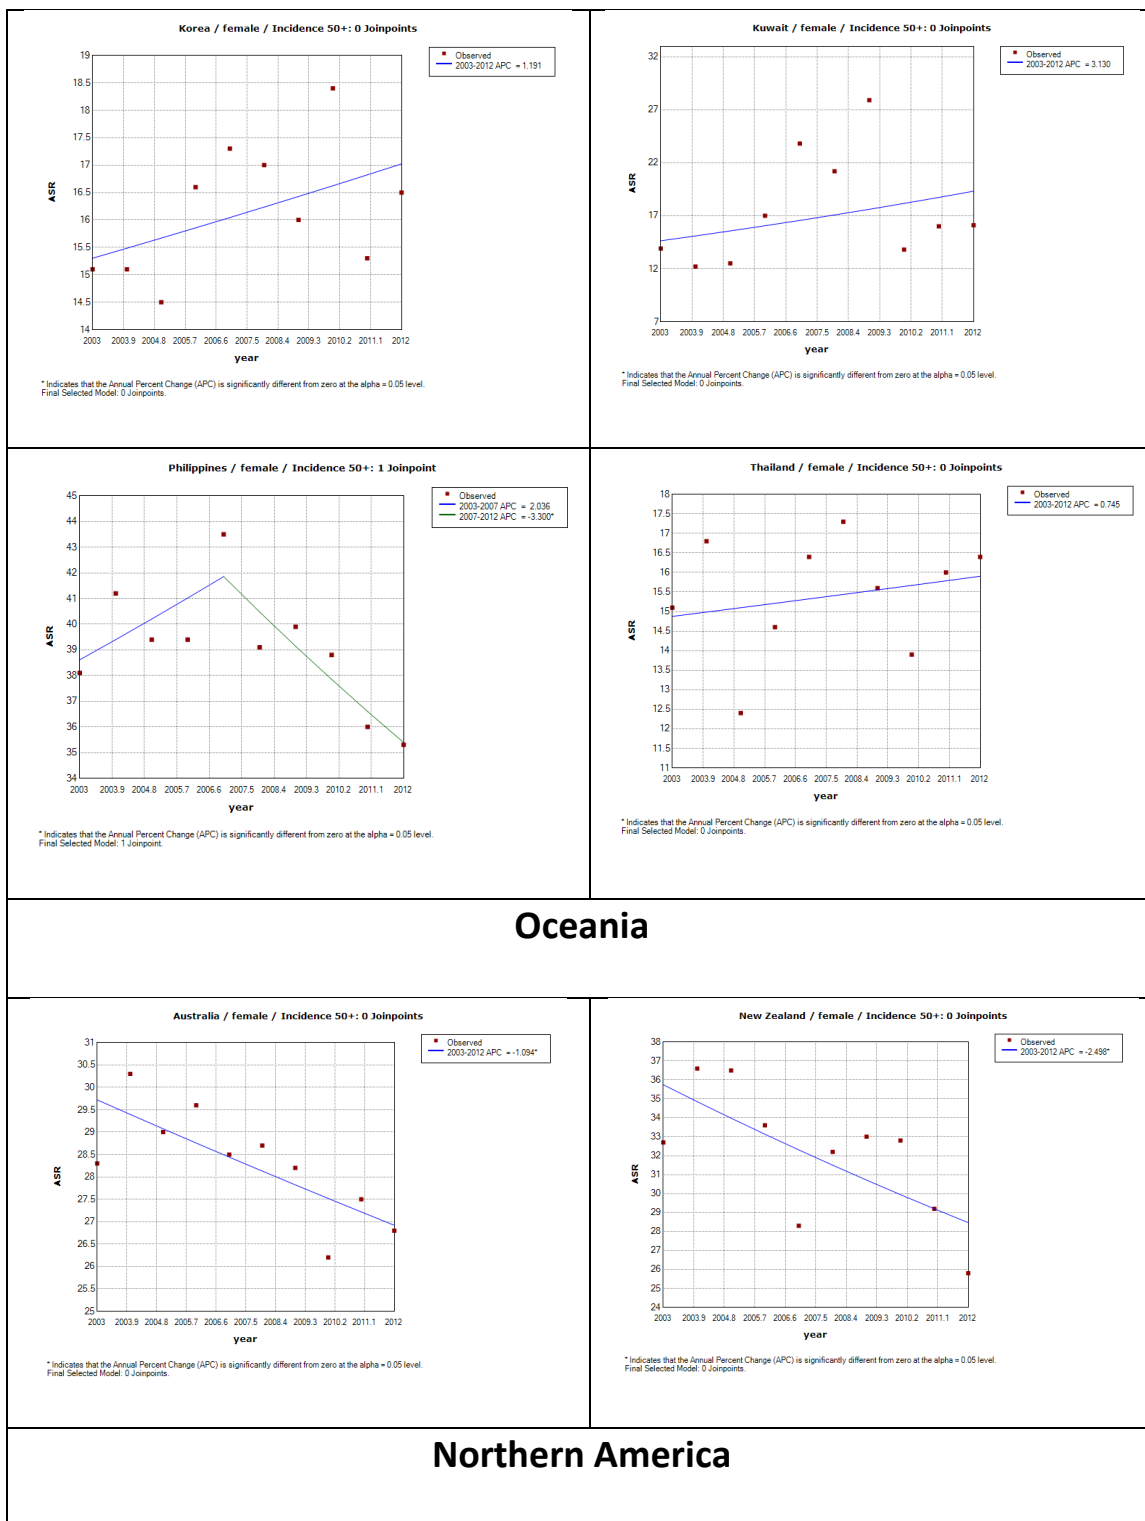

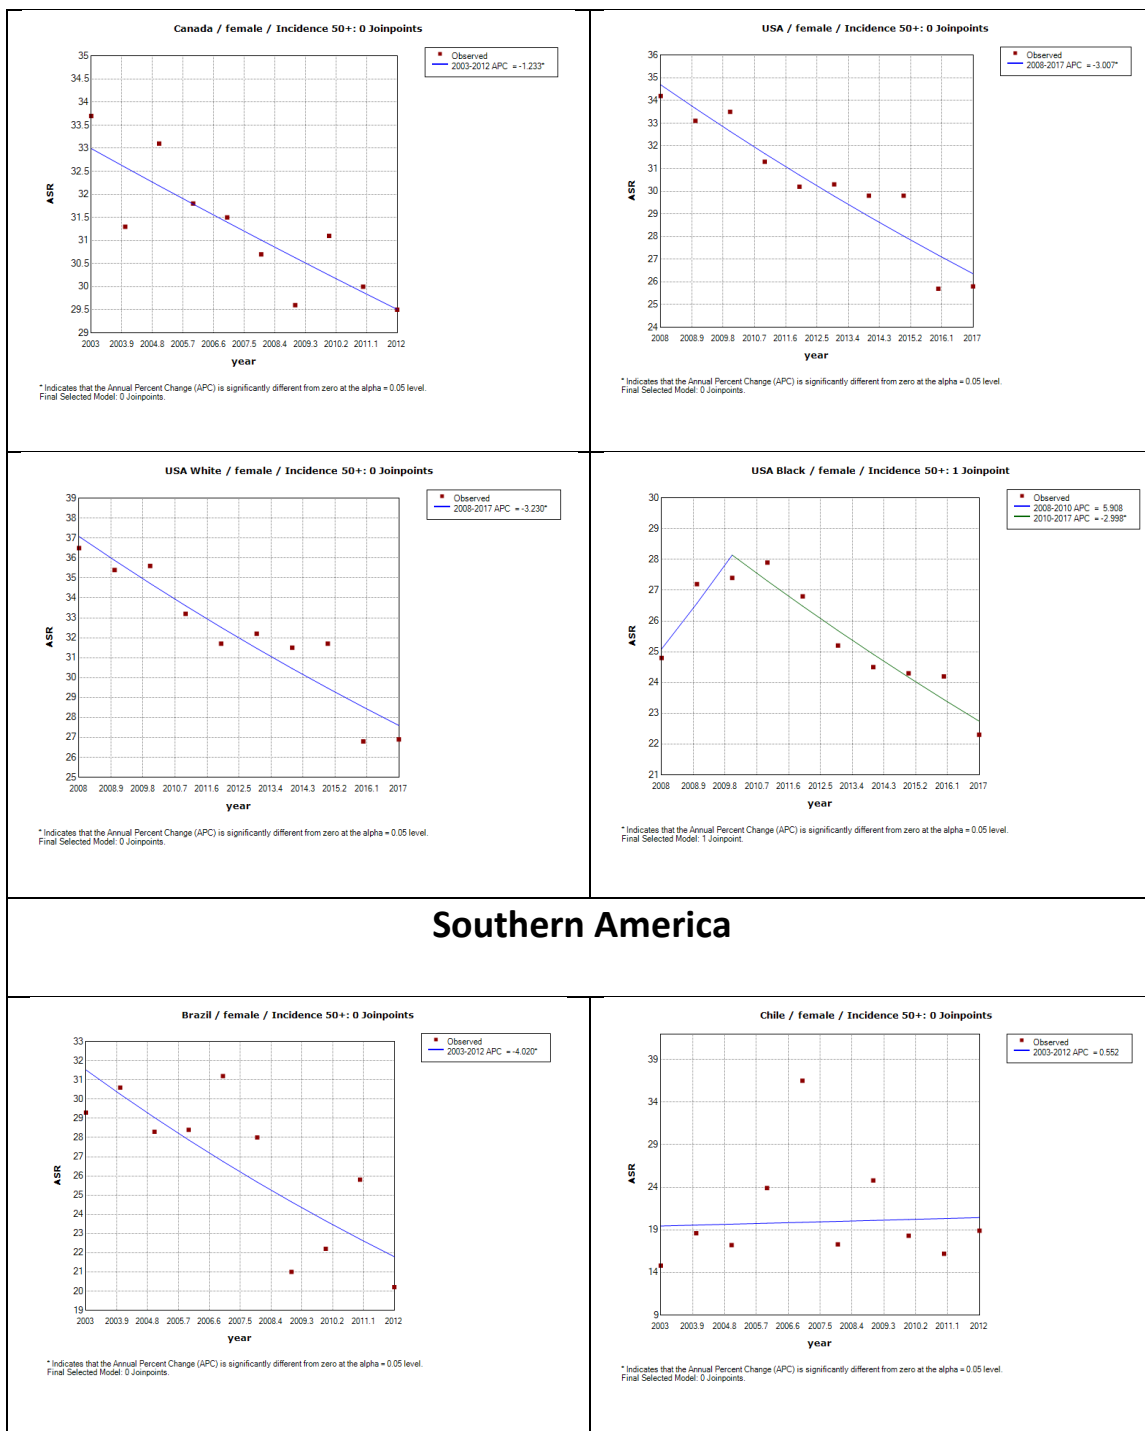

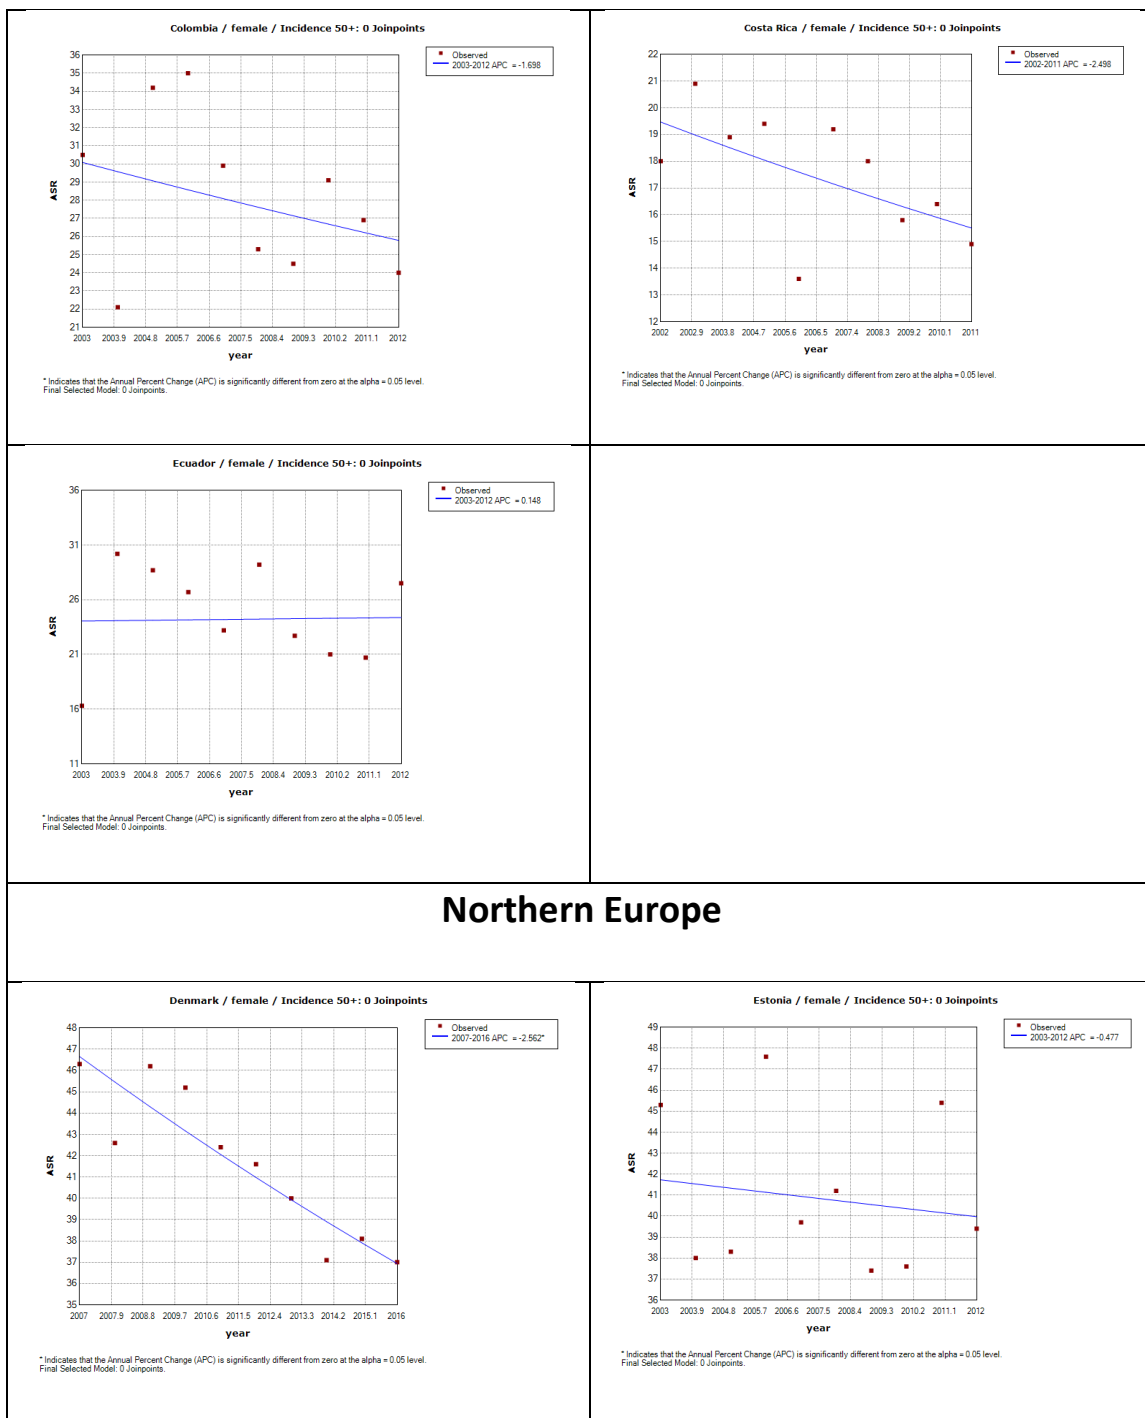

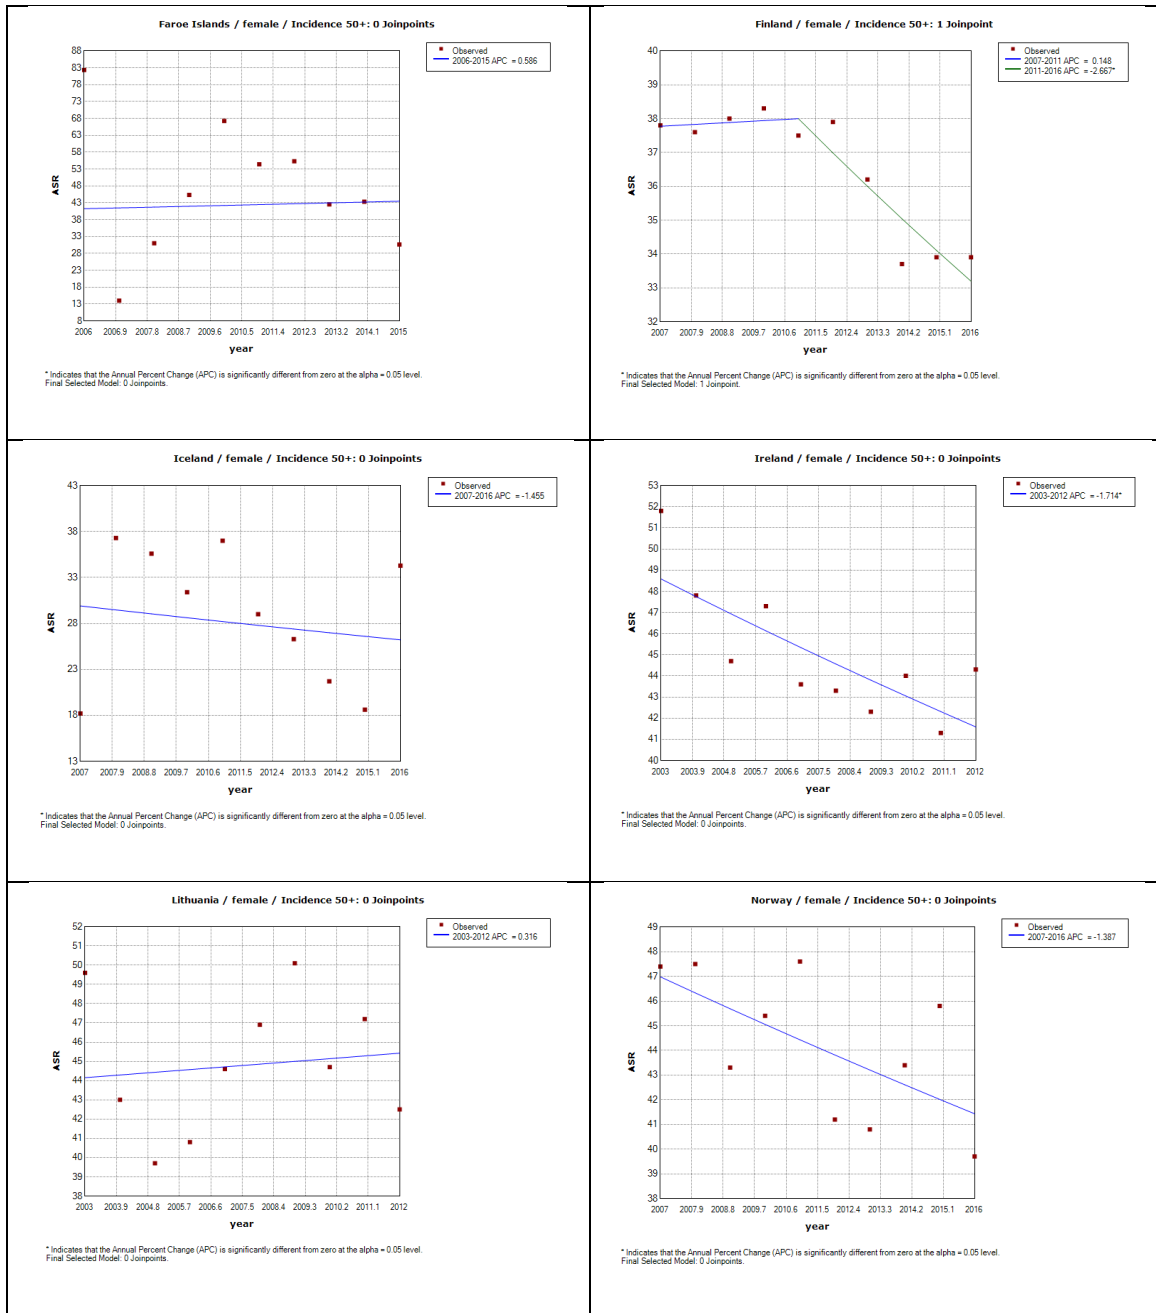

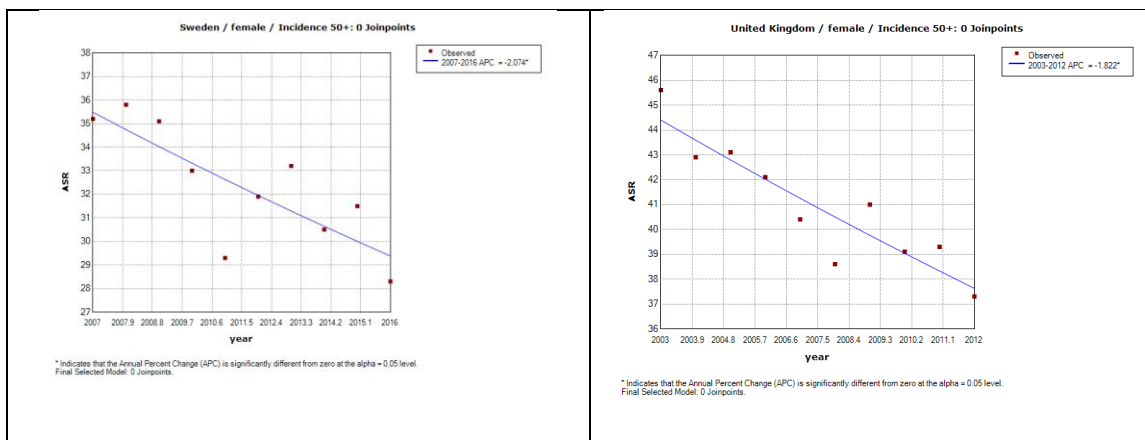

## Western Europe

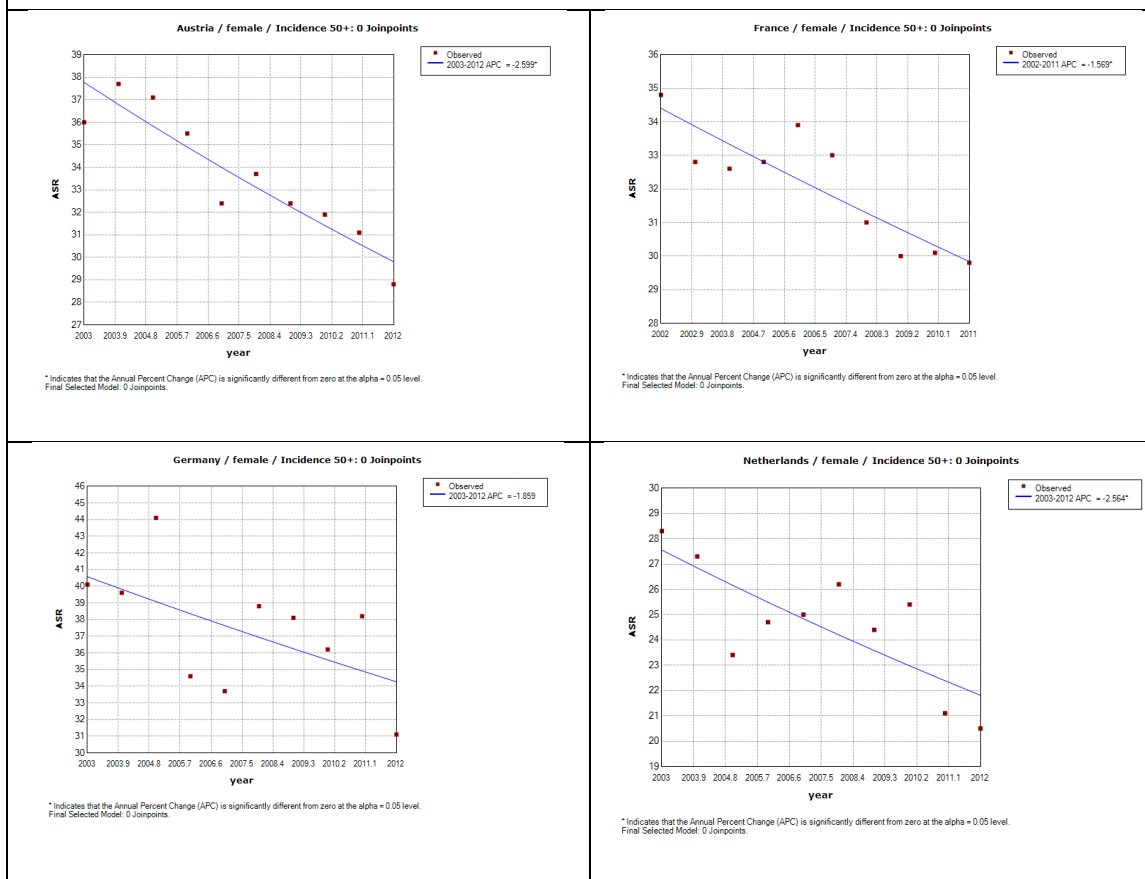

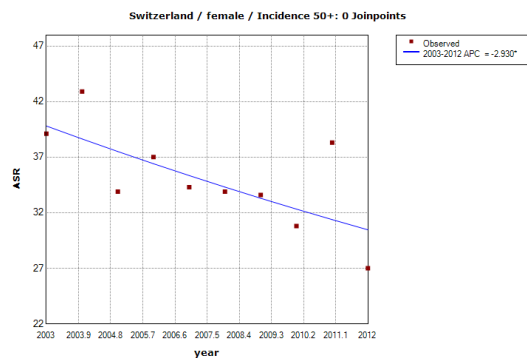

\* Indicates that the Annual Percent Change (APC) is significantly different from zero at the alpha = 0.05 level.  
Final Selected Model: 0 Joinpoints

## Southern Europe

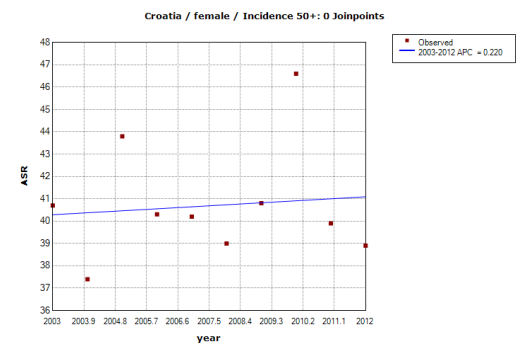

\* Indicates that the Annual Percent Change (APC) is significantly different from zero at the alpha = 0.05 level.  
Final Selected Model: 0 Joinpoints

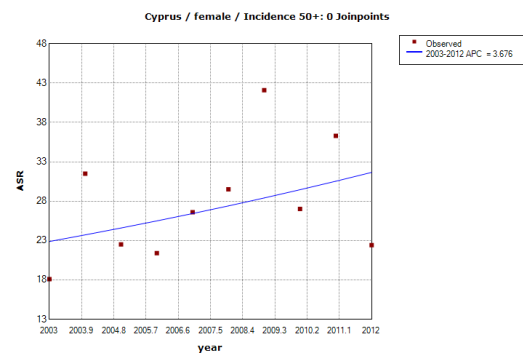

\* Indicates that the Annual Percent Change (APC) is significantly different from zero at the alpha = 0.05 level.  
Final Selected Model: 0 Joinpoints

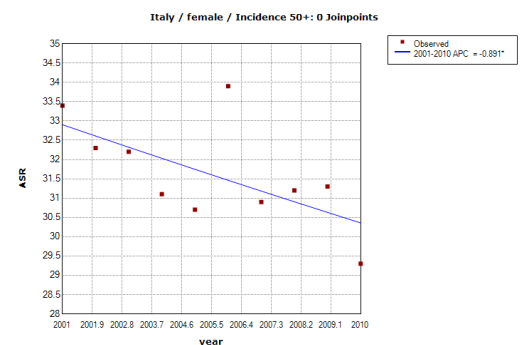

\* Indicates that the Annual Percent Change (APC) is significantly different from zero at the alpha = 0.05 level.  
Final Selected Model: 0 Joinpoints

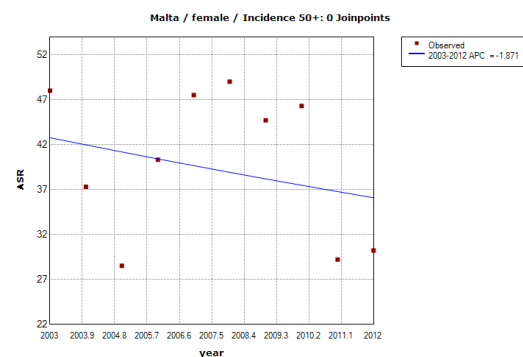

\* Indicates that the Annual Percent Change (APC) is significantly different from zero at the alpha = 0.05 level.  
Final Selected Model: 0 Joinpoints

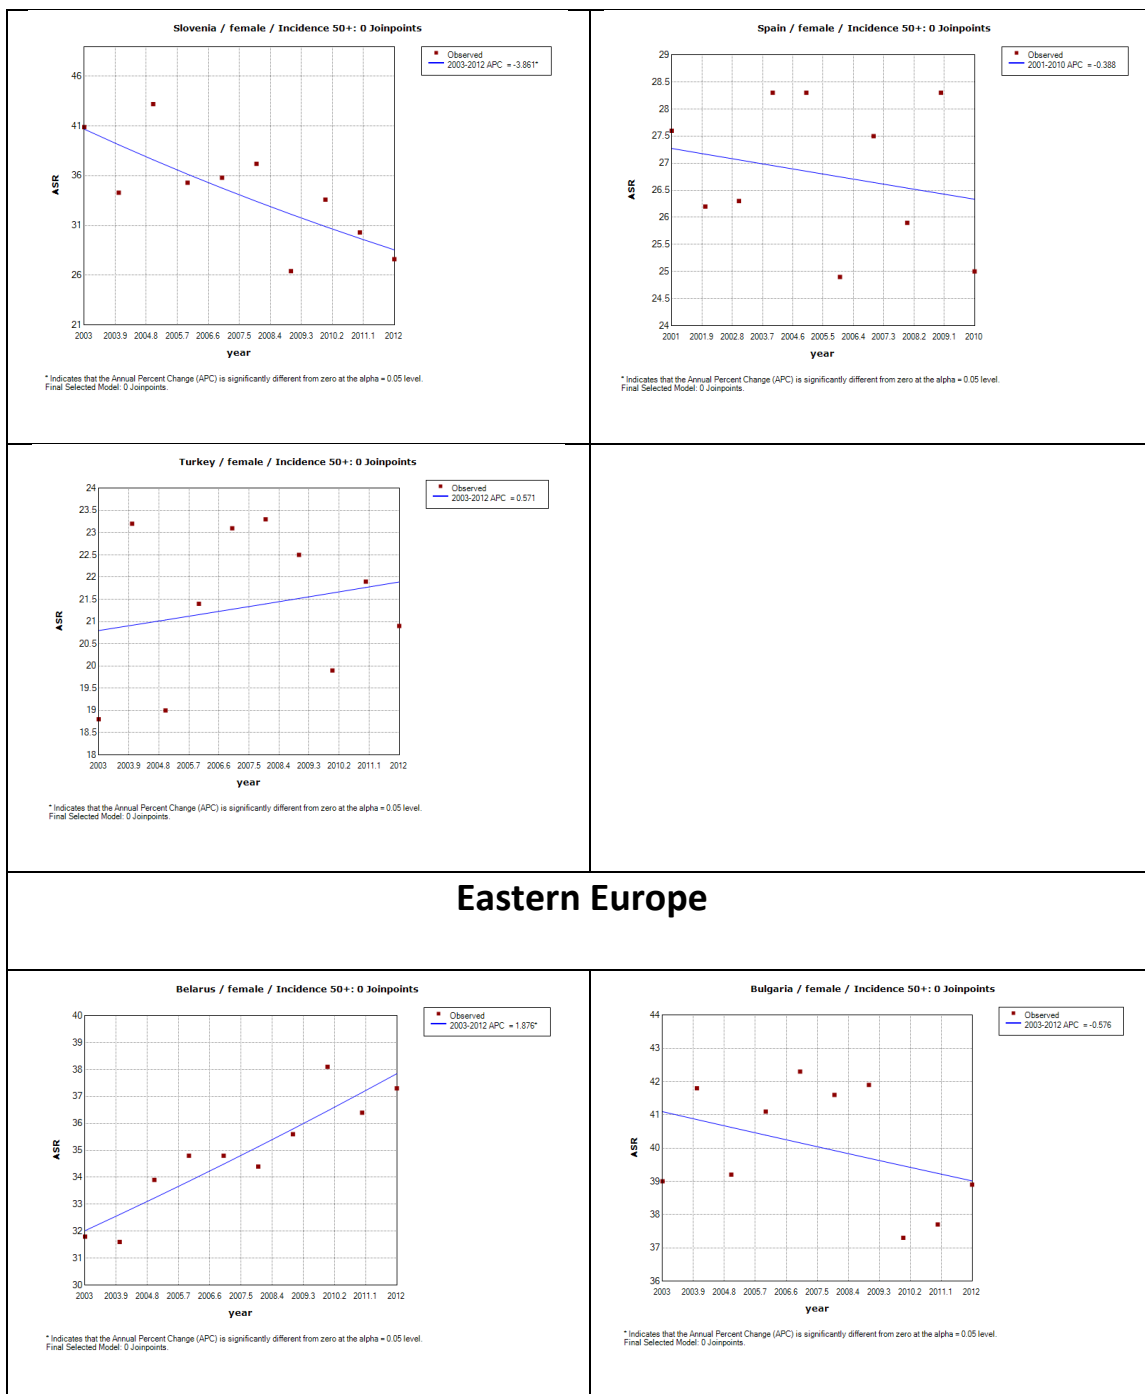



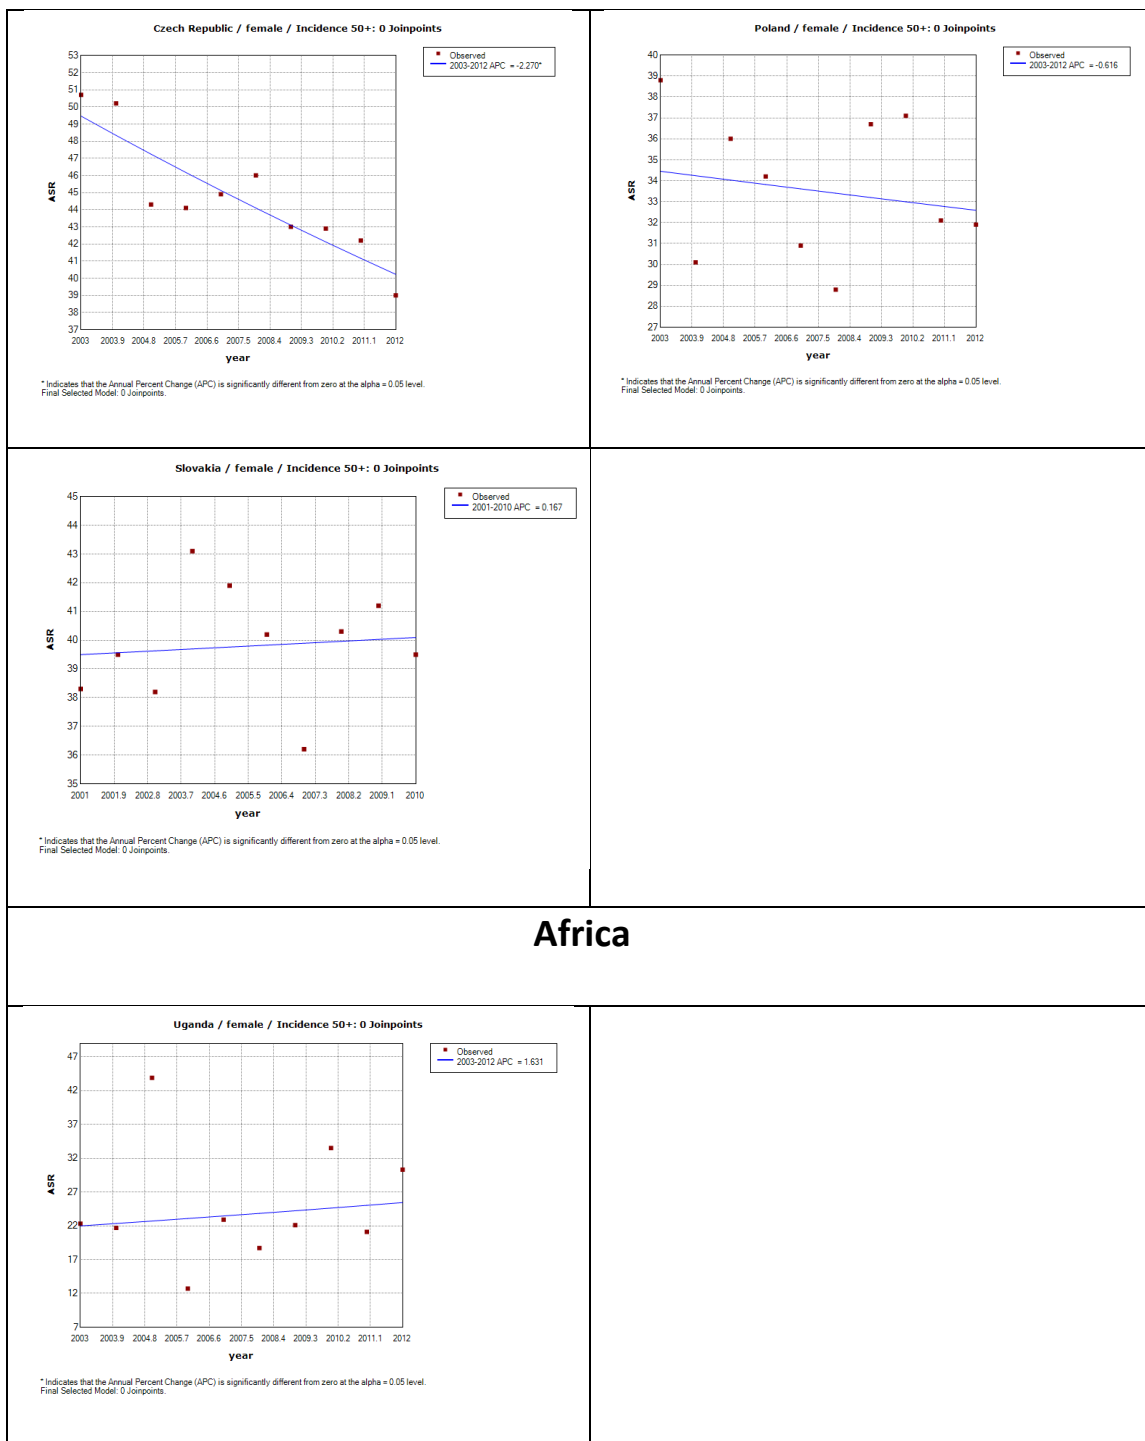

## e.) Mortality female all ages

### Asia

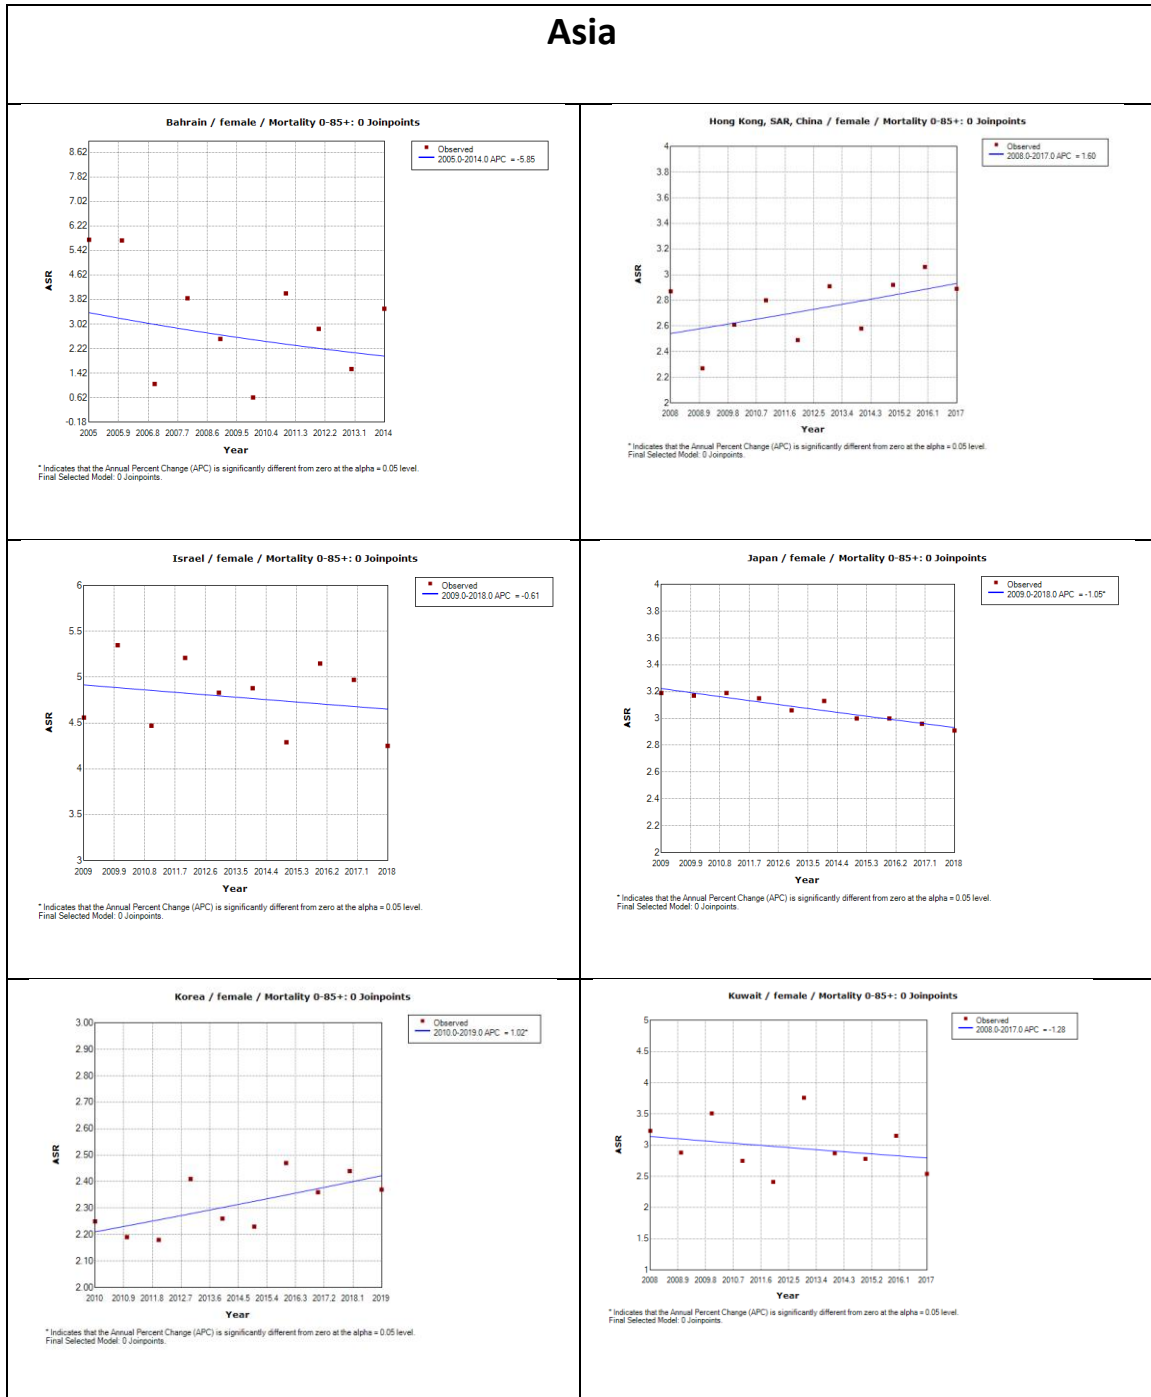

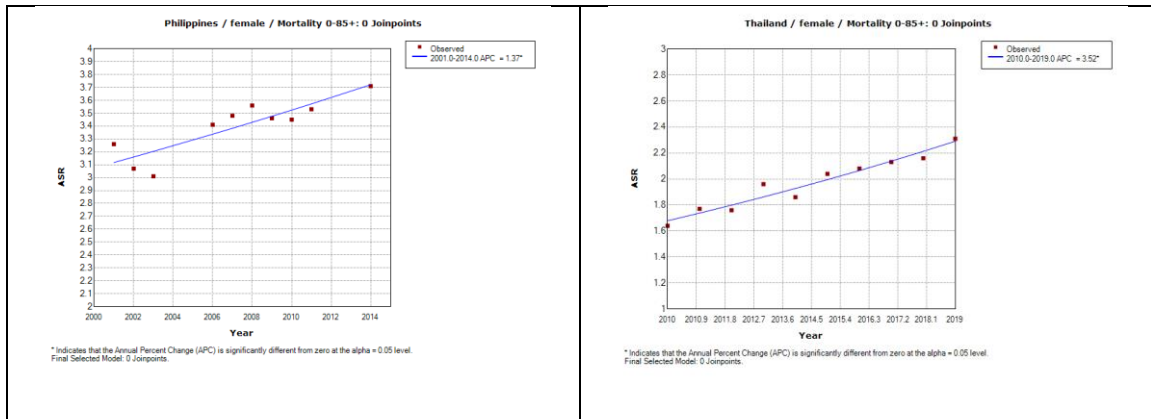

## Oceania

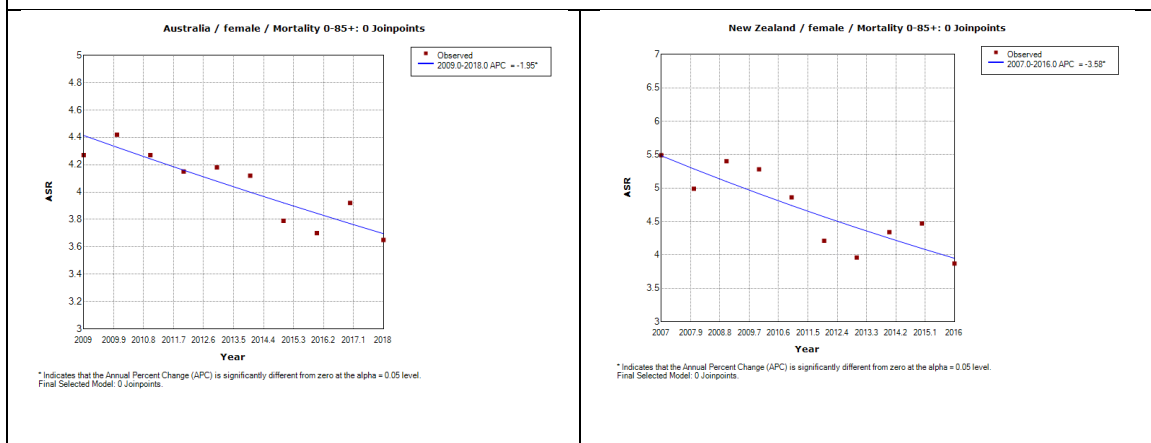

## Northern America

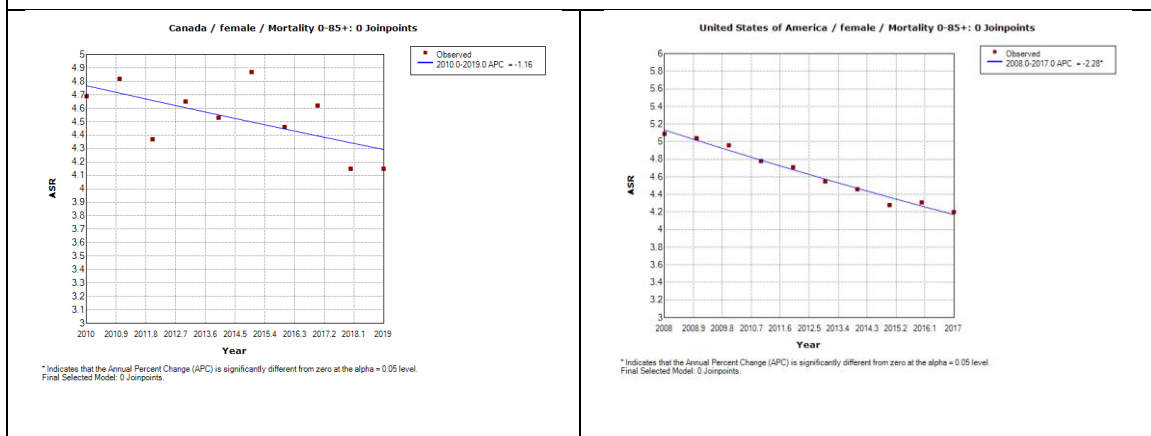

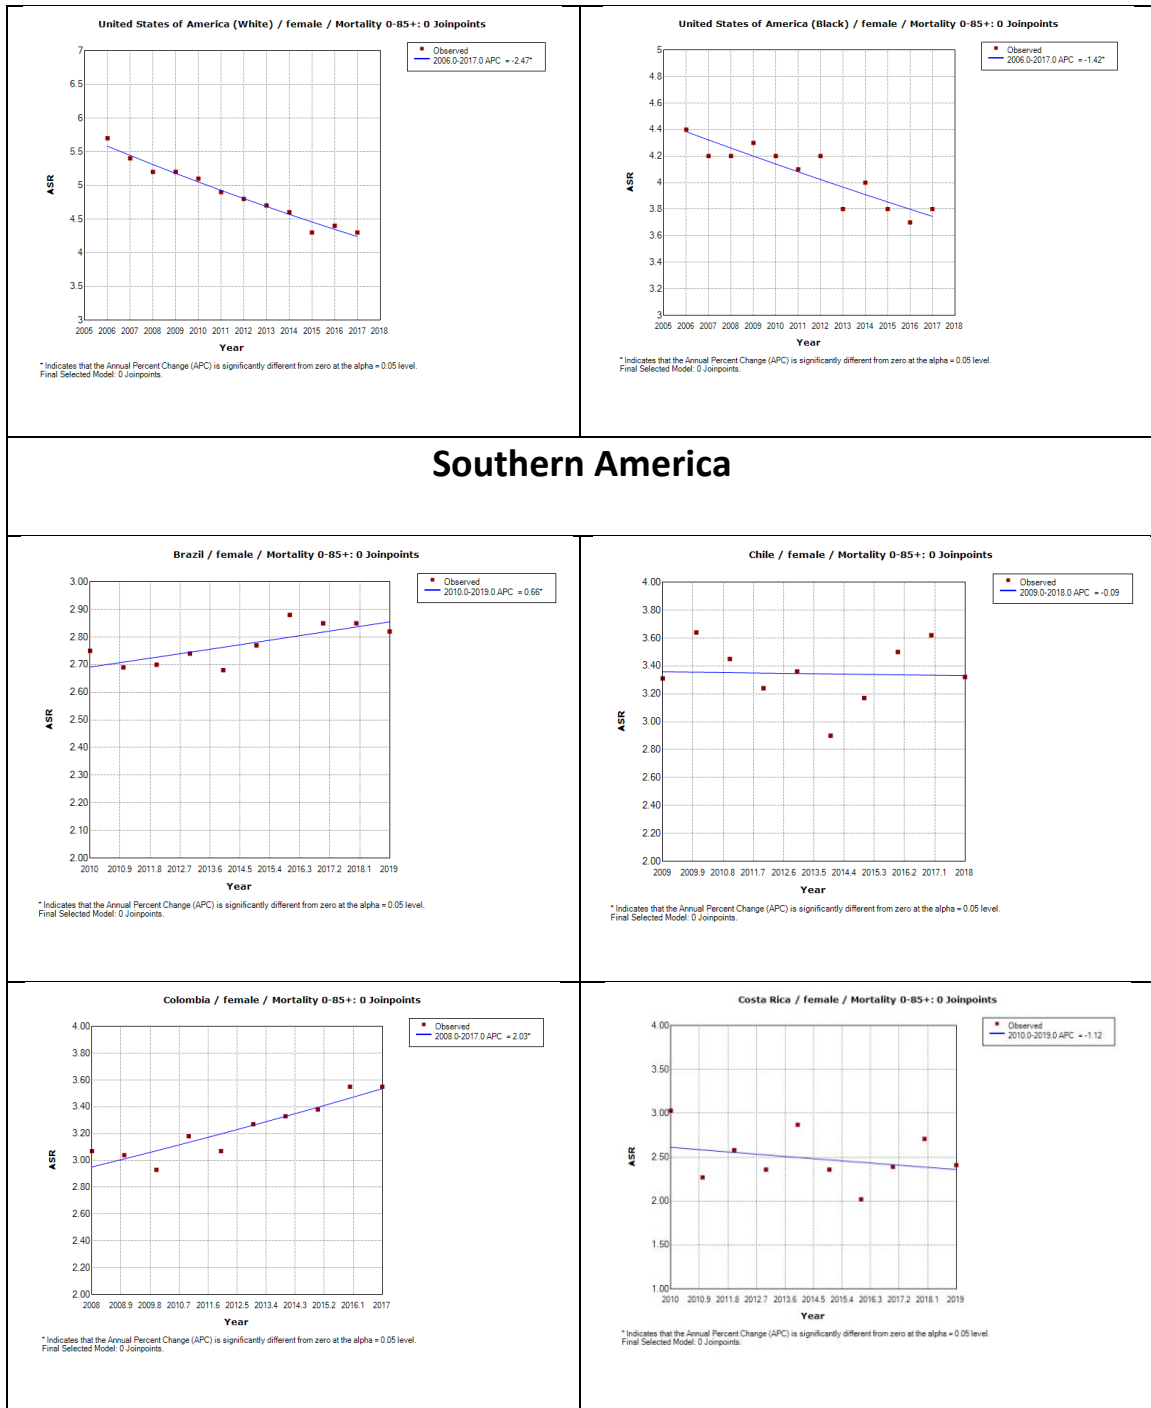

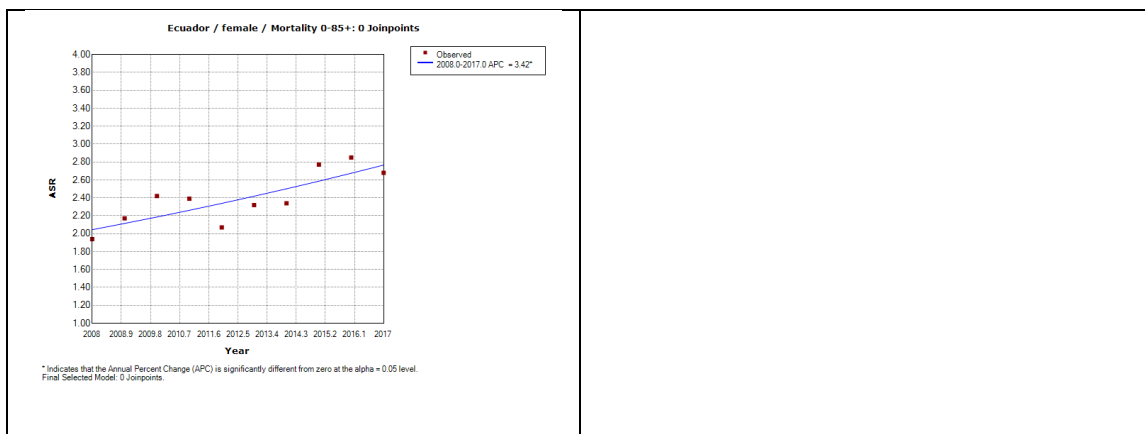

## Northern Europe

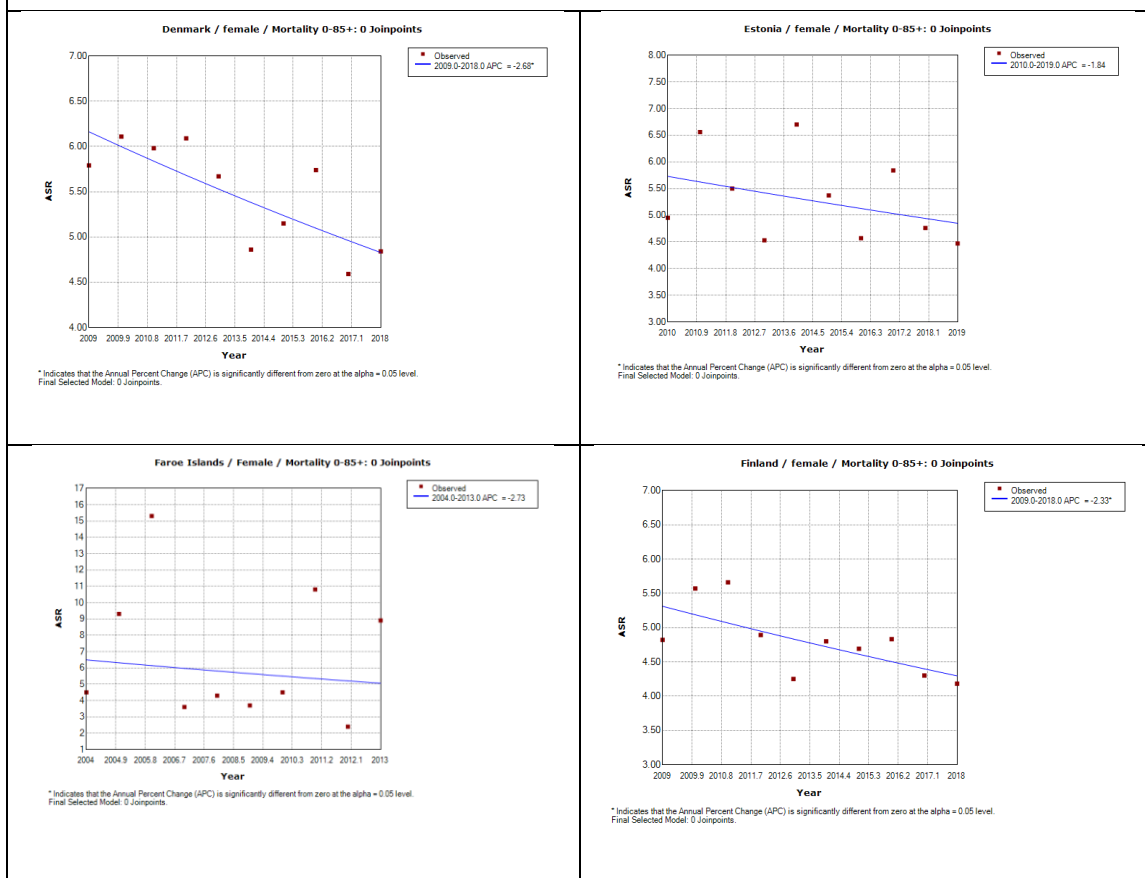

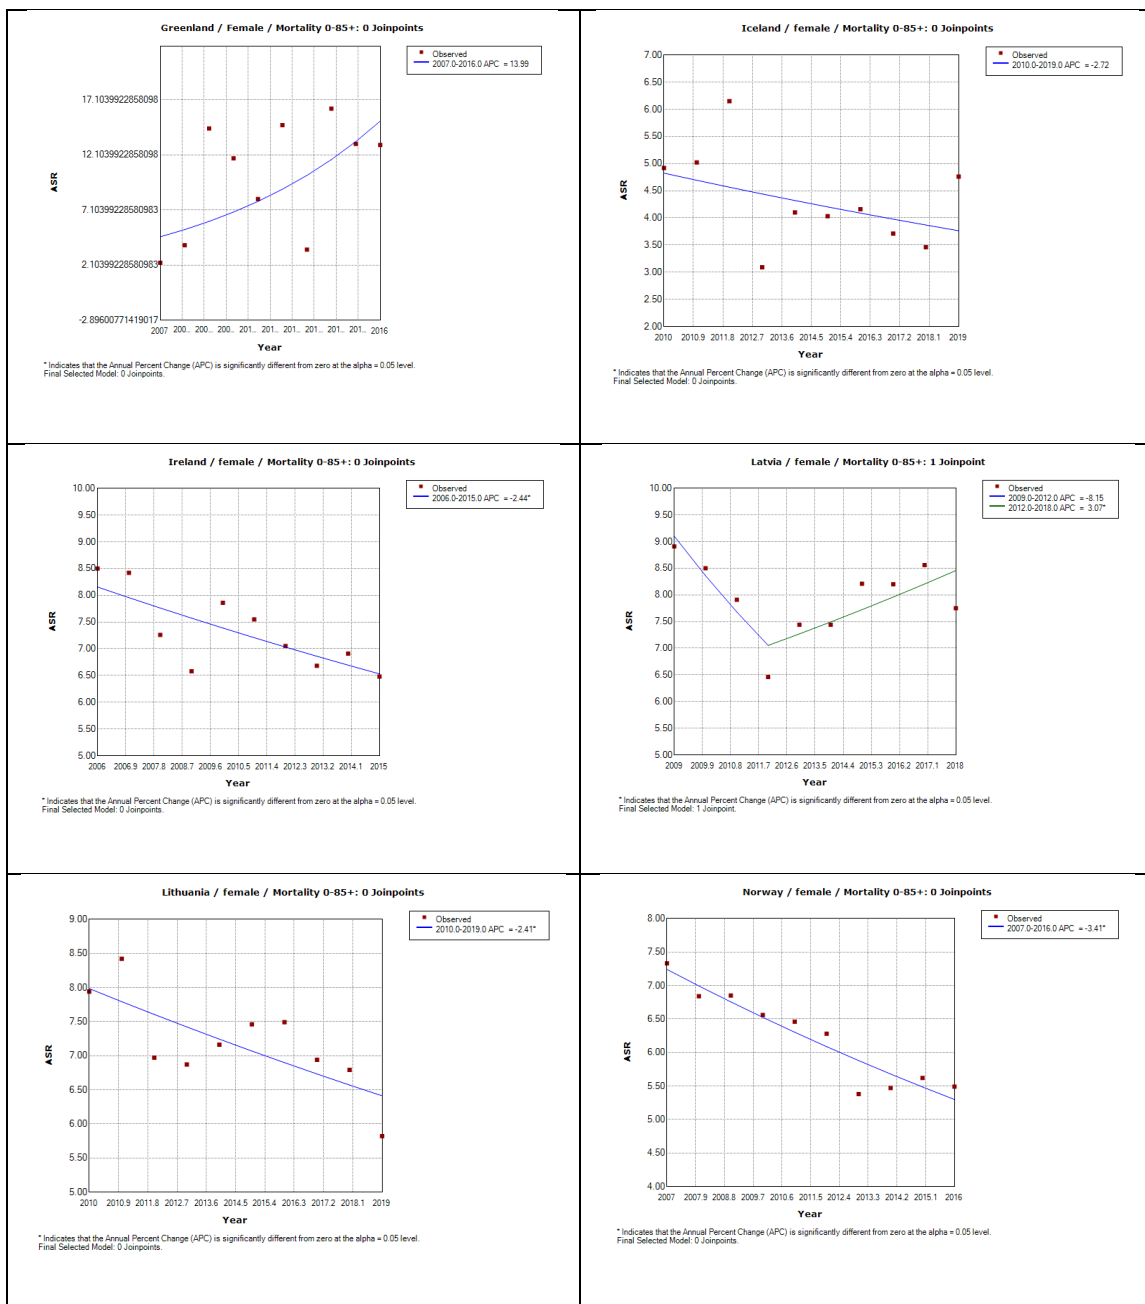

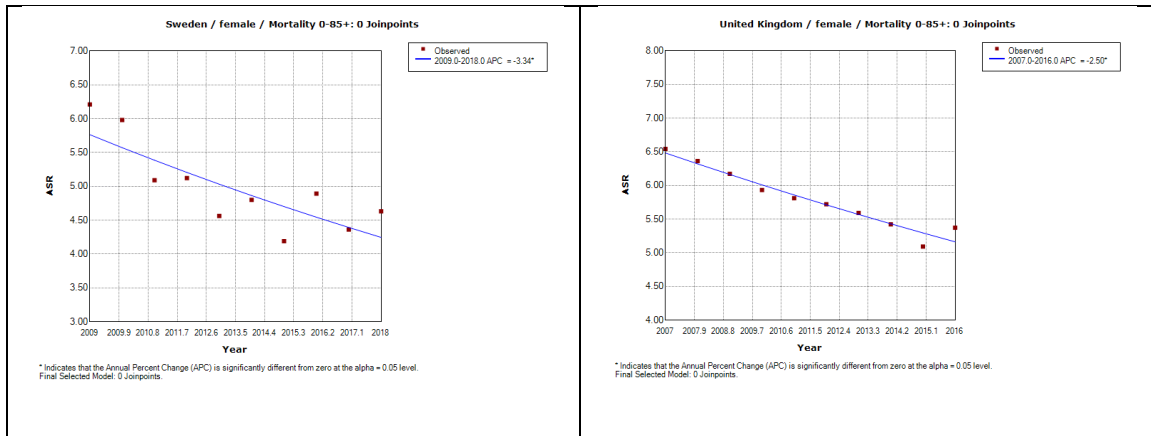

## Western Europe

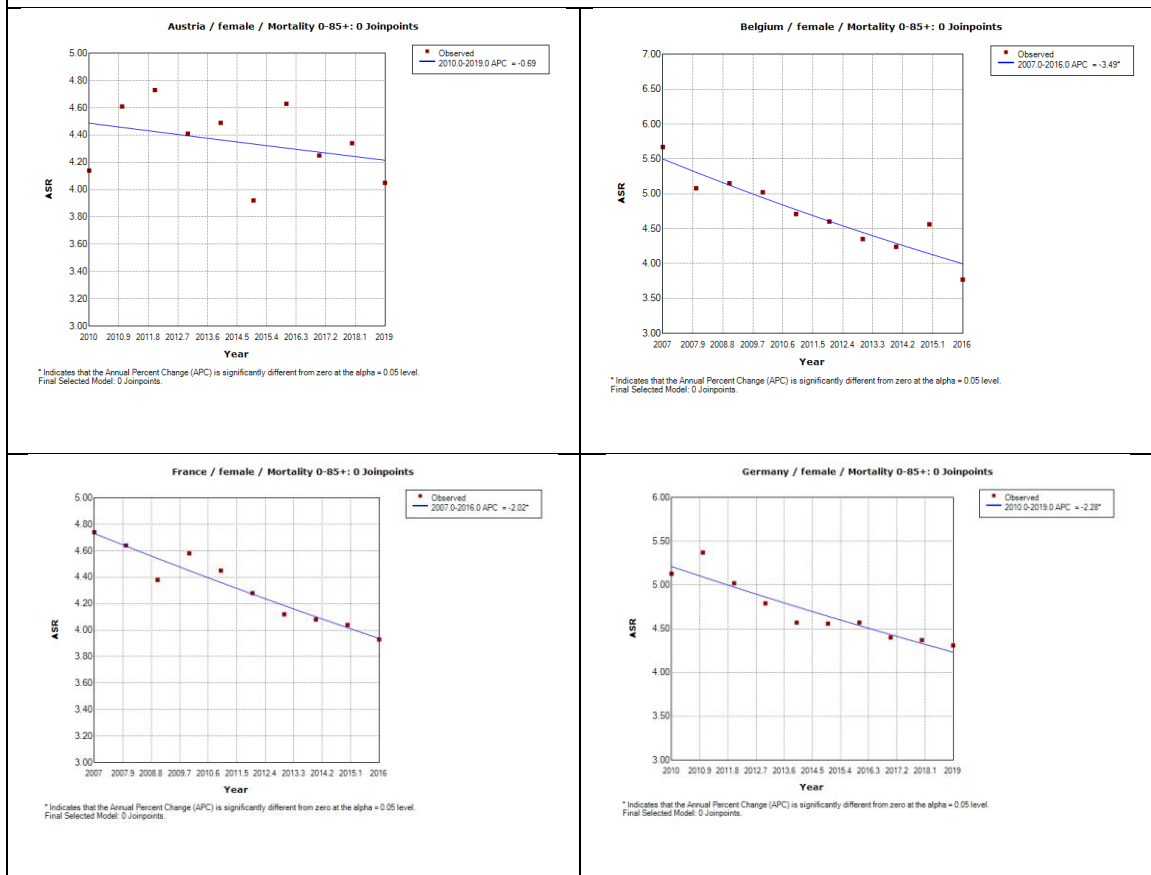

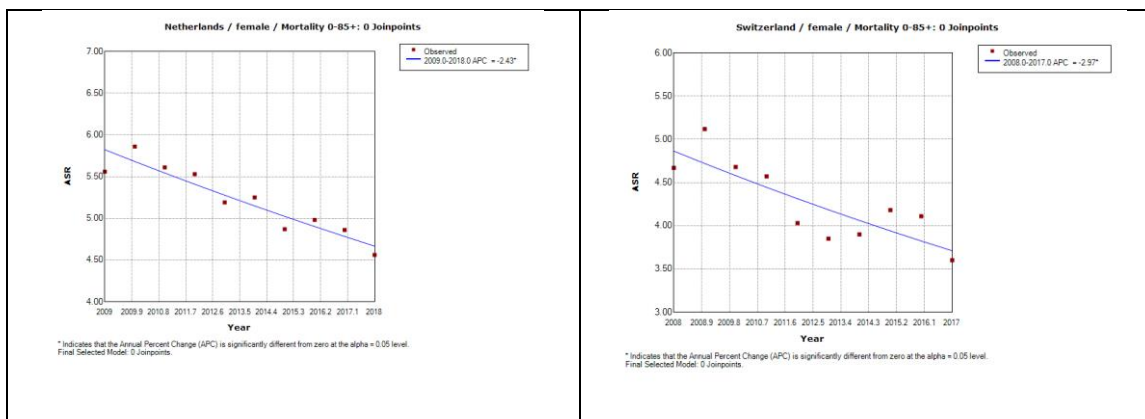

## Southern Europe

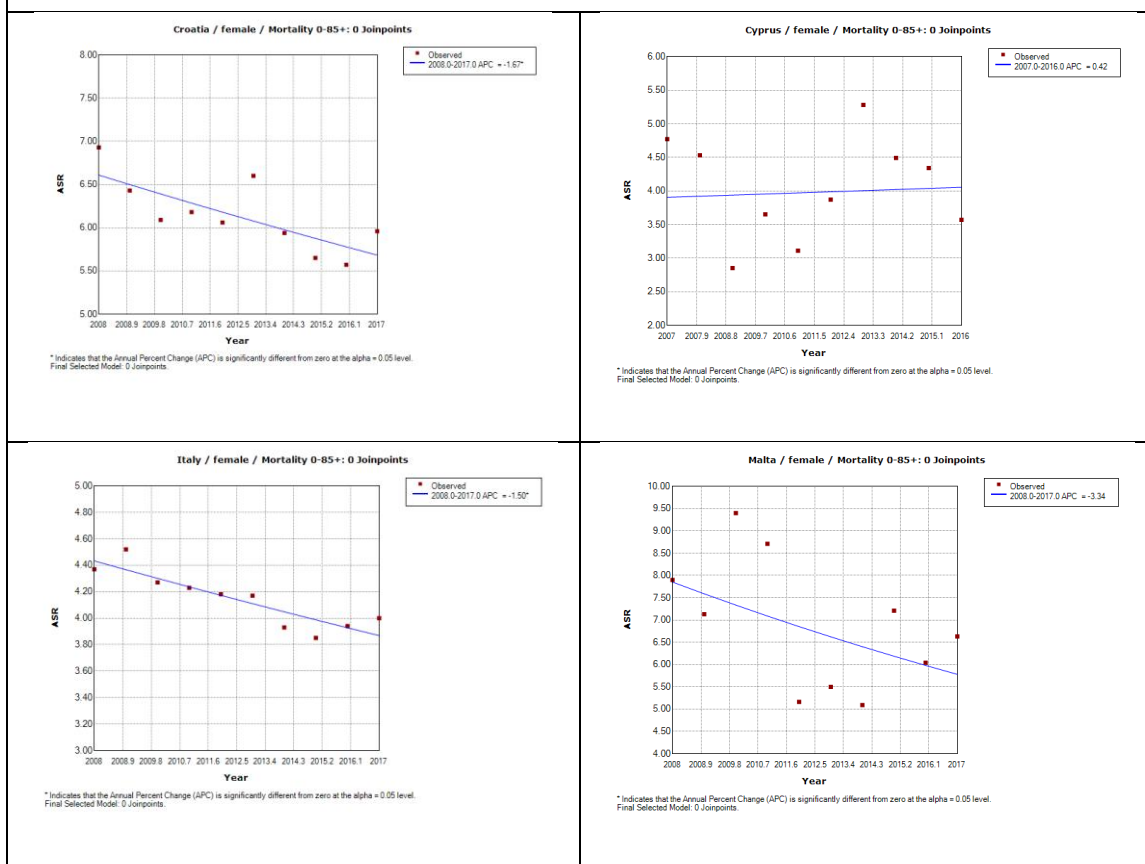



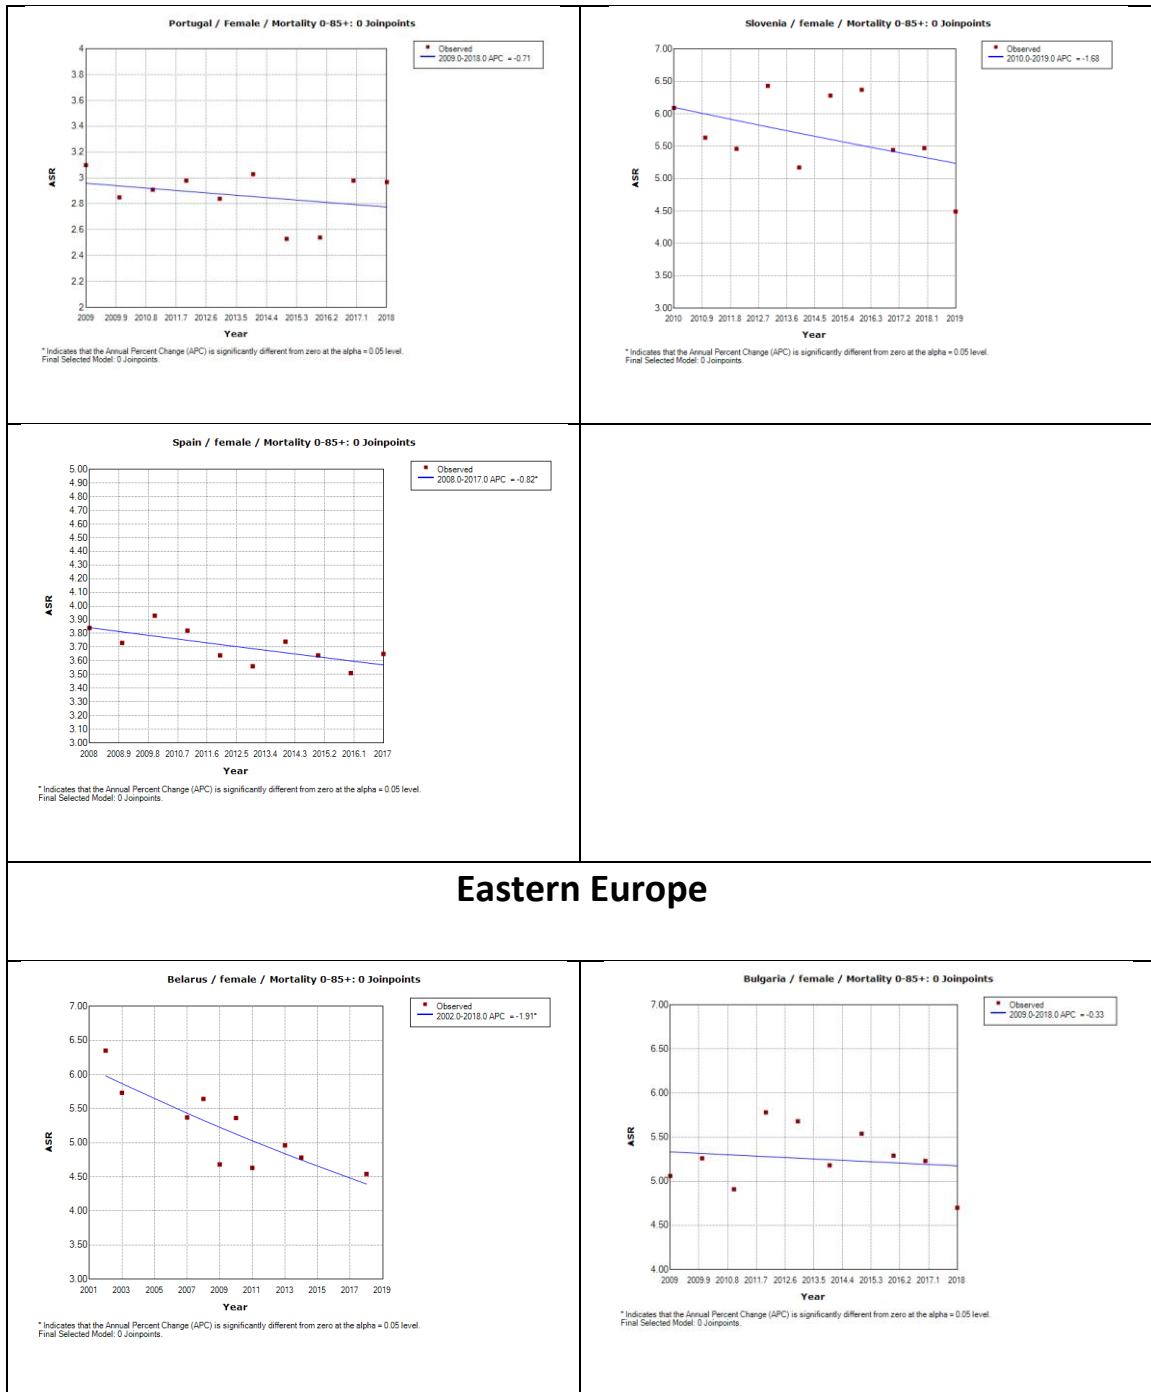

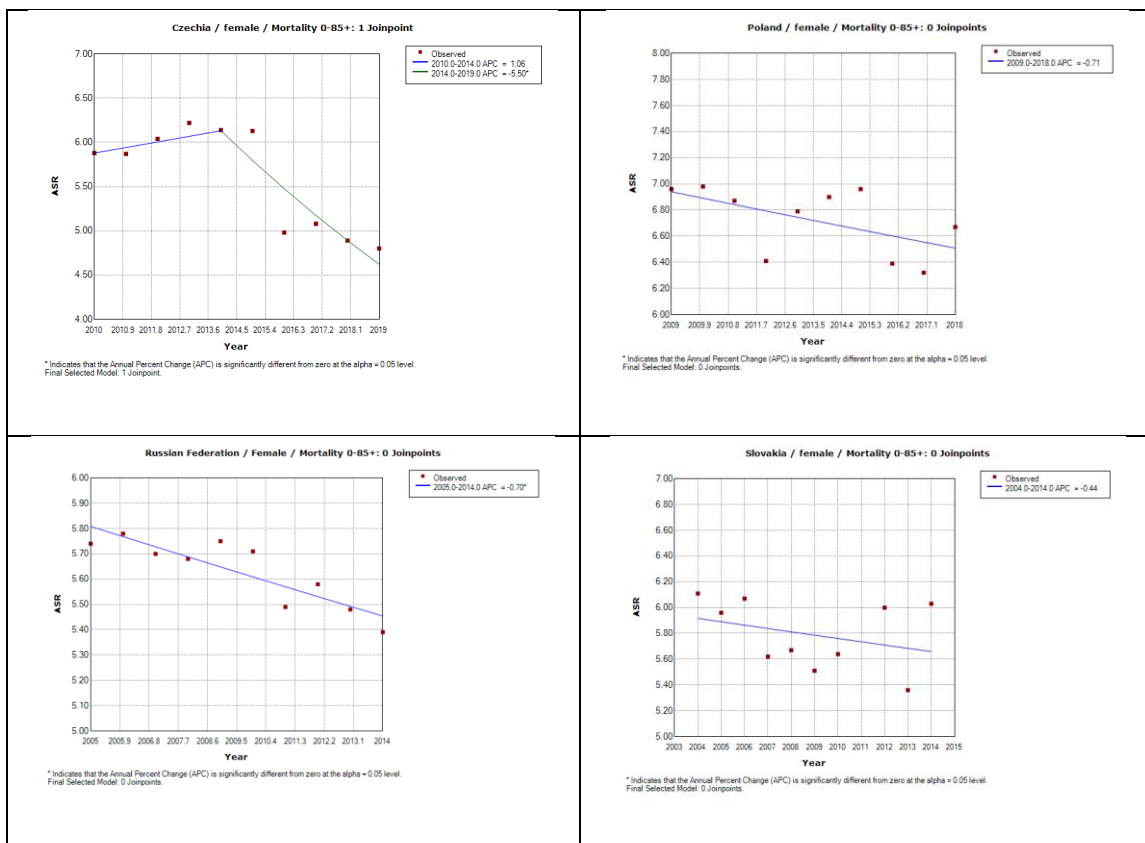

**Supplementary Figure S3. AAPC of incidence of ovarian cancer aged 50 years and older**

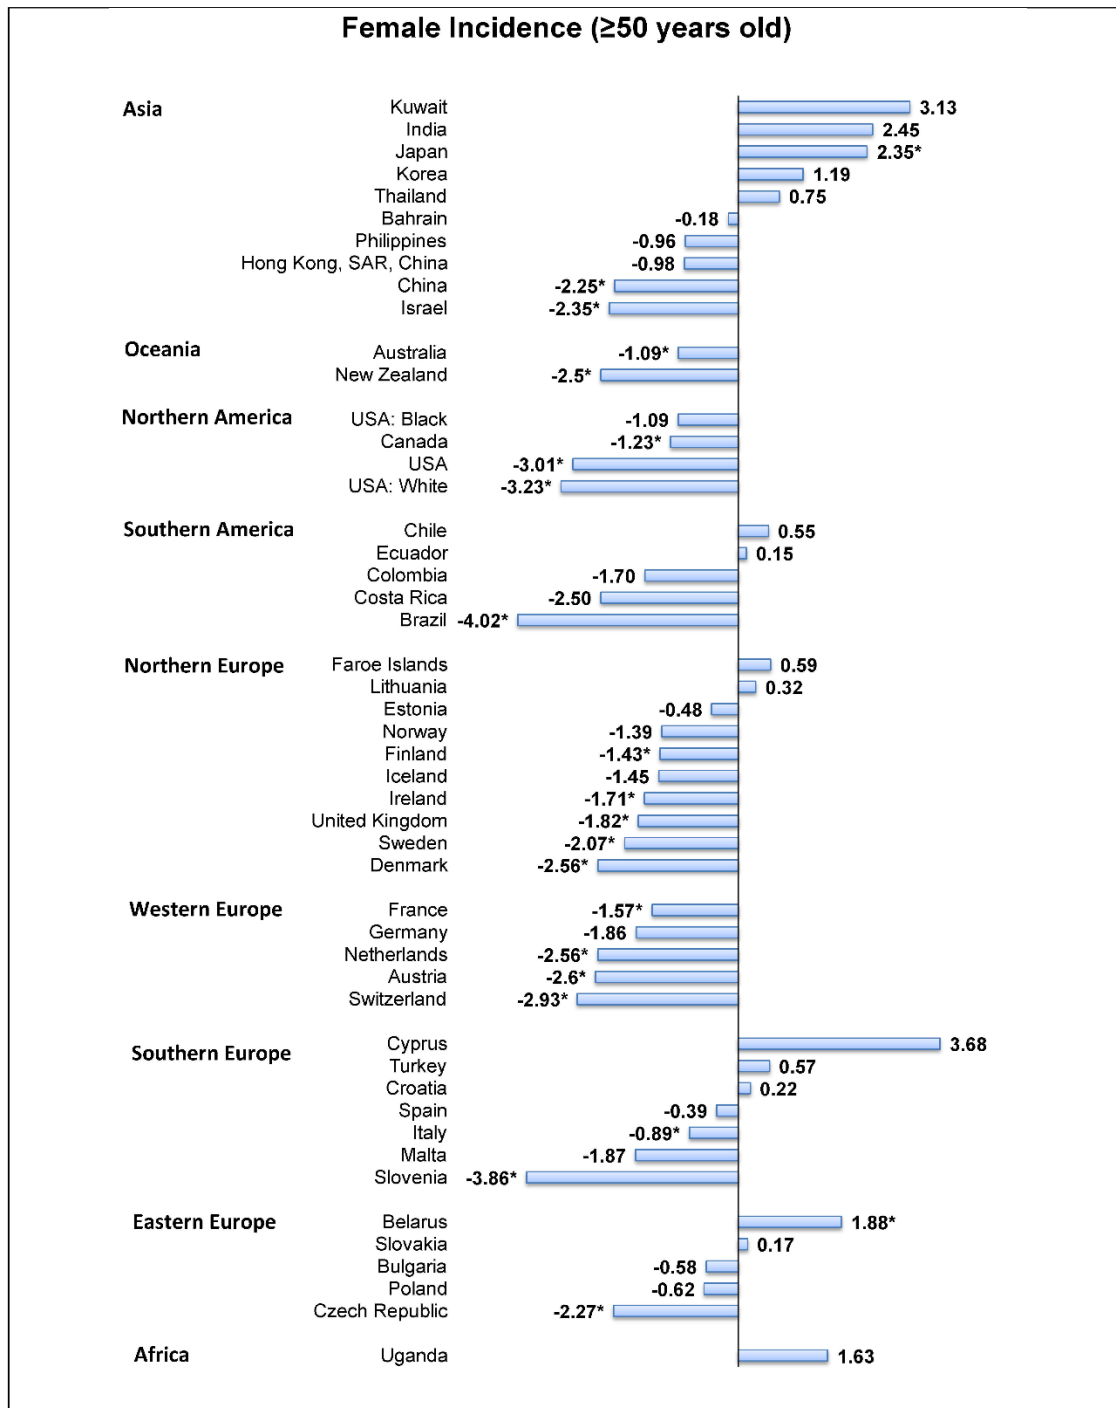

**Supplementary Figure S4.** AAPC of incidence of ovarian cancer aged < 50 years old

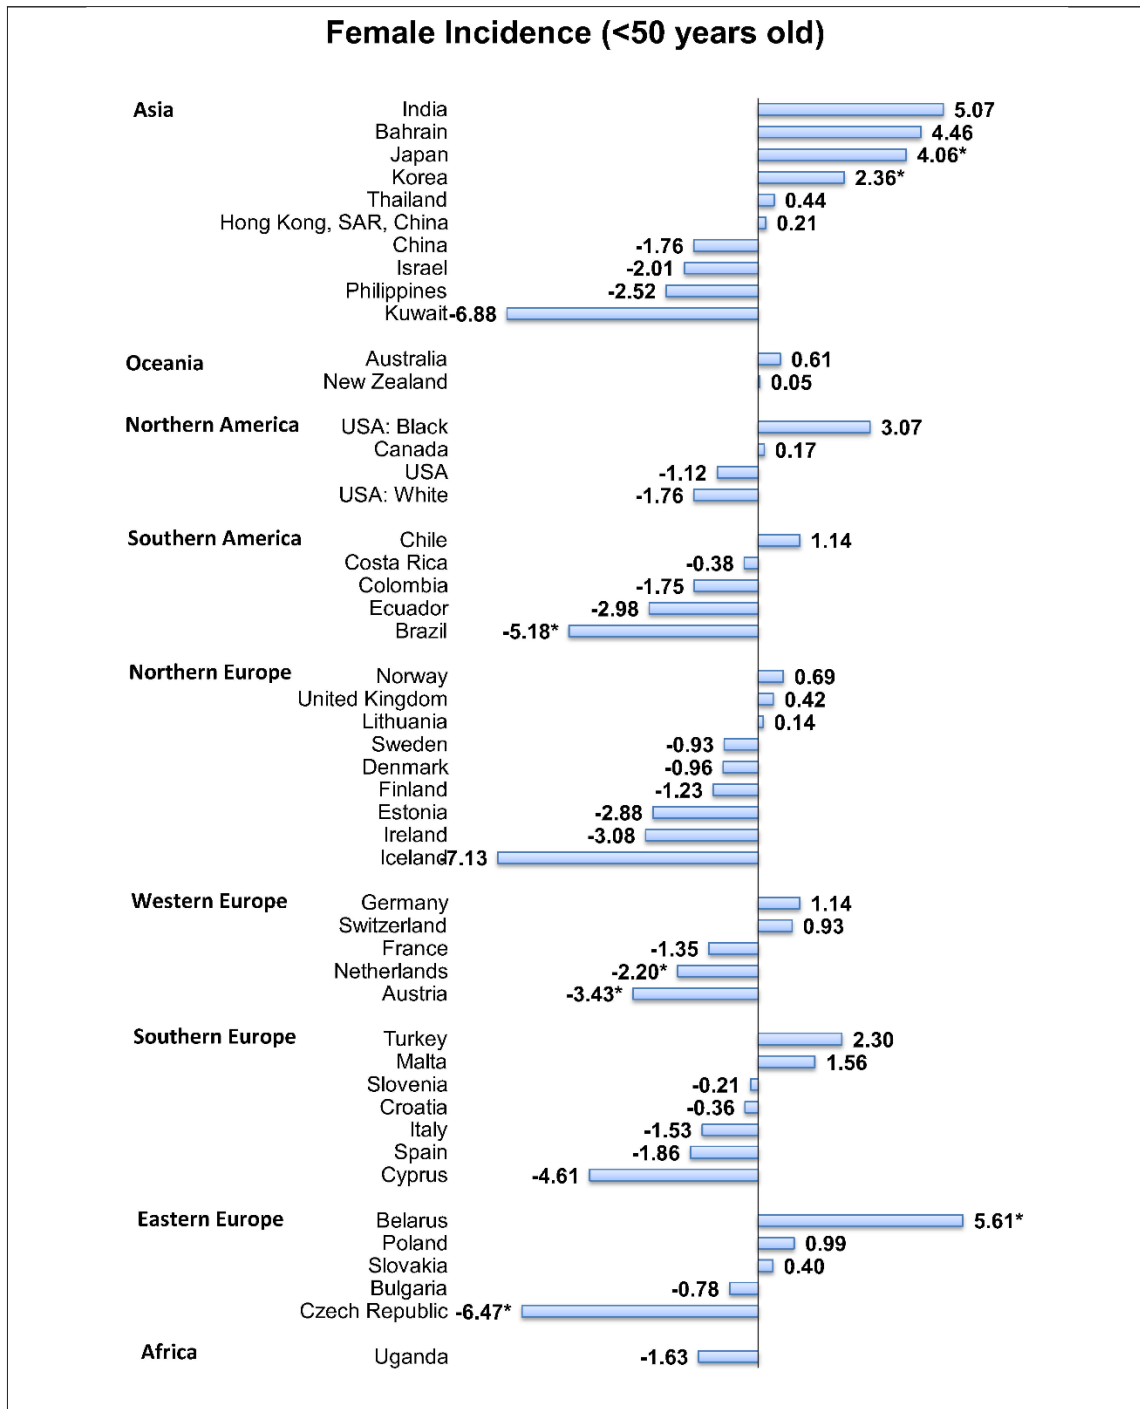

**Supplementary Figure S5.** AAPC of incidence of ovarian cancer aged < 40 years old

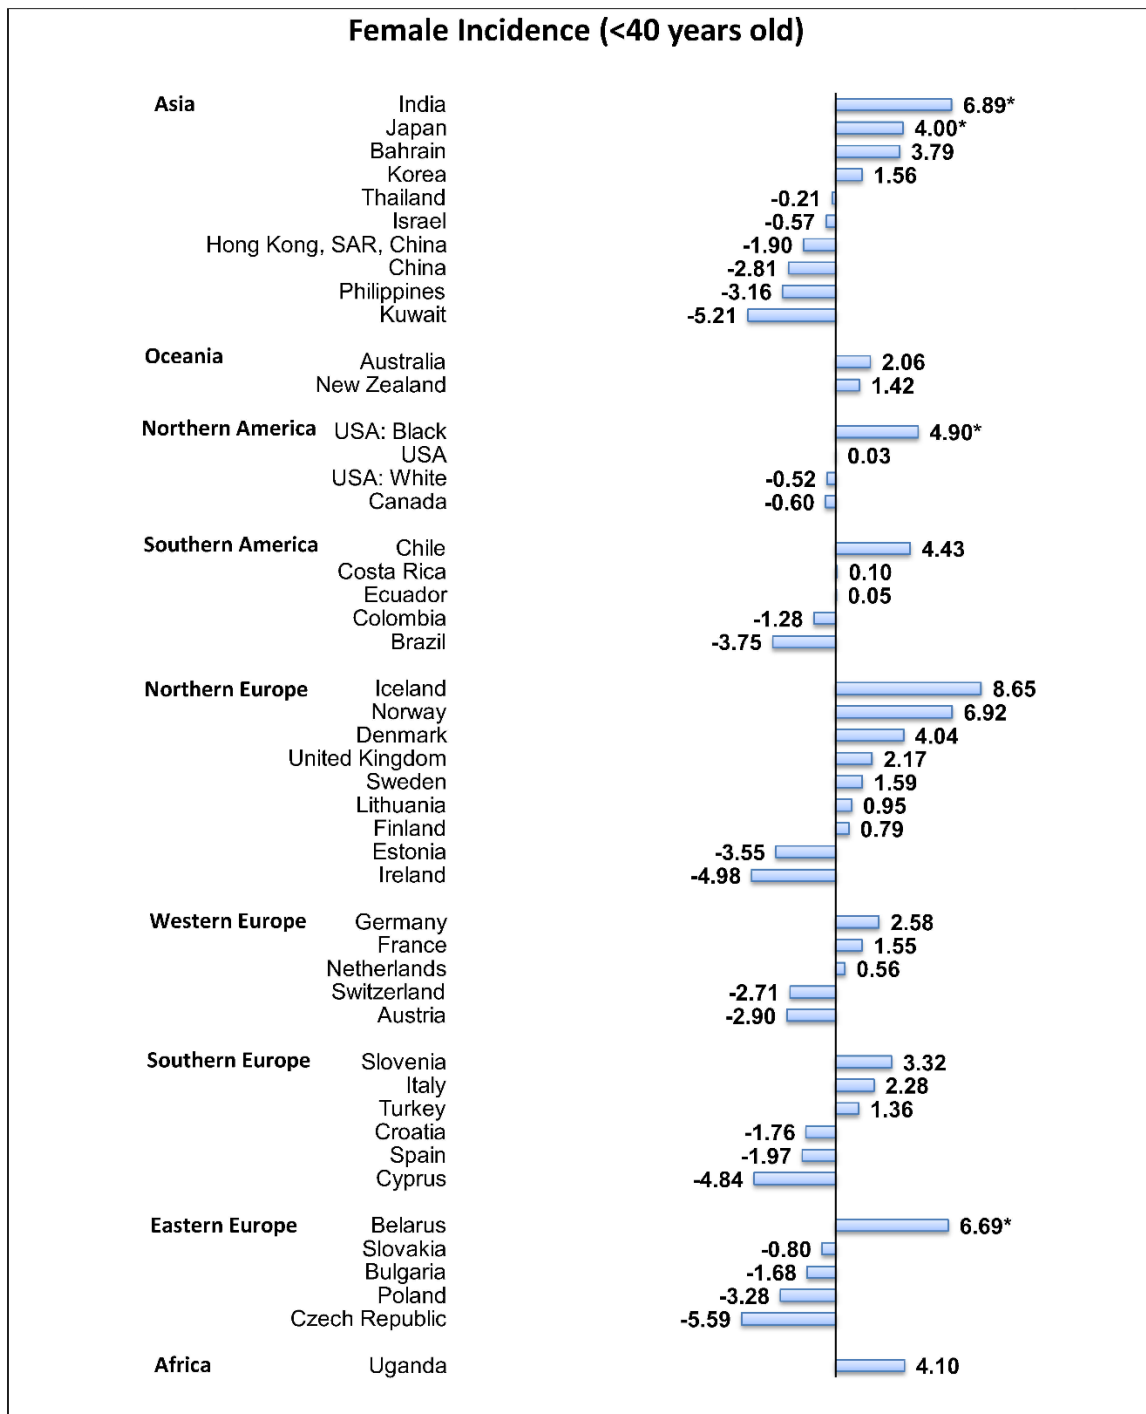

Supplement: s1 [file s1]
